# Supplementary material for: Design, Synthesis, In Silico Studies and In Vitro Evaluation of New Indole- and/or Donepezil-like Hybrids as Multitarget-Directed Agents for Alzheimer’s Disease
Source: MDPI journal article supplement (doi:10.3390/ph16091194), 2023-08-22
Supplement: s1 [file s1]

## Supporting information

# Design, Synthesis, In Silico Studies and In Vitro Evaluation of New Indole- and/or Donepezil-like Hybrids as Multitarget-Directed Agents for Alzheimer's Disease

Corresponding author: Violina T. Angelova; E-mail: v.stoyanova@pharmfac.mu-sofia.bg

|                                                                                                           |     |
|-----------------------------------------------------------------------------------------------------------|-----|
| Key NOESY correlations of hydrazide-hydrazones <b>3c</b> and <b>3o</b> .....                              | 2S  |
| Molecular docking of compound <b>5a</b> in the active site of AChE (PDB ID 4EY7) .....                    | 2S  |
| Visualization of the pocket of MT1 and MT2 receptors as well as detailed data of the docking results..... | 3S  |
| <sup>1</sup> H NMR, <sup>13</sup> C NMR and HRMS spectra <b>3a-r</b> .....                                | 10S |
| <sup>1</sup> H NMR, <sup>13</sup> C NMR and HRMS spectra for <b>5a-l</b> .....                            | 60S |
| References.....                                                                                           | 81S |

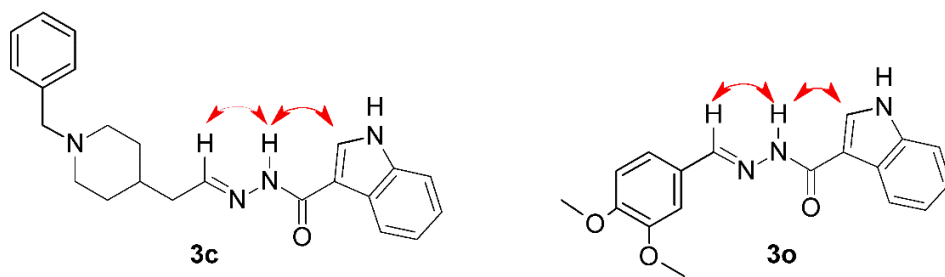

**Figure S1.** Key NOESY correlations of hydrazide-hydrazones **3c** and **3o**

## Molecular docking of compound 5a in the active site of AChE (PDB ID 4EY7)

a)

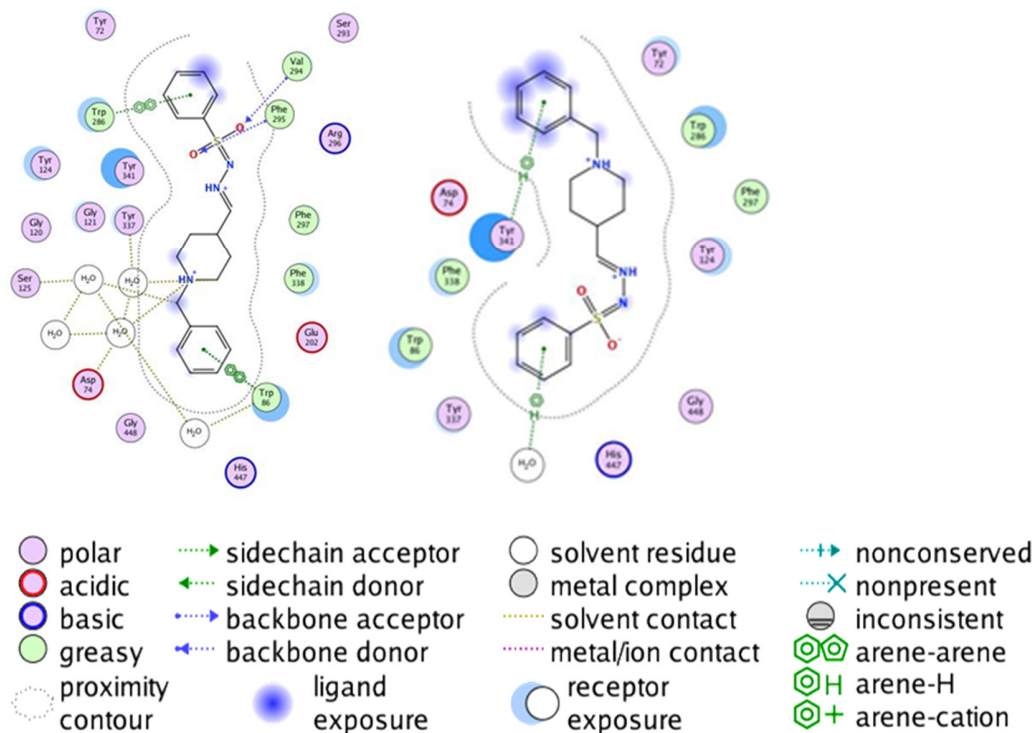

b)

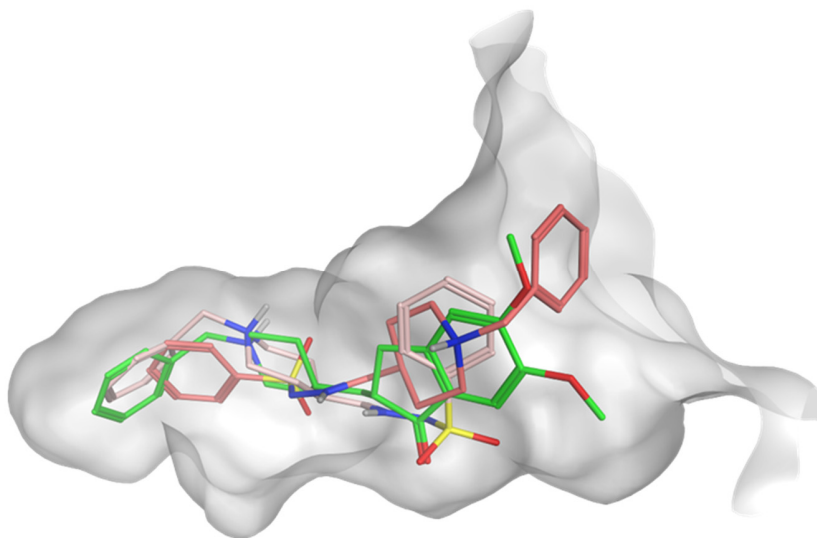

**Figure S2.** Docking results of compound **5a**: a) left – PLIs of the highest ranked pose; right – PLI of the second highest ranked pose; b) the best pose of donepezil (green), the highest ranked pose (light pink) and the second highest ranked pose (dark pink) in the active site of AChE (PDB ID 4EY7)

## Visualization of the pocket of MT1 and MT2 receptors as well as detailed data of the docking results

**Table S1.** RMSD of CA of the active site residues between aligned chains of selected PDB structures for MT1 modeling

| Chains   | 1    | 2    | 3    | 4    | 5    | 6    | 7    |
|----------|------|------|------|------|------|------|------|
| 1:6ME2.A |      | 0.18 | 0.21 | 0.22 | 1.1  | 1.04 | 0.84 |
| 2:6ME3.A | 0.18 |      | 0.22 | 0.21 | 1.13 | 1    | 0.84 |
| 3:6ME4.A | 0.21 | 0.22 |      | 0.23 | 1.12 | 1.01 | 0.85 |
| 4:6ME5.A | 0.22 | 0.21 | 0.23 |      | 1.12 | 1.04 | 0.88 |
| 5:7DB6.D | 1.1  | 1.13 | 1.12 | 1.12 |      | 1.4  | 1.23 |
| 6:7VGY.A | 1.04 | 1    | 1.01 | 1.04 | 1.4  |      | 0.72 |
| 7:7VGZ.B | 0.84 | 0.84 | 0.85 | 0.88 | 1.23 | 0.72 |      |

**Table S2.** Similarity of PDB sequences of selected PDB structures for modeling MT1 receptor according to BLUSSUM62

| Chains   | 1    | 2    | 3    | 4    | 5    | 6    | 7    |
|----------|------|------|------|------|------|------|------|
| 1:6ME2.A |      | 100  | 100  | 100  | 96.4 | 96.4 | 96.4 |
| 2:6ME3.A | 100  |      | 100  | 100  | 96.4 | 96.4 | 96.4 |
| 3:6ME4.A | 100  | 100  |      | 100  | 96.4 | 96.4 | 96.4 |
| 4:6ME5.A | 100  | 100  | 100  |      | 96.4 | 96.4 | 96.4 |
| 5:7DB6.D | 96.4 | 96.4 | 96.4 | 96.4 |      | 100  | 100  |
| 6:7VGY.A | 96.4 | 96.4 | 96.4 | 96.4 | 100  |      | 100  |
| 7:7VGZ.B | 96.4 | 96.4 | 96.4 | 96.4 | 100  | 100  |      |

**Table S3.** RMSD of CA of the active site residues between aligned chains of selected PDB structures for MT2 modeling

| Chains   | 1    | 2    | 3    | 4    | 5    | 6    | 7    | 8    | 9    | 10   |
|----------|------|------|------|------|------|------|------|------|------|------|
| 1:6ME6.A |      | 0.12 | 0.3  | 0.31 | 0.23 | 0.25 | 0.28 | 0.29 | 0.53 | 0.9  |
| 2:6ME6.B | 0.12 |      | 0.35 | 0.31 | 0.23 | 0.22 | 0.3  | 0.28 | 0.52 | 0.95 |

|           |      |      |      |      |      |      |      |      |      |      |
|-----------|------|------|------|------|------|------|------|------|------|------|
| 3:6ME7.A  | 0.3  | 0.35 |      | 0.14 | 0.36 | 0.39 | 0.41 | 0.42 | 0.61 | 0.91 |
| 4:6ME7.B  | 0.31 | 0.31 | 0.14 |      | 0.36 | 0.36 | 0.42 | 0.41 | 0.61 | 0.96 |
| 5:6ME8.A  | 0.23 | 0.23 | 0.36 | 0.36 |      | 0.08 | 0.17 | 0.18 | 0.54 | 0.93 |
| 6:6ME8.B  | 0.25 | 0.22 | 0.39 | 0.36 | 0.08 |      | 0.2  | 0.18 | 0.55 | 0.96 |
| 7:6ME9.A  | 0.28 | 0.3  | 0.41 | 0.42 | 0.17 | 0.2  |      | 0.09 | 0.58 | 0.94 |
| 8:6ME9.B  | 0.29 | 0.28 | 0.42 | 0.41 | 0.18 | 0.18 | 0.09 |      | 0.58 | 0.96 |
| 9:6PS8.A  | 0.53 | 0.52 | 0.61 | 0.61 | 0.54 | 0.55 | 0.58 | 0.58 |      | 0.95 |
| 10:7VH0.A | 0.9  | 0.95 | 0.91 | 0.96 | 0.93 | 0.96 | 0.94 | 0.96 | 0.95 |      |

**Table S4.** Similarity of PDB sequences of selected PDB structures for modeling MT2 receptor according to BLUSSUM62

| Chains    | 1    | 2    | 3    | 4    | 5    | 6    | 7    | 8    | 9    | 10   |
|-----------|------|------|------|------|------|------|------|------|------|------|
| 1:6ME6.A  |      | 98.6 | 99   | 98.3 | 99   | 98.6 | 98.6 | 97.9 | 81.8 | 96.4 |
| 2:6ME6.B  | 99   |      | 98.6 | 98.3 | 98.6 | 98.6 | 98.3 | 97.9 | 81.8 | 96.4 |
| 3:6ME7.A  | 98.6 | 97.9 |      | 98.6 | 98.3 | 97.9 | 97.9 | 97.2 | 81.1 | 96   |
| 4:6ME7.B  | 98.3 | 97.9 | 99   |      | 97.9 | 97.9 | 97.6 | 97.2 | 81.1 | 96   |
| 5:6ME8.A  | 99.3 | 98.6 | 99   | 98.3 |      | 98.6 | 98.6 | 97.9 | 81.8 | 96.4 |
| 6:6ME8.B  | 99   | 98.6 | 98.6 | 98.3 | 98.6 |      | 98.3 | 97.9 | 81.8 | 96.4 |
| 7:6ME9.A  | 99.3 | 98.6 | 99   | 98.3 | 99   | 98.6 |      | 98.6 | 81.8 | 96.4 |
| 8:6ME9.B  | 99   | 98.6 | 98.6 | 98.3 | 98.6 | 98.6 | 99   |      | 81.8 | 96.4 |
| 9:6PS8.A  | 81.5 | 81.2 | 81.1 | 80.8 | 81.2 | 81.2 | 81   | 80.7 |      | 81.3 |
| 10:7VH0.A | 93.4 | 93.1 | 93.4 | 93   | 93.1 | 93.1 | 92.7 | 92.4 | 79   |      |



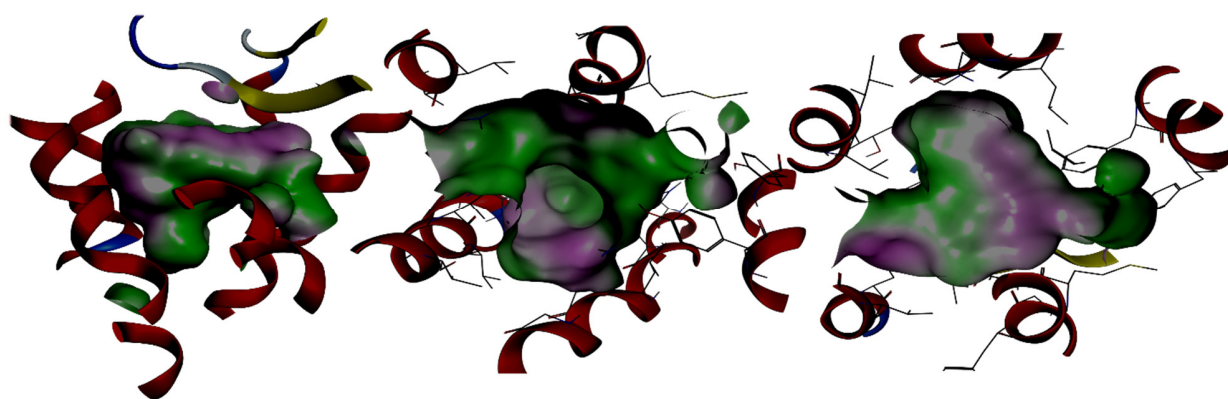

**Figure S3.** Side, up and down view, respectively, of the pocket that forms the active site in our model of the MT1 receptor (lipophilic parts of the pocket are in green, while hydrophilic are represented in pink)

**Table S5.** The best results from induced fit docking of ligands on MT1 receptor according to GBVI/WSA scoring function (kcal/mol)

| Name | Formula                                                                             | Score |
|------|-------------------------------------------------------------------------------------|-------|
| 3a   | 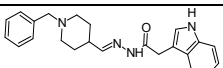 | -27.1 |
| 3b   |  | -23.0 |
| 3c   |  | -26.7 |
| 3d   |  | -23.0 |
| 3i   |  | -25.8 |
| 3m   |  | -22.4 |
| 3n   |  | -20.1 |
| 5a   |  | -26.0 |

|           |                                                                                   |       |
|-----------|-----------------------------------------------------------------------------------|-------|
| <b>5d</b> | 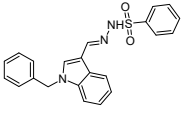 | -20.8 |
| <b>5g</b> |  | -21.8 |
| <b>5j</b> |  | -22.9 |

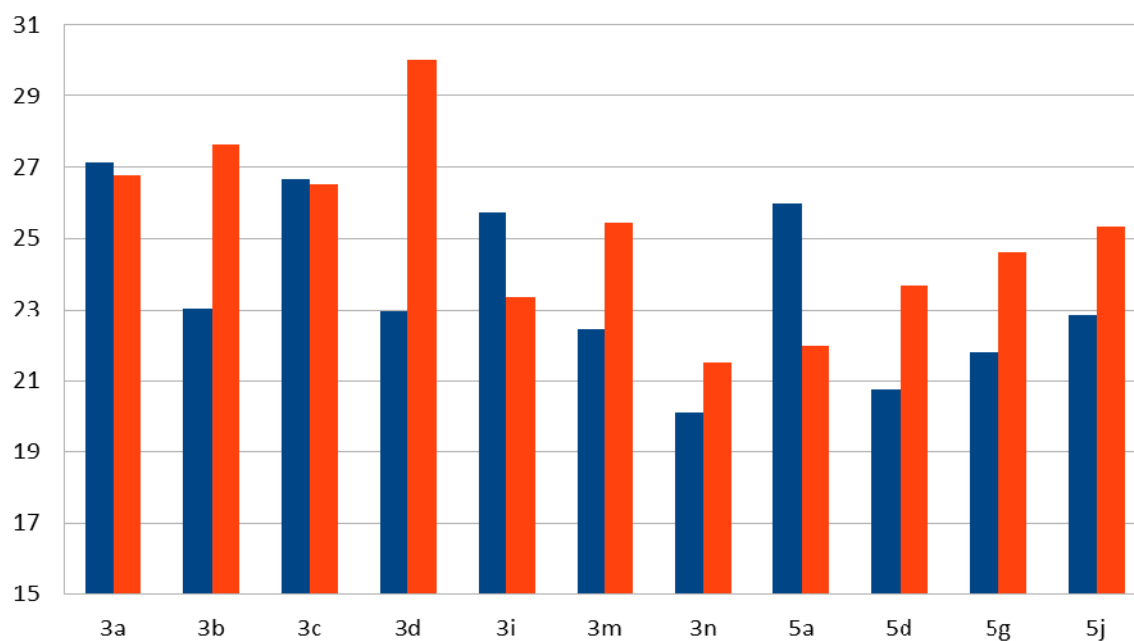

**Figure S4.** The best interaction energies of our ligands with the MT1 (blue) and MT2 (red) receptors according to GBVI/WSA scoring function (kcal/mol)

In order to elucidate functional groups that are essential for receptor-ligand interactions in our case a Protein Ligand Interaction Fingerprints (PLIF) analysis was performed. Being method for summarizing the interactions between ligands and receptor using a fingerprint scheme it reveals which binding site residues tends to interact with which parts of the ligands.

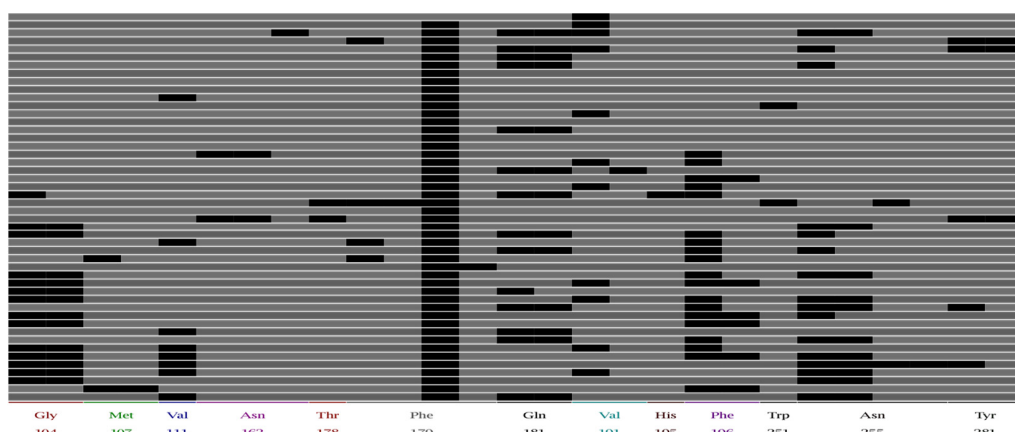

**Figure S5.** PLIF Barcode map of interaction between the best 50 ligands poses and amino acids of the active site cavity of the MT1 receptor.

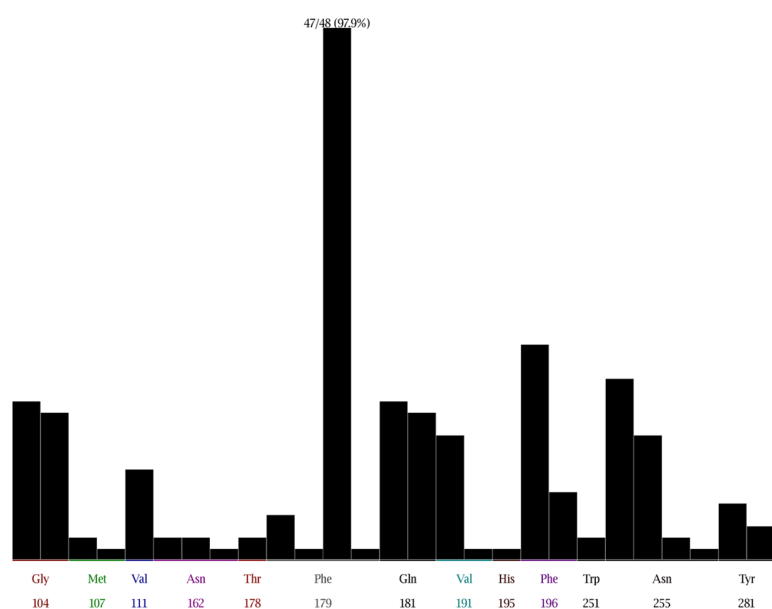

**Figure S6.** Population histogram of the interactions of the first 50 ligand poses with residues inside active site of the receptor according to PLIF analysis (Phe179)

## MT2 receptor docking results

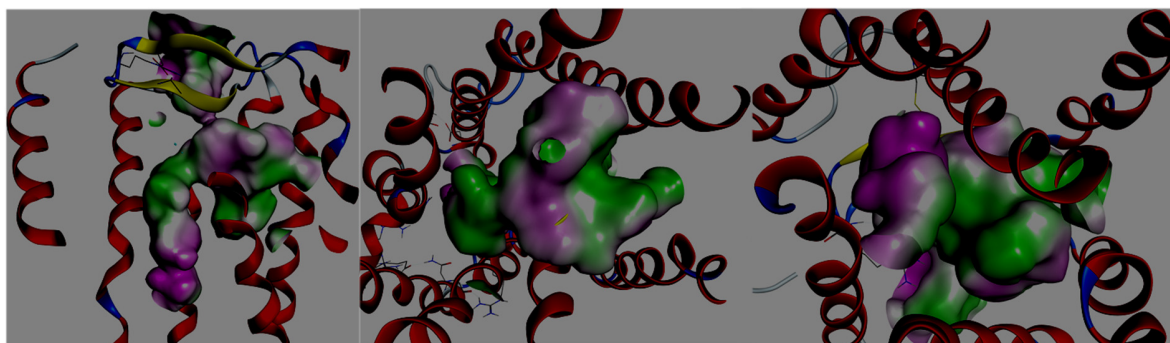

**Figure S7.** Side, up and down view, respectively, of the pocket that forms the active site in our model of the MT2 receptor (lipophilic parts of the pocket are in green, while hydrophilic are represented in pink)

**Table S6.** The best results from induced fit docking of ligands on MT2 receptor according to GBVI/WSA scoring function (kcal/mol)

| Name      | Formula                                                                             | Score |
|-----------|-------------------------------------------------------------------------------------|-------|
| <b>3a</b> | 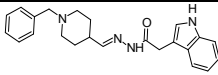 | -26.8 |
| <b>3b</b> |  | -27.6 |
| <b>3c</b> |  | -26.5 |
| <b>3d</b> |  | -30.0 |
| <b>3i</b> |  | -23.4 |
| <b>3m</b> |  | -25.4 |
| <b>3n</b> |  | -21.5 |

|           |                                                                                   |       |
|-----------|-----------------------------------------------------------------------------------|-------|
| <b>5a</b> | 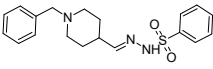 | -22.0 |
| <b>5d</b> |  | -23.7 |
| <b>5g</b> |  | -24.6 |
| <b>5j</b> |  | -25.4 |

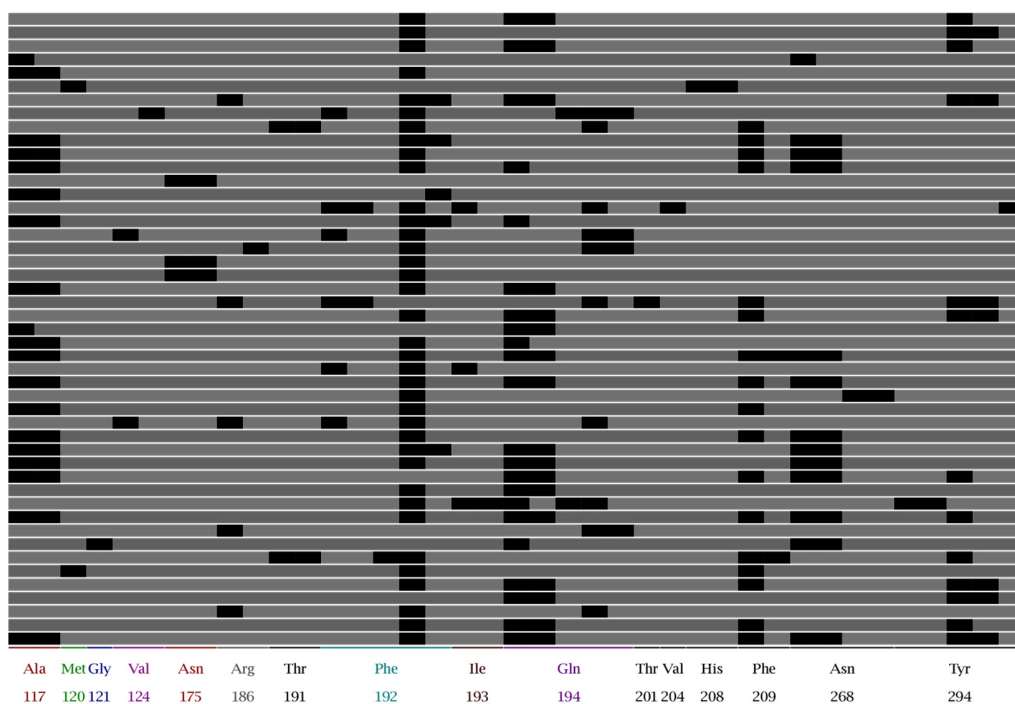

**Figure S8.** Barcode map of interaction between best 50 ligands poses and amino acids of the active site cavity of the MT2 receptor

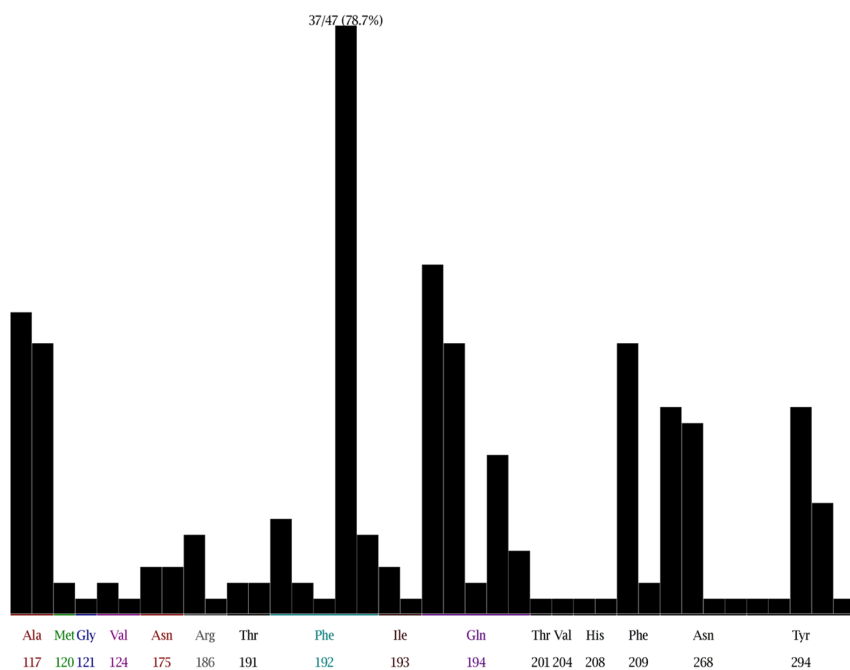

**Figure S9.** Population histogram of the interactions of the first 50 ligand poses with residues inside the active site of the receptor according to PLIF analysis

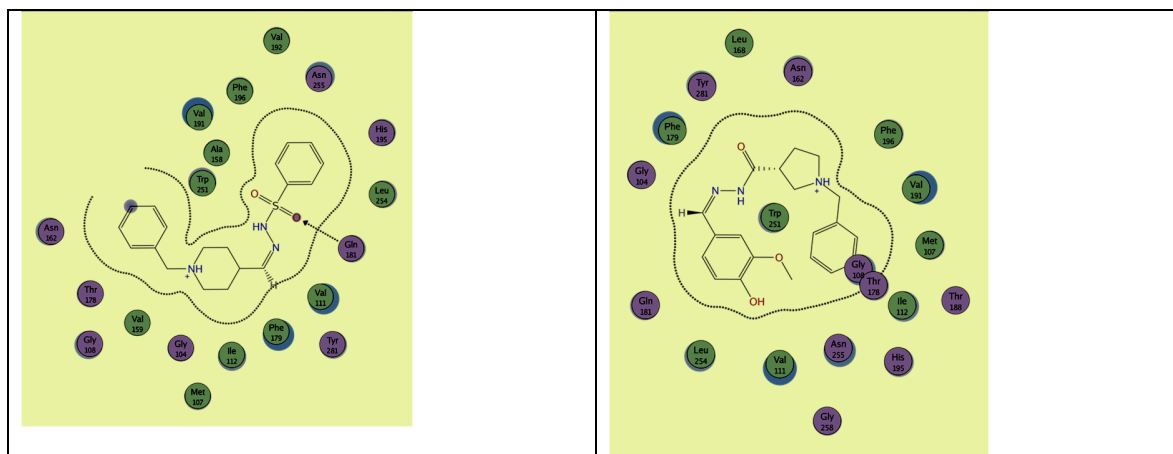

**Figure S10.** Interaction maps of the best poses of the third (**5a** left) and forth (**3i** right) of the best ligands for MT1 receptor

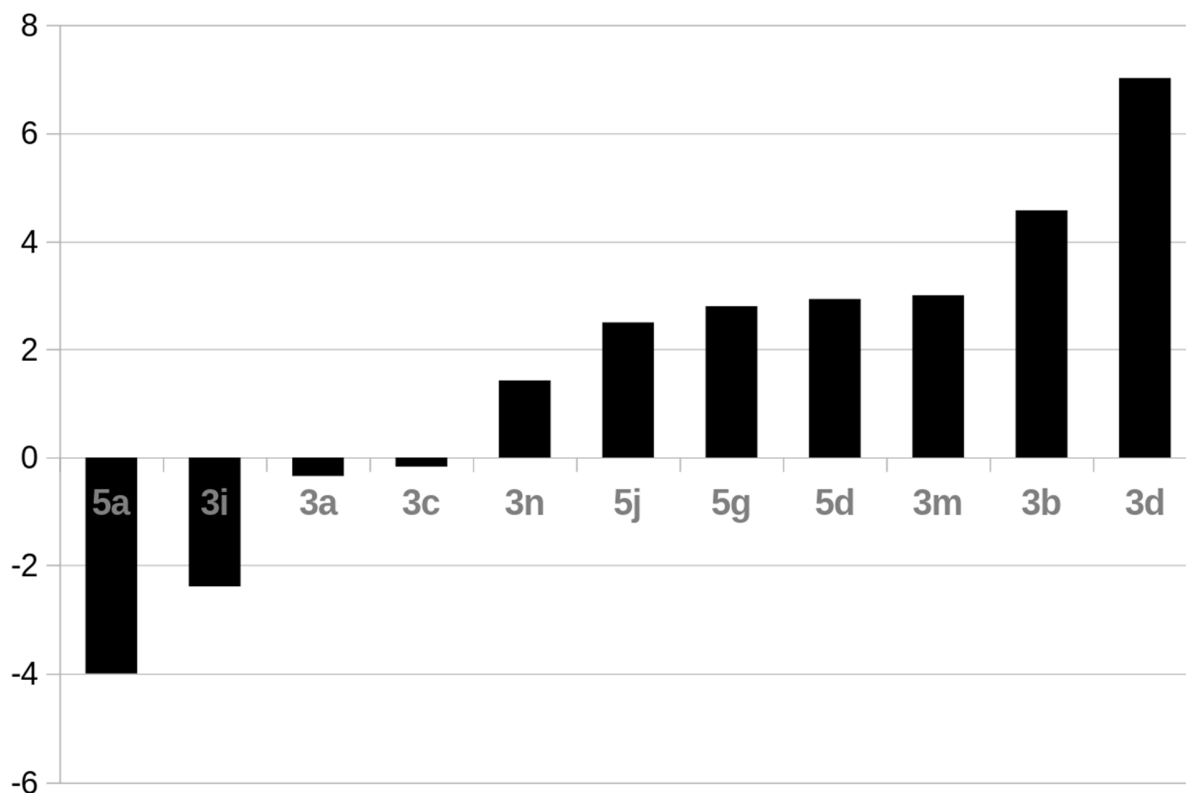

**Figure S11.** Difference between MT2 and MT1 receptor binding energies of our ligands (kcal/mol). Ligands with negative values prefer to bind to MT1, while ligands with positive values prefer to bind to MT2.

## <sup>1</sup>H NMR, <sup>13</sup>C NMR and HRMS spectra

### 1. *N'*-(*E*)-(1-benzylpiperidin-4-yl)methylidene]-2-(1*H*-indol-3-yl)acetohydrazide, 3a

Yield: 68%; m.p. 167-168°C. <sup>1</sup>H NMR (400 MHz, DMSO-d<sub>6</sub>): 1:0.83 mixture of conformers; signals for major synperiplanar conformer around the amide bond: δ = 1.42-1.53 (m, 2H, CH<sub>2</sub>), 1.67-1.78 (m, 2H, CH<sub>2</sub>), 1.94-2.04 (m, 2H, CH<sub>2</sub>), 2.17-2.24 (m, 1H, H-4'), 2.77-2.82 (m, 2H, CH<sub>2</sub>), 3.46 (s, 2H, CH<sub>2</sub>), 3.90 (s, 2H, CH<sub>2</sub>), 6.98 (ddd, J=1.00, 7.0, 8.0 Hz, 1H, H-5), 7.05 (ddd, J=1.0, 7.0, 5.0 Hz, 1H, H-6), 7.17 (d, J=2.3 Hz, 1H, H-2), 7.22-7.33 (m, 10H, H-2'', H-3'', H-4'', H-5'' and H-6''), 7.35 (d, J=7.0 Hz, 1H, H-7), 7.44 (d, J=5.3 Hz, 1H, CH), 7.53 (d, J=8.2 Hz, 1H, H-4), 10.84 (s, 1H, NH), 10.85 (bs, 1H, NH); resolved signals for minor antiperiplanar conformer around the amide bond: 3.45 (s, 2H, CH<sub>2</sub>), 3.53 (s, 2H, CH<sub>2</sub>), 6.96 (ddd, J=1.0, 7.0, 8.0 Hz, 1H, H-5), 7.07 (ddd, J=1.0, 7.0, 5.0 Hz, 1H, H-6), 7.20 (d, J=2.3 Hz, 1H, H-2), 10.89 (bs, 1H, NH), 11.06 (s, 1H, NH); <sup>13</sup>C NMR (100 MHz, DMSO-d<sub>6</sub>): signals for major synperiplanar conformer around the amide bond: δ = 28.85 (CH<sub>2</sub>), 29.06 (CH<sub>2</sub>), 38.10 (C-4'), 52.45 (CH<sub>2</sub>), 62.39 (CH<sub>2</sub>), 108.22 (C-3), 111.24 (C-7), 118.19 (C-5), 118.65 (C-4), 120.84 (C-6), 120.95 (C-5), 123.83 (C-2),

126.80 (C-4''), 127.14 (C-4a), 127.39 (C-4a), 128.11 (C-3'' and C-5''), 128.73 (C-2'' and C-6''), 135.95 (C-7a), 138.51 (C-1''), 149.21 (CH), 166.66 (C=O); resolved signals for minor antiperiplanar conformer around the amide bond: 152.96 (CH), 172.20 (C=O). HRMS (ESI)  $m/z$ : calcd: [M+H]<sup>+</sup> 375.217938. Found: [M+H]<sup>+</sup> 375.2178

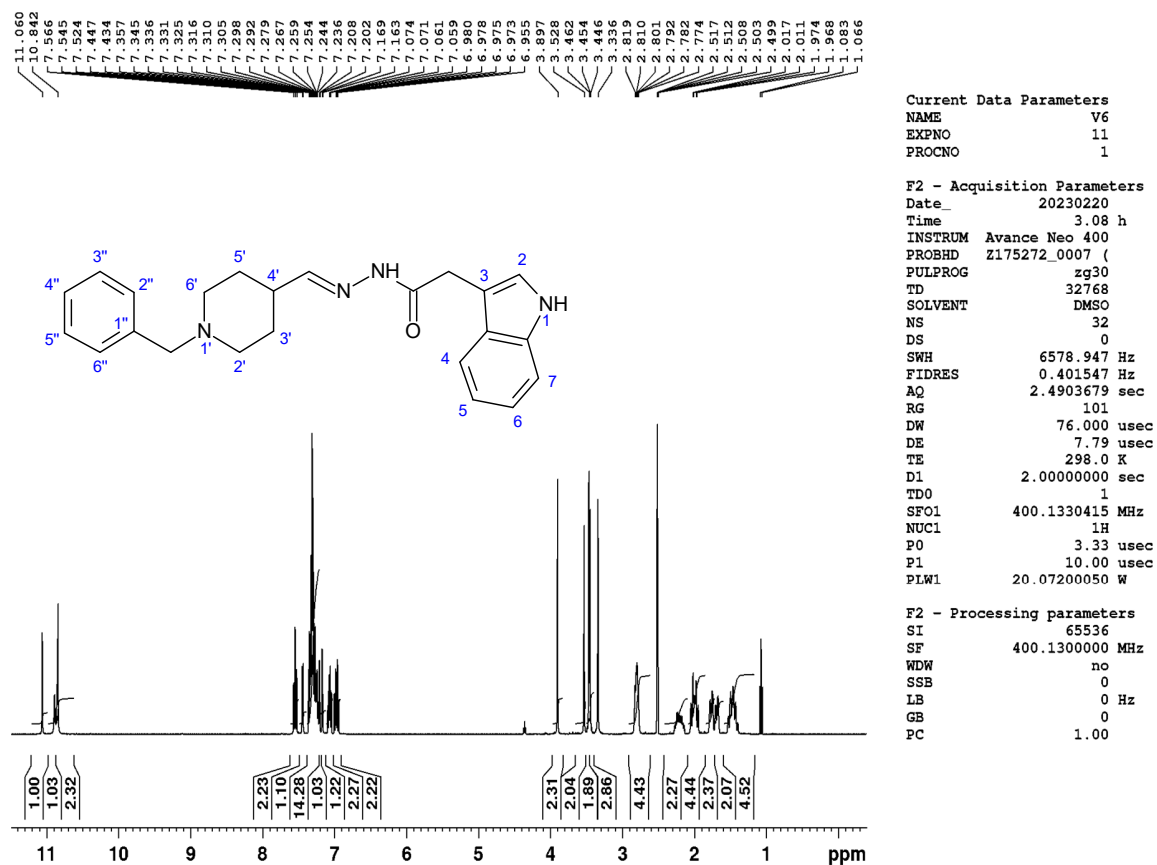

Figure S12. <sup>1</sup>H NMR spectrum of compound **3a** in DMSO-*d*<sub>6</sub>



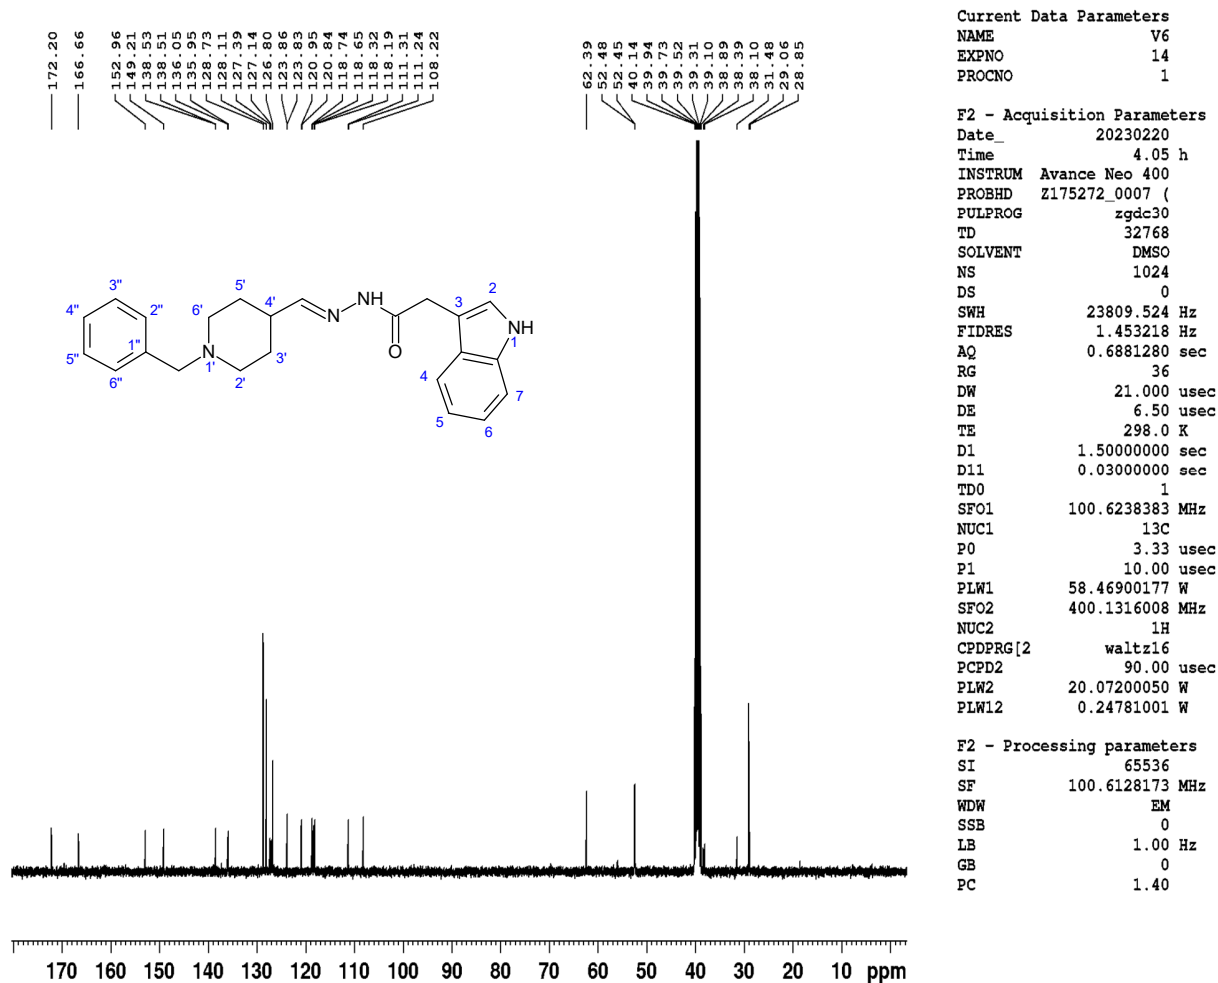

**Figure S13.**  $^{13}\text{C}$  NMR spectrum of compound **3a** in  $\text{DMSO-}d_6$

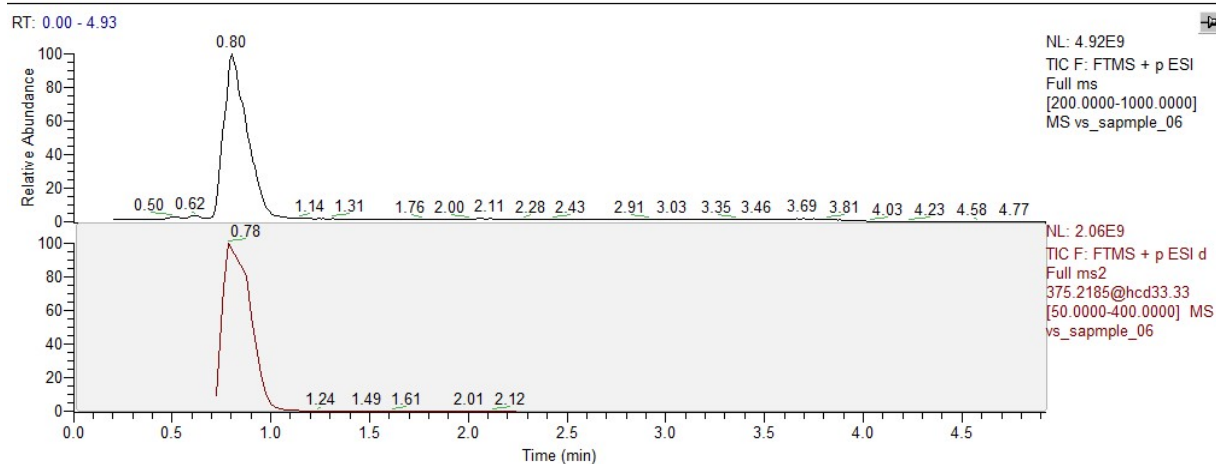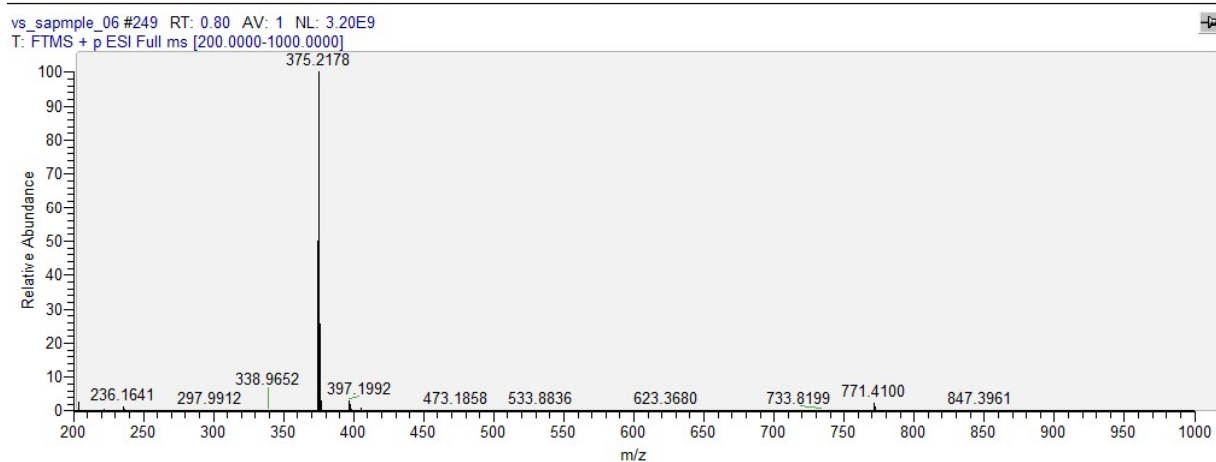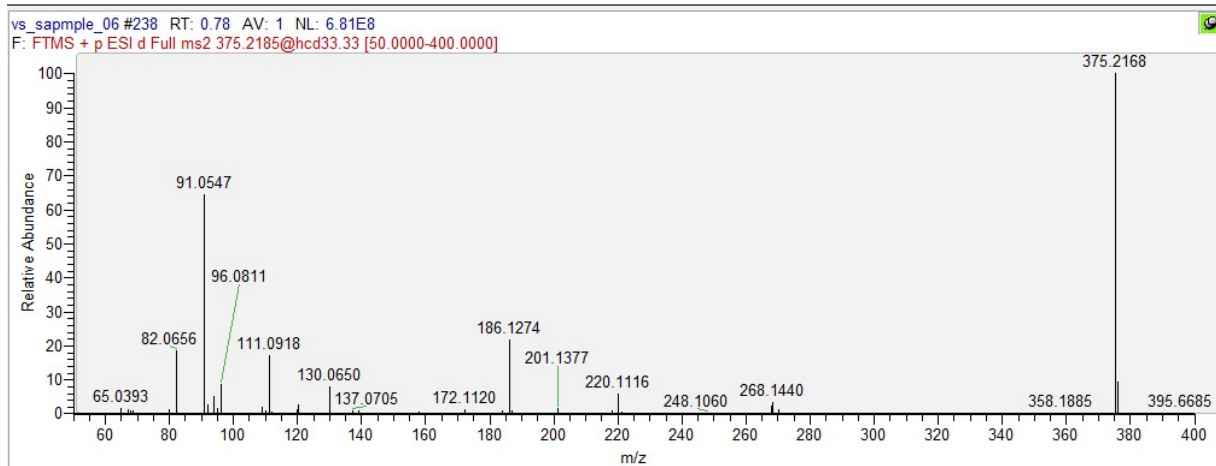**Figure S14. HRMS of compound 3a**

## 2. *N'*-(*E*)-(1-benzylpiperidin-4-yl)methylidene]-2,4-dihydroxybenzohydrazide, **3b**

Yield: 59%; m.p. 201-203°C.  $^1\text{H}$  NMR (400 MHz, DMSO- $d_6$ ):  $\delta$  = 1.46 (dd,  $J$ =3.1, 11.7, 1H) and 1.52 (dd,  $J$ =3.1, 11.7 Hz, 1H,  $\text{CH}_2$ ), 1.74 (dd,  $J$ =2.7, 13.5 Hz, 2H,  $\text{CH}_2$ ), 2.00-2.05 (m, 2H,  $\text{CH}_2$ ), 2.22-2.34 (m, 1H, H-4'), 2.82 (d,  $J$ =11.4 Hz, 2H,  $\text{CH}_2$ ), 3.48 (s, 2H,  $\text{CH}_2$ ), 6.27 (d,  $J$ =2.3 Hz, 1H, H-3), 6.32 (dd,  $J$ =2.3, 8.7 Hz, 1H, H-5), 7.23-7.35 (m, 5H, Ar), 7.67 (d,  $J$ =5.0 Hz, 1H, CH), 7.72 (d,  $J$ =8.7 Hz, 1H, H-6), 10.17 (bs, 1H, OH), 11.32 (bs, 1H, NH), 12.44 (bs, 1H, OH).

$^{13}\text{C}$  NMR (100 MHz, DMSO- $d_6$ ):  $\delta$  = 29.00 (C-3' and C-5'), 38.53 (C-4'), 52.42 (C-2' and C-6'), 62.36 ( $\text{CH}_2$ ), 102.81 (C-3), 105.87 (C-1), 107.19 (C-5), 126.86 (C-4''), 128.13 (C-3'' and C-5''), 128.78 (C-2'' and C-6''), 129.35 (C-6), 138.41 (C-1''), 155.26 (CH), 162.49 and 162.53 (C-2 and C-4), 165.44 (C=O). HRMS (ESI)  $m/z$ : calcd:  $[\text{M}+\text{H}]^+$  354.181218. Found:  $[\text{M}+\text{H}]^+$  354,1811

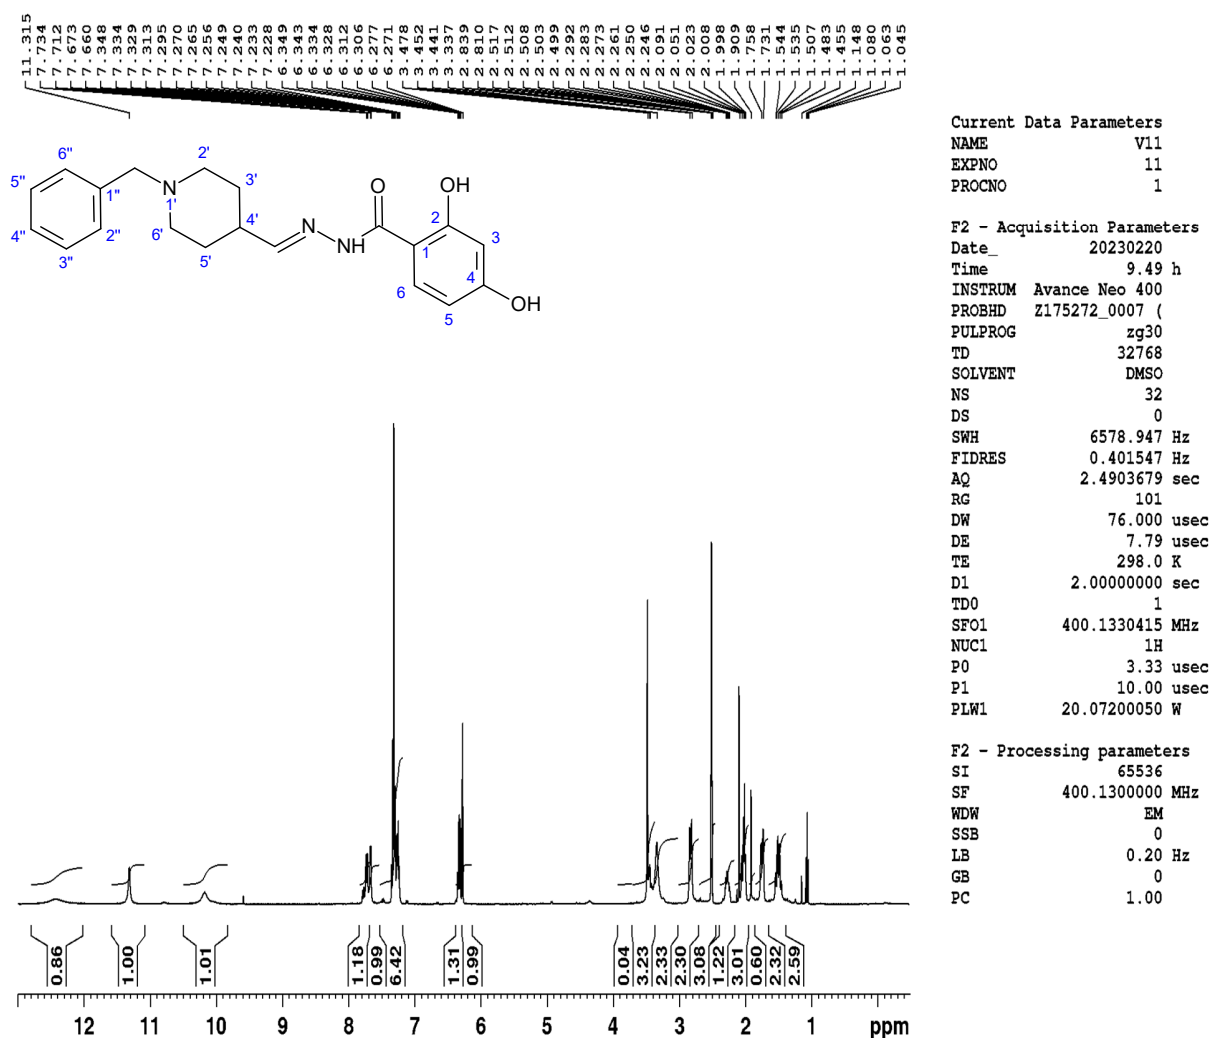

**Figure S15.**  $^1\text{H}$  NMR spectrum of compound **3b** in DMSO- $d_6$

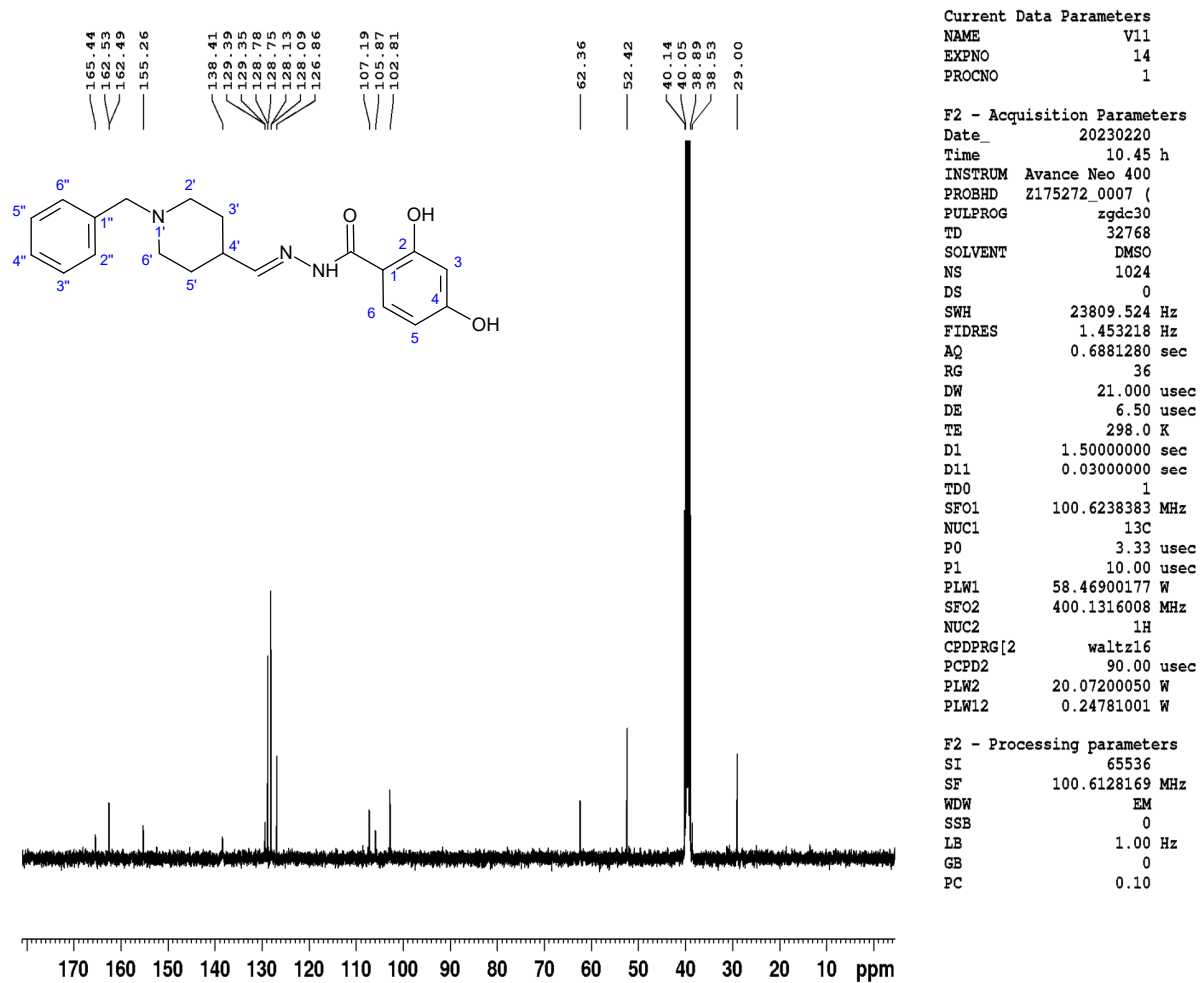

**Figure S16.**  $^{13}\text{C}$  NMR spectrum of compound **3b** in  $\text{DMSO-}d_6$

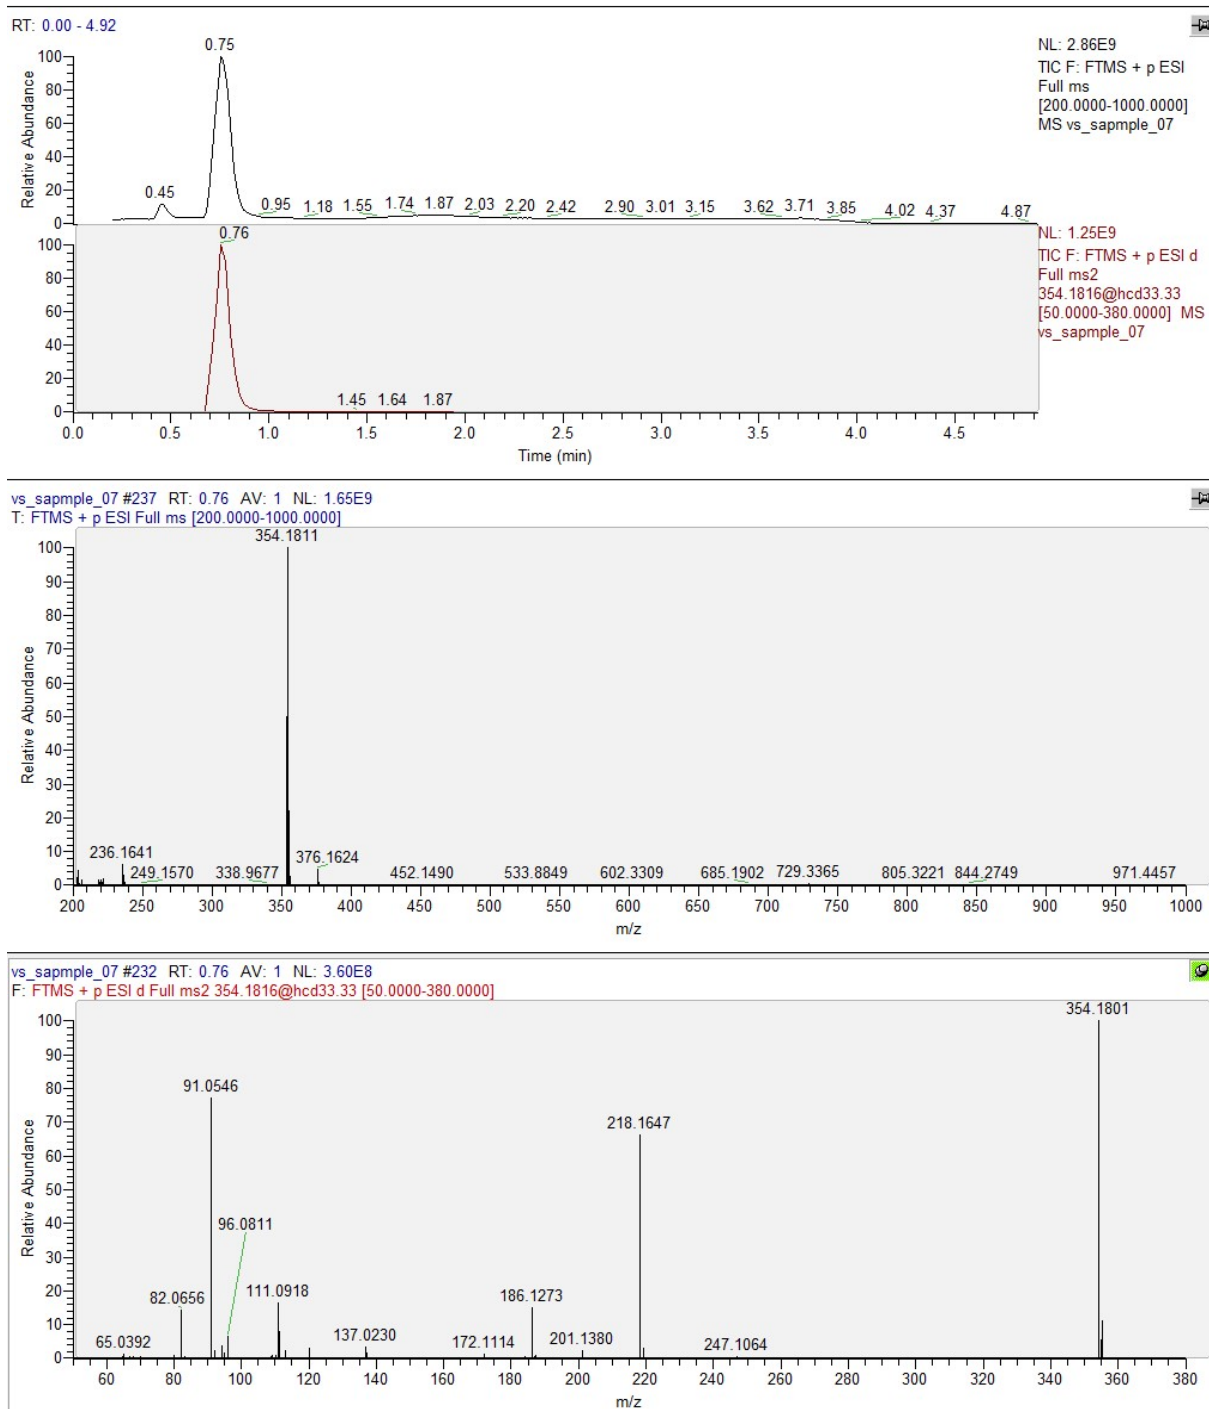

Figure S17. HRMS of compound 3b

3. *N'-[(E)-(1-benzylpiperidin-4-yl)methylidene]-1H-indole-3-carbohydrazide, 3c*

Yield: 72%; m.p. 249-250°C. <sup>1</sup>H NMR (400 MHz, DMSO-d<sub>6</sub>, 363K): δ = 1.51 (dd, J=3.7, 11.3 Hz, 1H, CH<sub>2</sub>), 1.57 (dd, J=3.7, 11.1 Hz, 1H, CH<sub>2</sub>), 1.79 (dd, J=3.4, 12.9 Hz, 2H, CH<sub>2</sub>), 2.09 (dt, J=2.6, 11.3 Hz, 2H, CH<sub>2</sub>), 2.23-2.32 (m, 1H, H-4'), 2.82 (td, J=3.5, 11.7 Hz, 1H, CH<sub>2</sub>), 3.49 (s, 2H, CH<sub>2</sub>), 7.12 (dt, J=1.2, 10.9 Hz, 1H, H-5), 7.16 (dt, J=1.4, 7.5 Hz, 1H, H-6), 7.21-7.26 (m, 1H, H-4''), 7.29-7.32 (m, 4H, C-3'', C-5'', C-2'' and C-6''), 7.44 (d, J=7.9 Hz, 1H, H-7), 7.55 (d, J=4.8 Hz, 1H, CH), 8.12 (bs, 1H, H-2), 8.17 (d, J=7.3 Hz, 1H, H-4), 10.53 (bs, 1H, NH), 11.36 (bs, 1H, NH).

<sup>13</sup>C NMR (100 MHz, DMSO-d<sub>6</sub>, 363K): δ = 29.01 (C-3' and C-5'), 37.97 (C-4'), 52.19 (C-2' and C-6'), 62.11 (CH<sub>2</sub>), 108.42 (C-3), 111.44 (C-7), 120.21 (C-5), 120.95 (C-4), 121.73 (C-6), 126.43 (C-4''), 126.63 (C-4a), 127.74 (C-3'' and C-3''), 128.44 (C-2'' and C-6''), 129.27 (C-2), 135.69 (C-7a), 138.34 (C-1''), 150.89 (CH), 162.35 (C=O). HRMS (ESI) m/z: calcd: [M+H]<sup>+</sup> 361.202288. Found: [M+H]<sup>+</sup> 361.2021

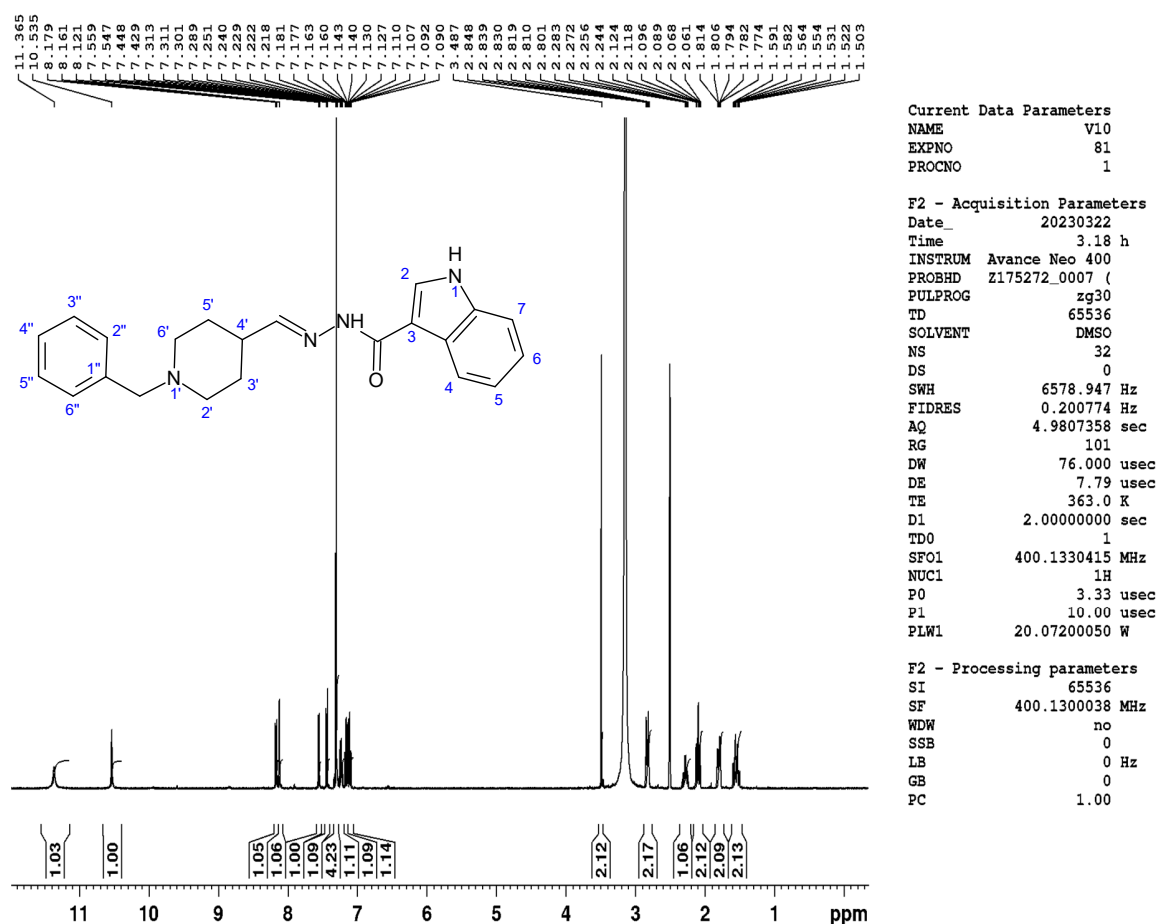

Figure S18. <sup>1</sup>H NMR spectrum of compound 3c in DMSO-d<sub>6</sub>

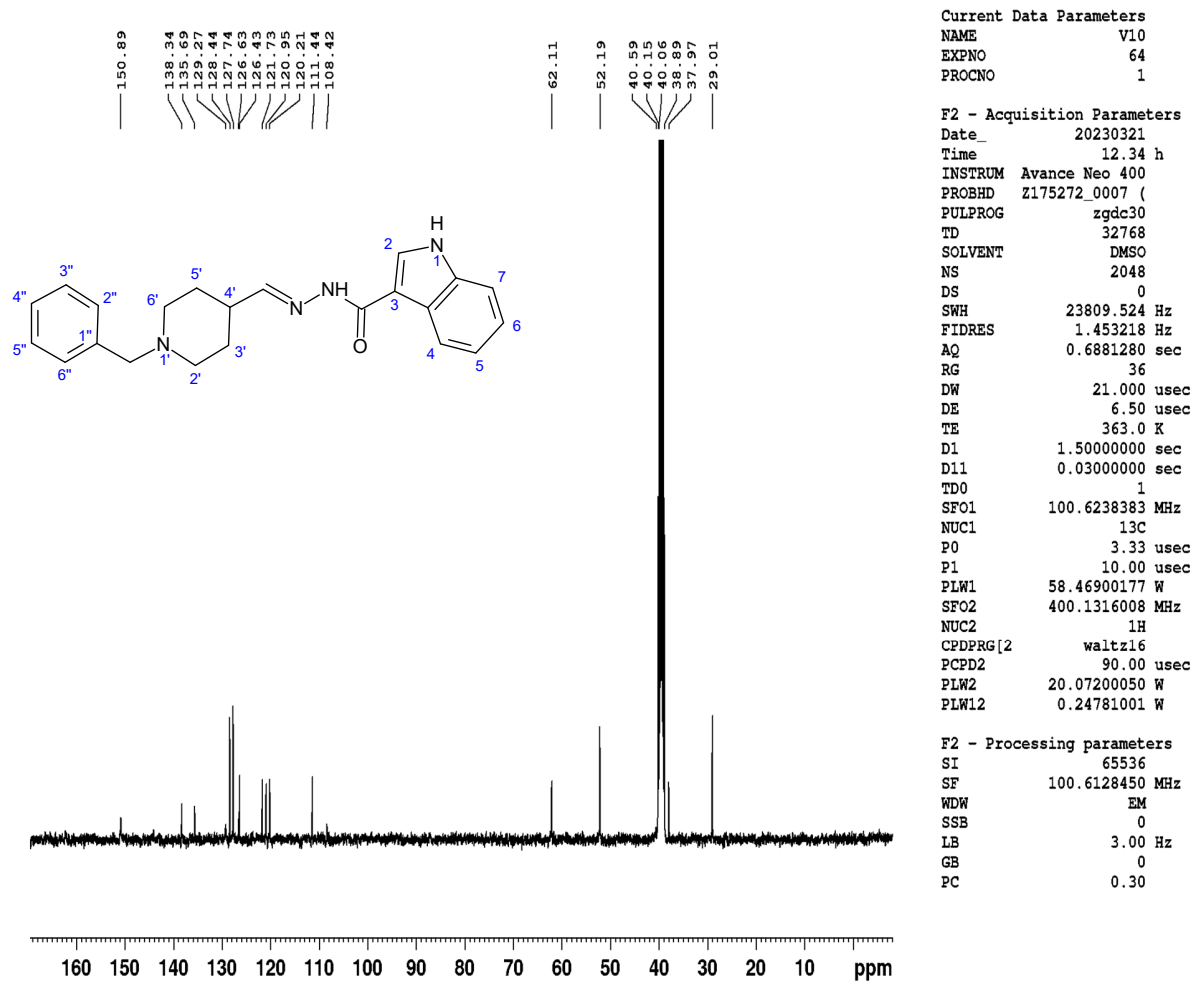

**Figure S19.** <sup>13</sup>C NMR spectrum of compound **3c** in DMSO-*d*<sub>6</sub>

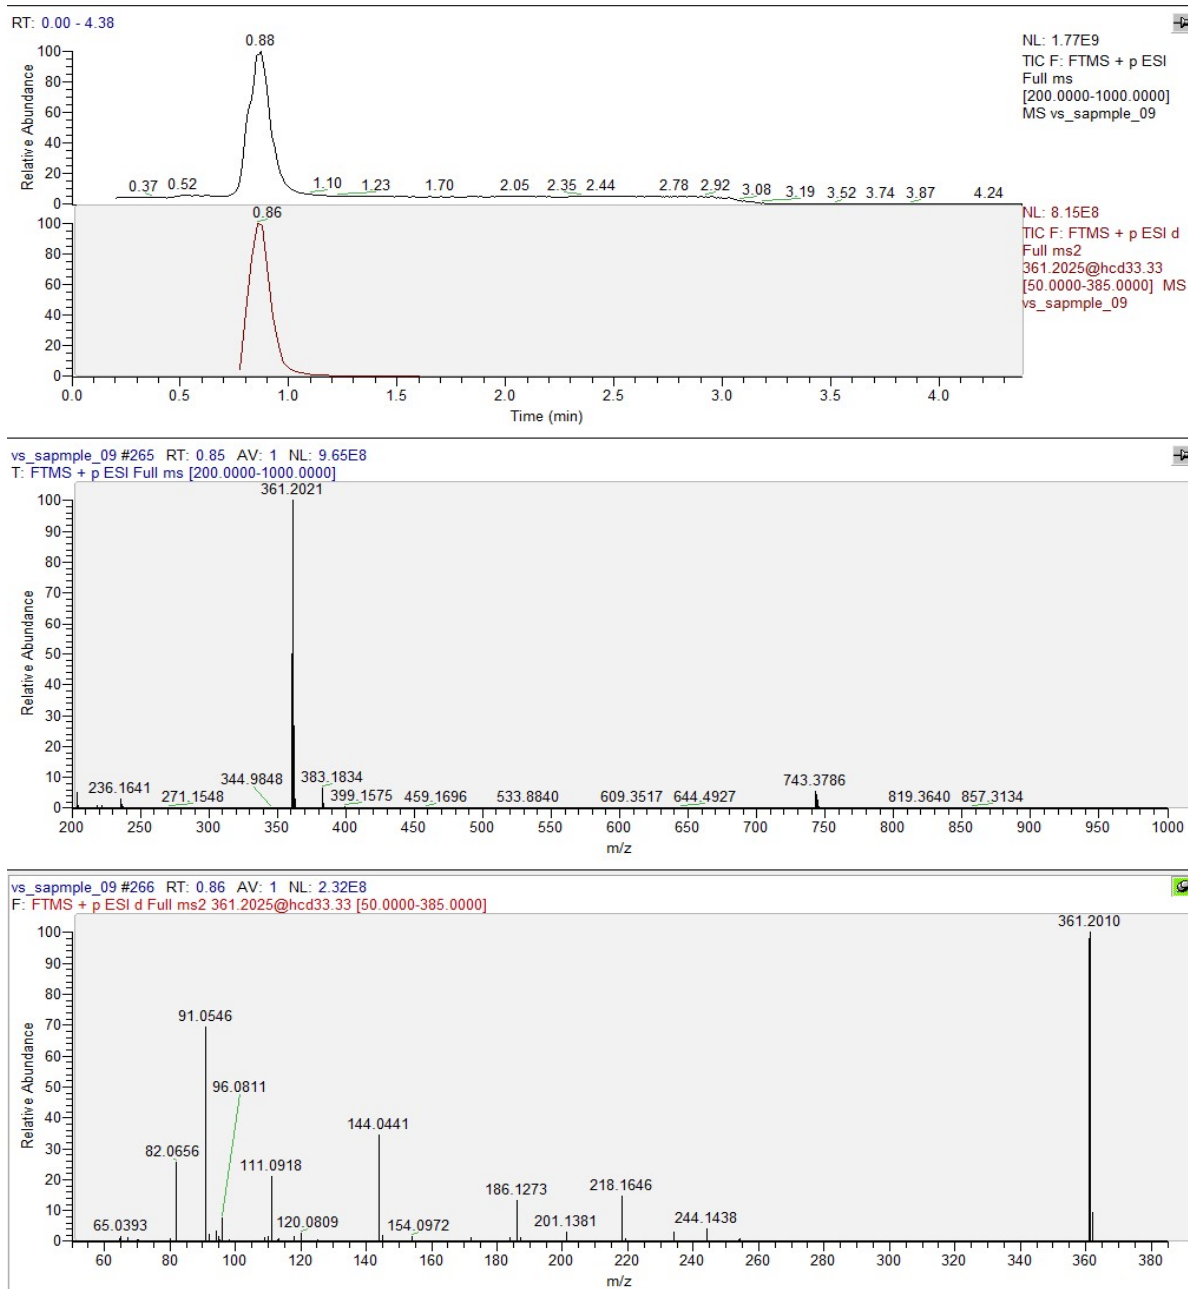

Figure S20. HRMS of compound 3c



#### 4. *N'*-(*E*)-(1-benzylpiperidin-4-yl)methylidene]-4-methoxybenzohydrazide, **3d**

Yield: 82%; m.p. 138-140°C.  $^1\text{H}$  NMR (600 MHz, DMSO- $d_6$ ):  $\delta$  = 1.49 (q,  $J$ =10.9 Hz, 2H) and 1.74 (d,  $J$ =11.6 Hz, 2H, H-2' and H6'), 2.01 (t,  $J$ =11.0 Hz, 2H) and 2.82 (d,  $J$ =11.2 Hz, 2H, H-3' and H-5'), 2.25 (d,  $J$ =4.7 Hz, 1H, H-1'), 3.47 (s, 2H, CH<sub>2</sub>), 3.82 (s, 3H, OCH<sub>3</sub>), 7.02 (d,  $J$ =8.6 Hz, 2H, H-3 and H-5), 7.25 (tt,  $J$ =2.0, 6.7 Hz, 1H, H-4'), 7.30-7.34 (m, 4H, H-2'', H-3'', H-5'' and H-6''), 7.67 (d,  $J$ =5.1 Hz, 1H, CH), 7.84 (d,  $J$ =8.8 Hz, 2H, H-2 and H-6), 11.28 (s, 1H, NH).

$^{13}\text{C}$  NMR (151 MHz, DMSO- $d_6$ ):  $\delta$  = 29.14 (C-2' and C-6'), 38.57 (C-1'), 52.48 (C-3' and C-5'), 55.37 (OCH<sub>3</sub>), 62.42 (CH<sub>2</sub>), 113.60 (C-3 and C-5), 125.58 (C-1), 126.82 (C-4'), 128.12 (C-3'' and C-5''), 128.76 (C-2'' and C-6''), 129.34 (C-2 and C-6), 138.51 (C-1'), 154.21 (CH), 161.80 (C-4), 162.23 (C=O). HRMS (ESI)  $m/z$ : calcd:  $[\text{M}+\text{H}]^+$  352.201953. Found:  $[\text{M}+\text{H}]^+$  352.20115

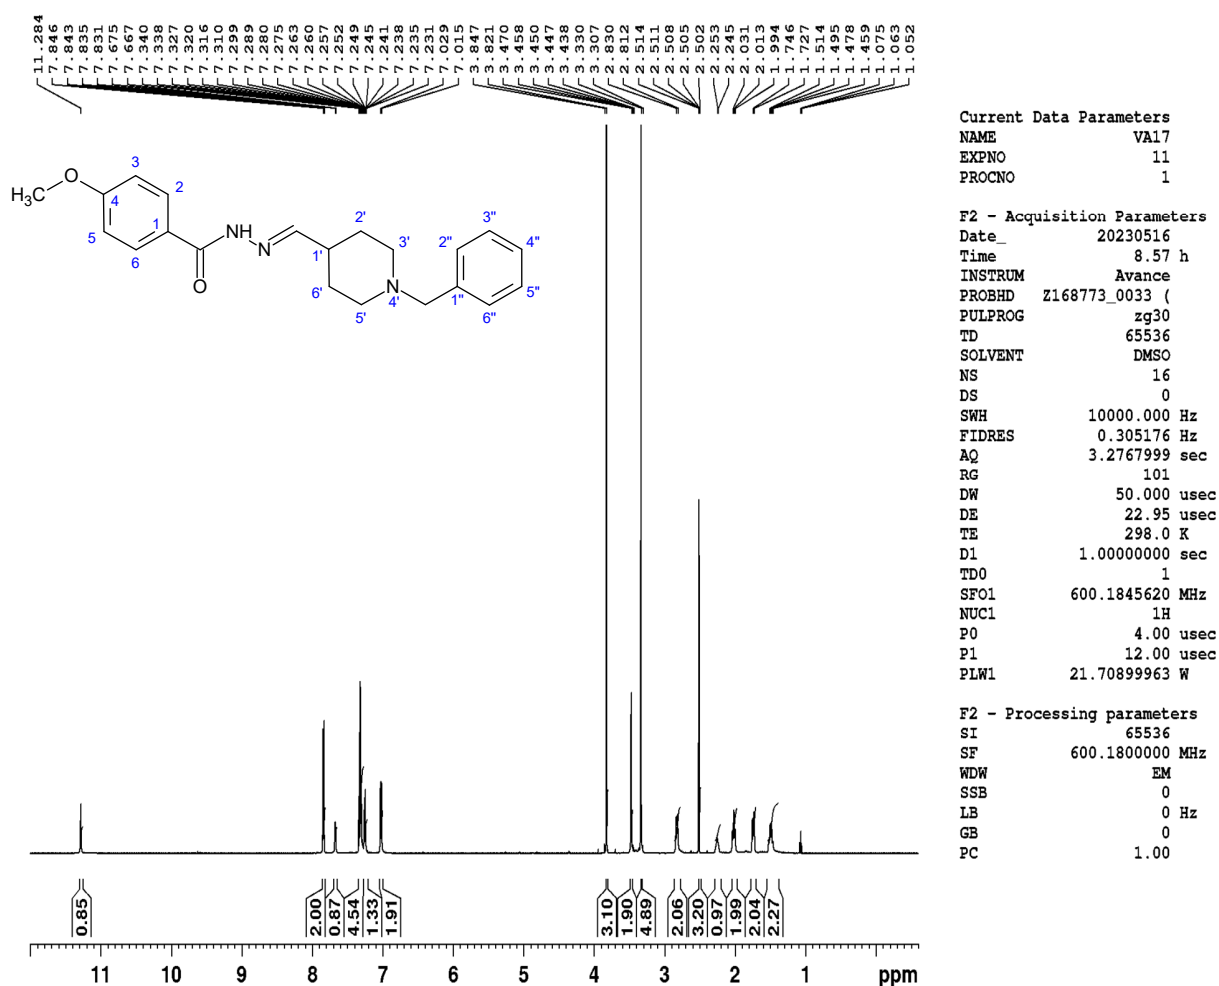

Figure S21.  $^1\text{H}$  NMR spectrum of compound **3d** in DMSO- $d_6$

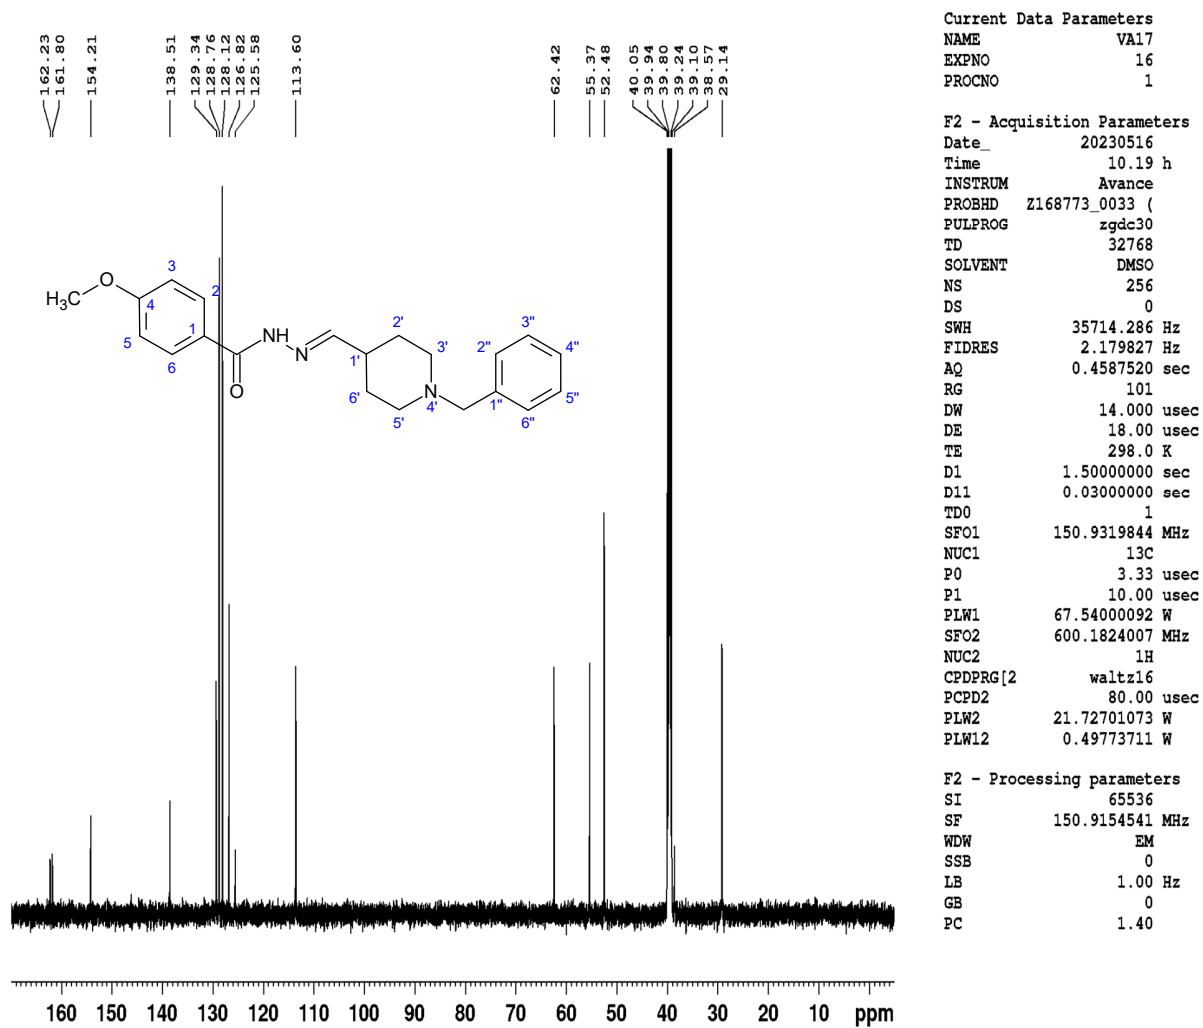

**Figure S22.**  $^{13}\text{C}$  NMR spectrum of compound **3d** in  $\text{DMSO-}d_6$

RT: 0.00 - 2.86

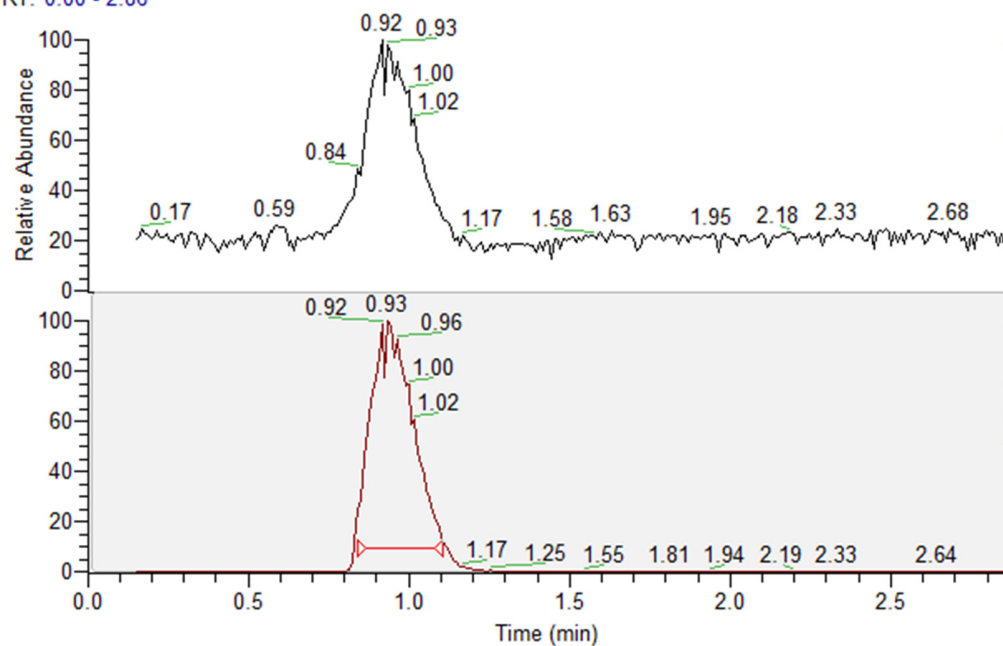

NL: 2.67E9  
TIC F: FTMS + p ESI  
Full ms  
[50.0000-750.0000] MS  
vs\_pos\_09

vs\_pos\_09 #76-99 RT: 0.86-1.07 AV: 24 NL: 7.75E8  
T: FTMS + p ESI Full ms [50.0000-750.0000]

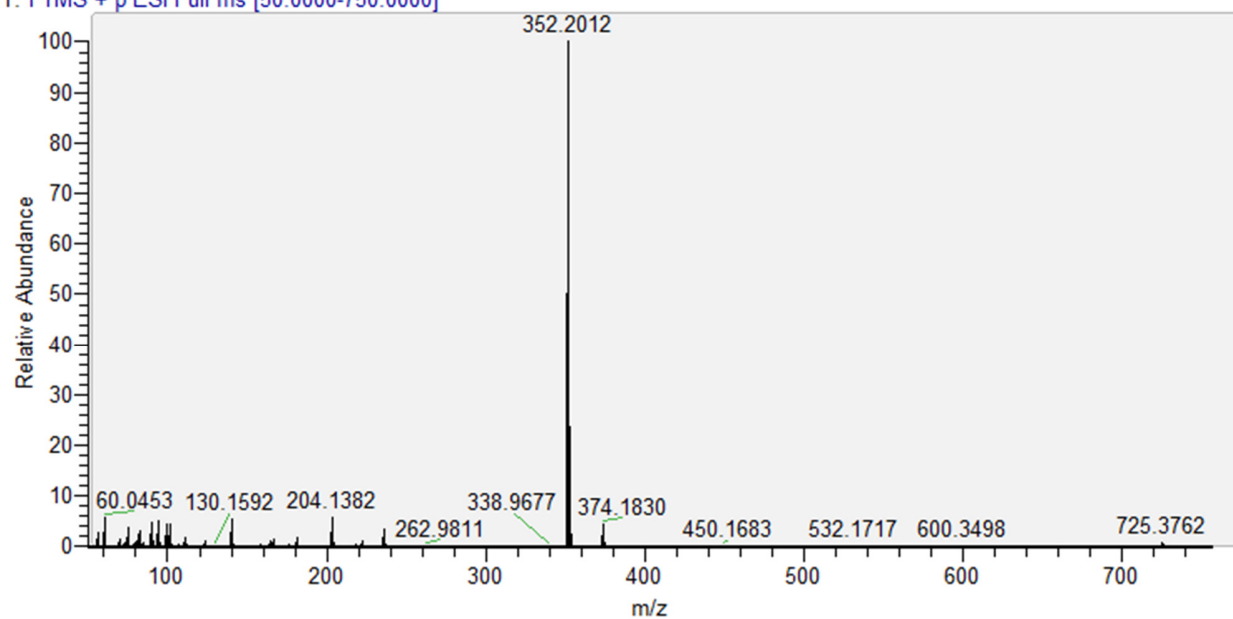

Figure S23. HRMS of compound **3d**

### 5. 1-benzyl-N'-[(E)-(4-hydroxyphenyl)methylidene]pyrrolidine-3-carbohydrazide, 3e

Yield: 84%; m.p. 240-241°C. <sup>1</sup>H NMR (600 MHz, DMSO-d<sub>6</sub>): 1:0.77 mixture of conformers; signals for major *synperiplanar* conformer around the amide bond: δ = 1.94-2.03 (m, 2H, H-4'), 2.40-2.42 (m, 2H, H-5'), 2.62-2.69 (m, 1H, 1/2H-2'), 2.88-2.91 (m, 1H, 1/2H-2'), 3.55-3.62 (m, 2H, CH<sub>2</sub>), 3.61-3.66 (m, 1H, H-3'), 6.79 (d, J=8.6 Hz, 2H, H-3 and H-5), 7.22-7.26 (m, 1H, H-4''), 7.30-7.33 (m, 4H, H-2'', H-3'', H-5'' and H-6''), 7.44 (d, J=8.7 Hz, 2H, H-2 and H-6), 7.85 (s, 1H, CH), 9.84 (bs, 1H, OH), 11.05 (s, 1H, NH); resolved signals for minor *antiperiplanar* conformer around the amide bond: 8.04 (s, 1H, CH), 9.87 (bs, 1H, OH), 11.10 (s, 1H, NH).

<sup>13</sup>C NMR (151 MHz, DMSO-d<sub>6</sub>): signals for major *synperiplanar* conformer around the amide bond: δ = 26.95 (C-4'), 41.47 (C-3'), 53.58 (C-5'), 56.43 (C-2'), 59.30 (CH<sub>2</sub>), 115.65 (C-3 and C-5), 125.37 (C-1), 126.75 (C-4''), 128.11 (C-2'' and C-6''), 128.28 (C-2 and C-6), 128.65 (C-3'' and C-5''), 139.16 (C-1''), 142.74 (CH), 158.99 (C-4), 175.01 (C=O); resolved signals for minor *antiperiplanar* conformer around the amide bond: 146.34 (CH), 159.22 (C-4), 169.78 (C=O). HRMS (ESI) m/z: calcd: [M+H]<sup>+</sup> 324.170653. Found: [M+H]<sup>+</sup> 324.1705

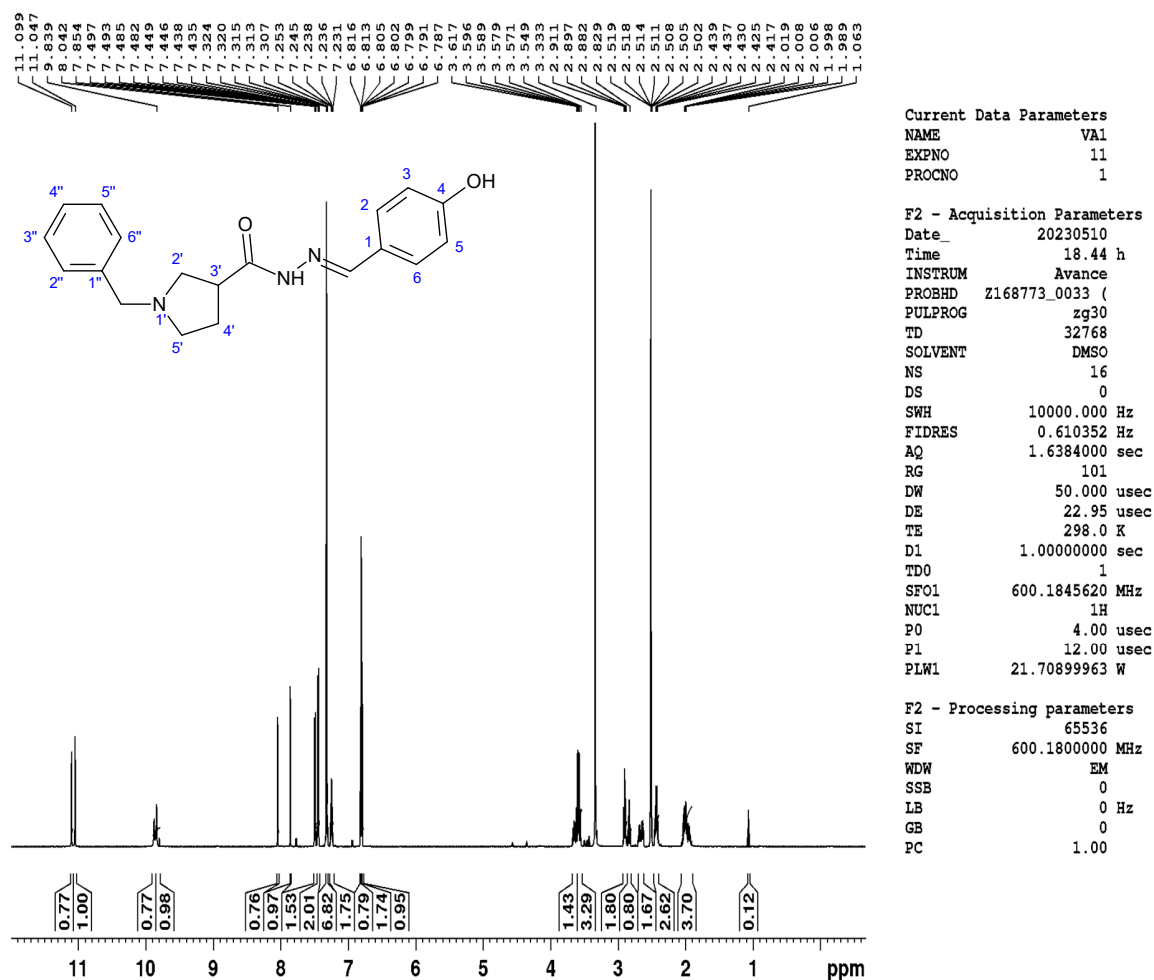

Figure S24. <sup>1</sup>H NMR spectrum of compound 3e in DMSO-d<sub>6</sub>

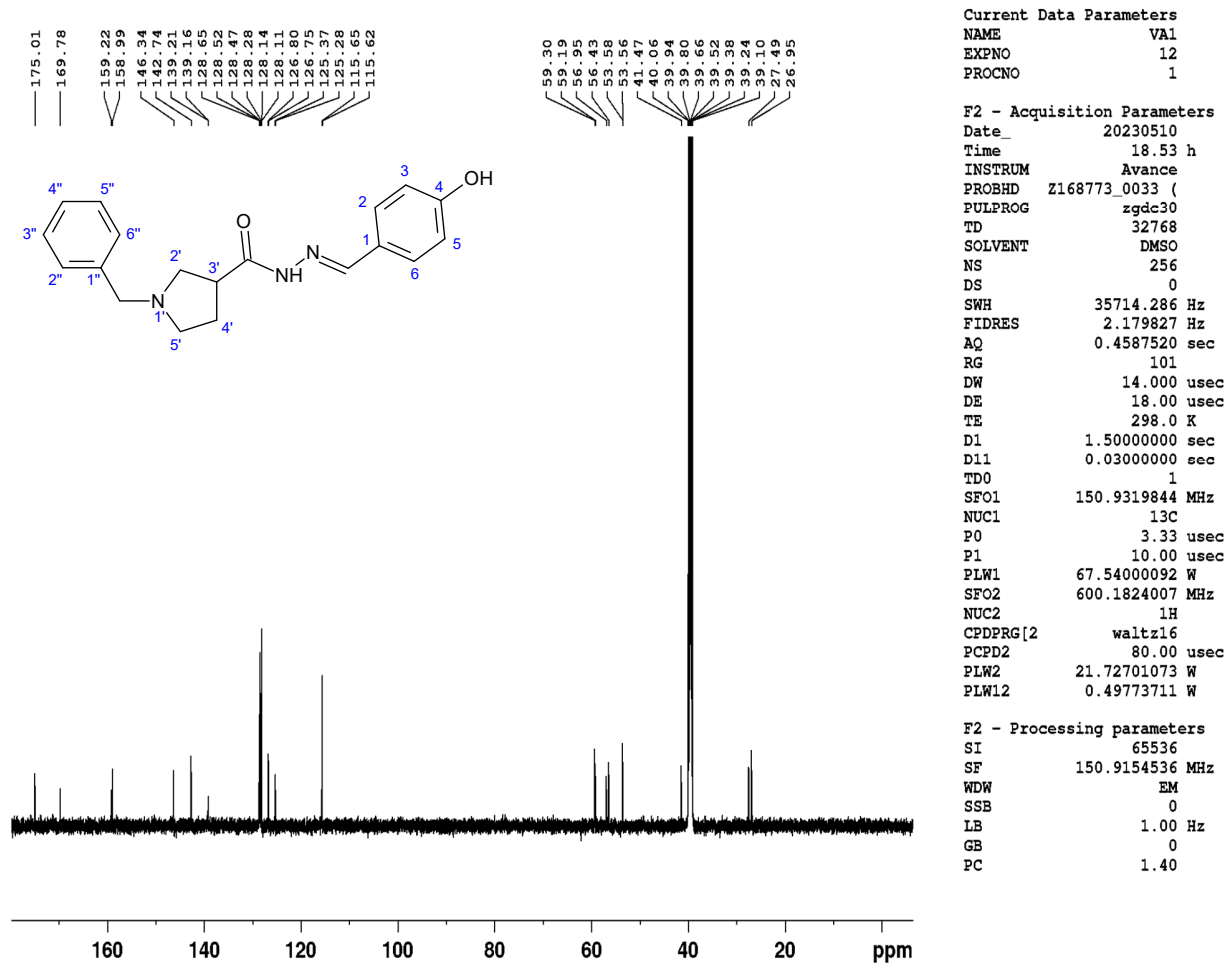

**Figure S25.**  $^{13}\text{C}$  NMR spectrum of compound **3e** in  $\text{DMSO-}d_6$

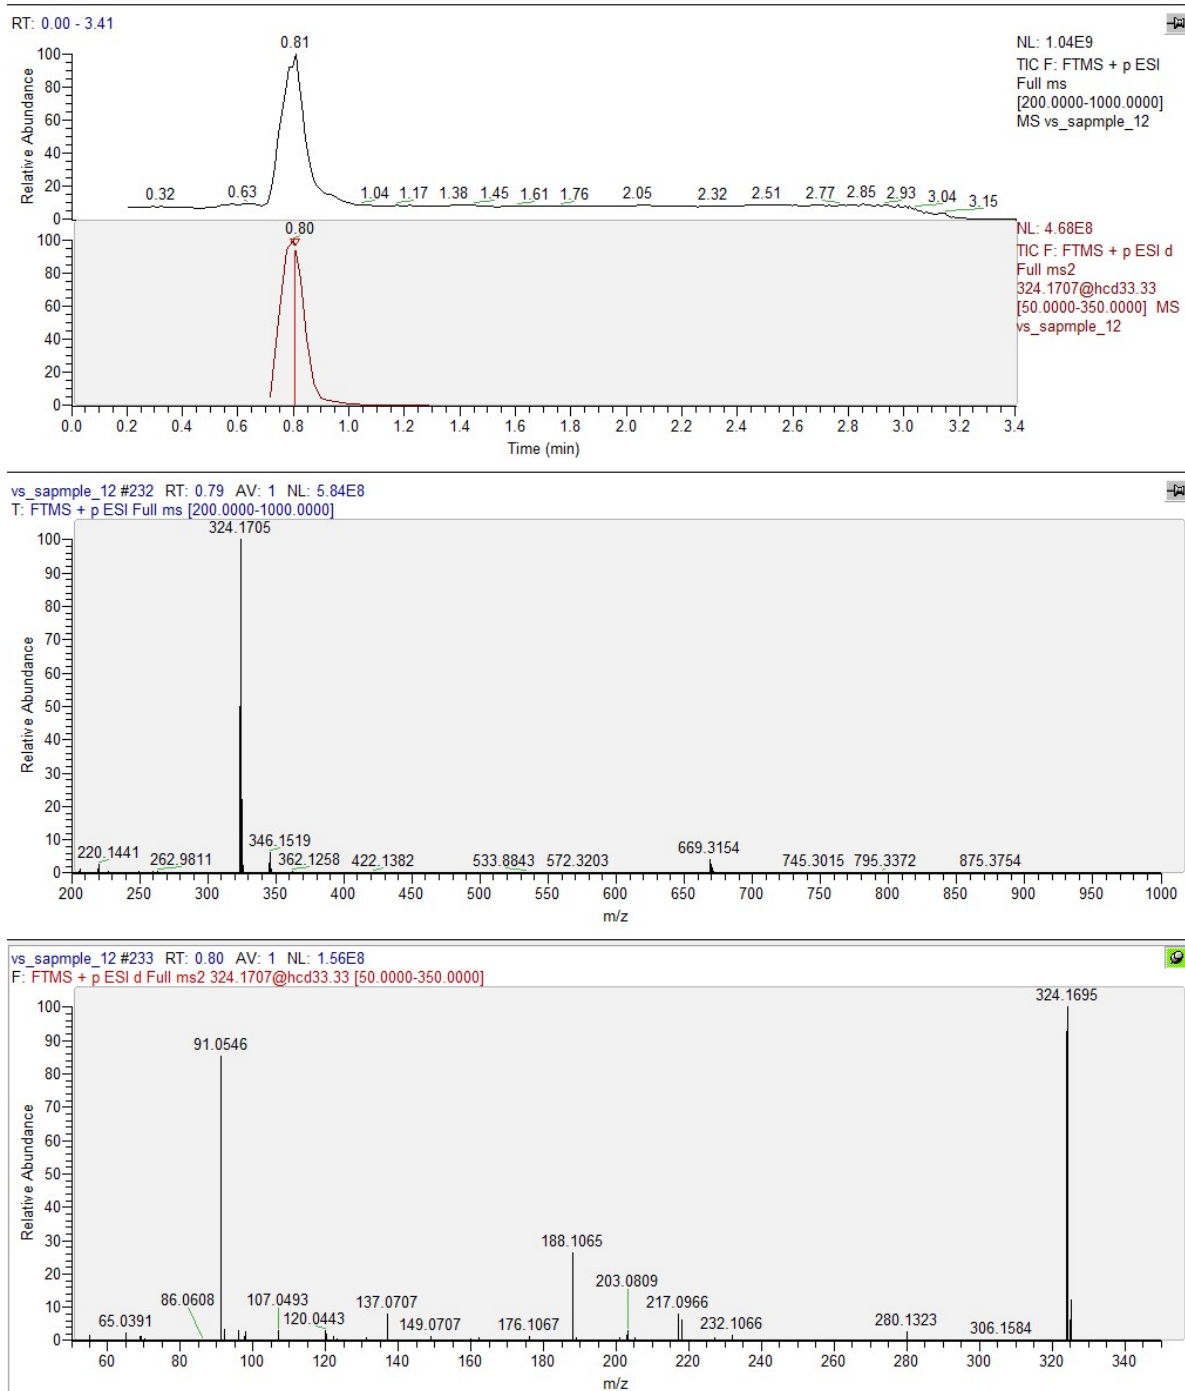

Figure S26. HRMS of compound 3e

## 6. 1-benzyl-N'-[(E)-(2,4-dihydroxyphenyl)methylidene]pyrrolidine-3-carbohydrazide, **3f**

Yield: 81%; m.p. 224-225°C.  $^1\text{H}$  NMR (600 MHz, DMSO- $d_6$ ):  $\delta$  = 1:0.39 mixture of conformers; signals for major *synperiplanar* conformer around the amide bond:  $\delta$  = 1.92-2.04 (m, 2H, H-4'), 2.41-2.48 (m, 2H, H-5'), 2.66-2.69 (m, 1H, 1/2H-2'), 2.82-2.94 (m, 1H, 1/2H-2'), 3.52-3.57 (m, 1H, H-3'), 3.57-3.61 (m, 2H, CH<sub>2</sub>), 6.29 (d,  $J$ =2.3 Hz, 1H, H-3), 6.33 (dd,  $J$ =8.4, 2.3 Hz, 1H, H-5), 7.25 (d,  $J$ =8.5 Hz, 1H, H-6), 7.29-7.33 (m, 5H, Ar), 8.21 (s, 1H, CH), 9.91 (bs, 1H, OH), 11.32 (s, 1H, OH), 11.36 (s, 1H, NH); resolved signals for minor *antiperiplanar* conformer around the amide bond: 8.11 (s, 1H, CH), 9.79 (bs, 1H, OH), 10.11 (bs, 1H, OH), 11.04 (s, 1H, NH).

$^{13}\text{C}$  NMR (151 MHz, DMSO- $d_6$ ): signals for major *synperiplanar* conformer around the amide bond:  $\delta$  = 27.47 (C-4'), 41.23 (C-3'), 53.52 (C-5'), 56.83 (C-2'), 59.17 (CH<sub>2</sub>), 102.58 (C-3), 107.57 (C-5), 110.41 (C-1), 126.81 (C-4''), 128.14 (C-2'' and C-6''), 128.51 (C-3'' and C-5''), 131.16 (C-6), 139.17 (C-1'), 147.58 (CH), 159.27 (C-2), 160.52 (C-4), 169.58 (C=O); resolved signals for minor *antiperiplanar* conformer around the amide bond: 141.95 (CH), 157.97 (C-2), 160.22 (C-4), 174.44 (C=O). HRMS (ESI)  $m/z$ : calcd:  $[\text{M}+\text{H}]^+$  340.165568. Found:  $[\text{M}+\text{H}]^+$  340.1655

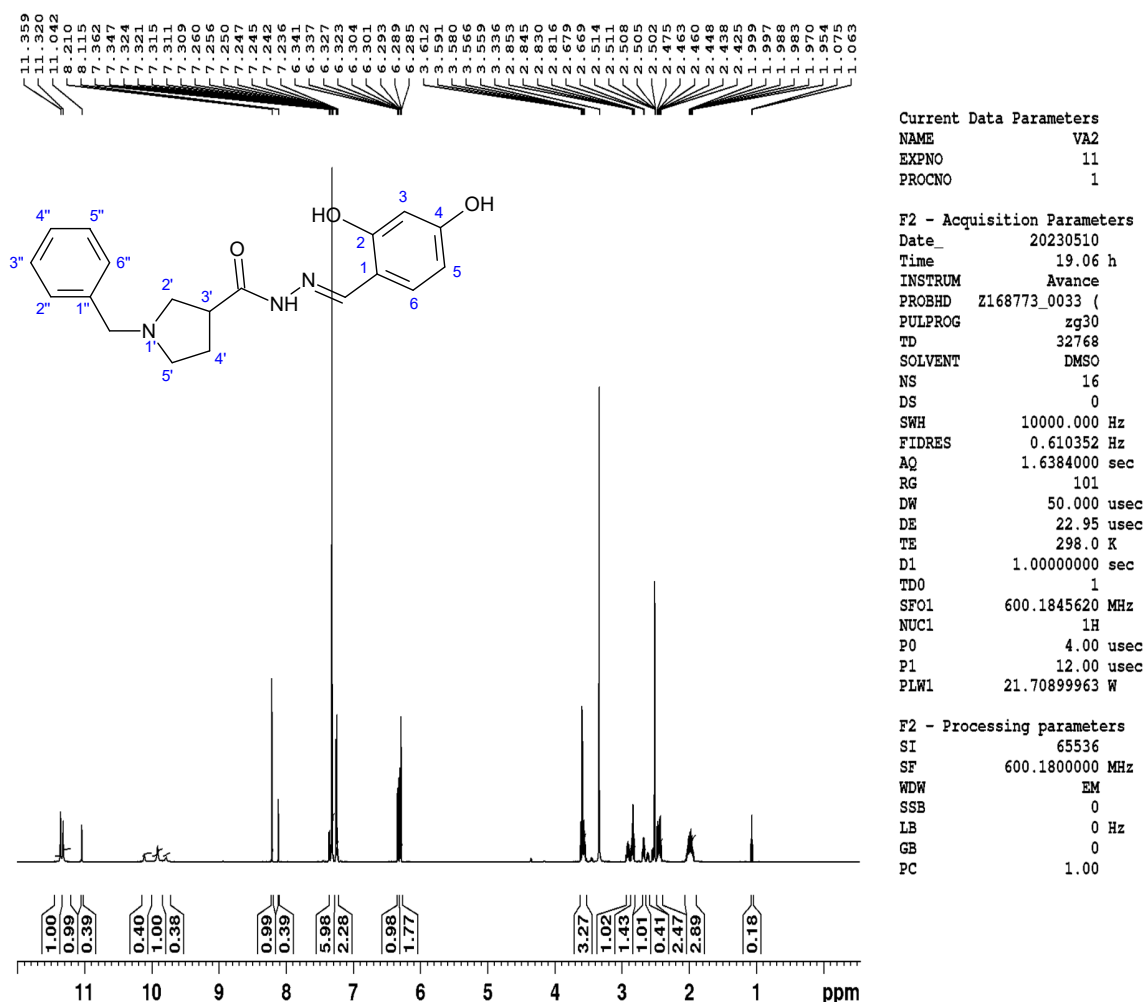

Figure S27.  $^1\text{H}$  NMR spectrum of compound **3f** in DMSO- $d_6$

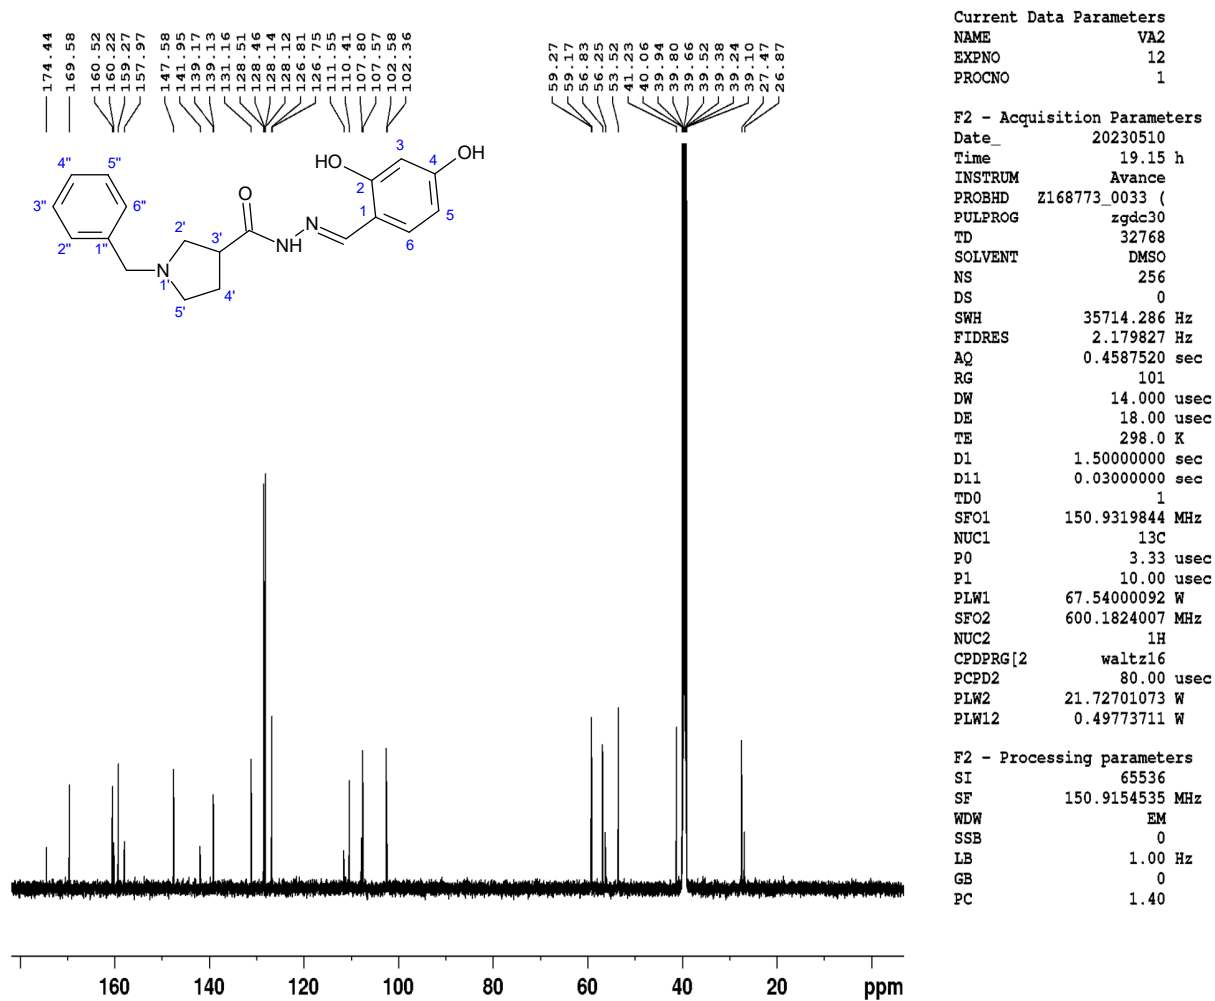

**Figure S28.**  $^{13}\text{C}$  NMR spectrum of compound **3f** in  $\text{DMSO}-d_6$



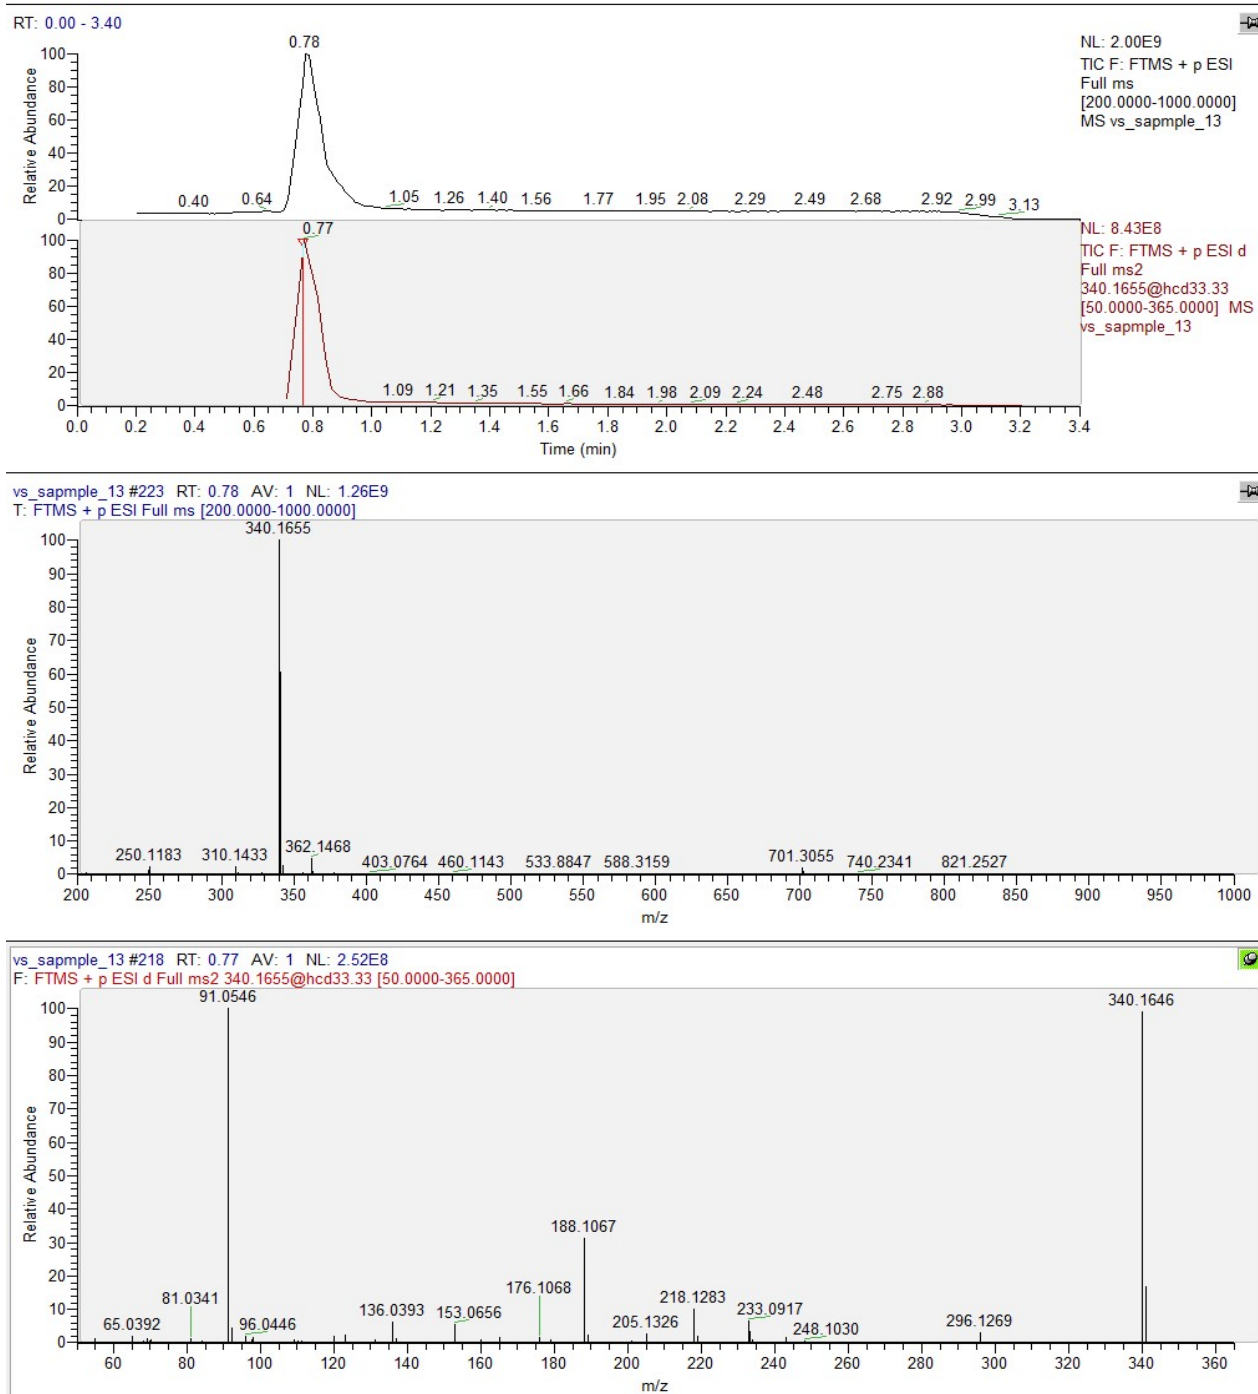

Figure S29. HRMS of compound 3f

## 7. 1-benzyl-N'-[(E)-(3,4-dihydroxyphenyl)methylidene]pyrrolidine-3-carbohydrazide, **3g**

Yield: 72%; m.p. 199-201°C.  $^1\text{H}$  NMR (600 MHz, DMSO- $d_6$ ): 1:0.65 mixture of conformers; signals for major *synperiplanar* conformer around the amide bond:  $\delta$  = 2.57 (m,  $J$ =8.3 Hz, 2H, H-4'), 2.63 (d,  $J$ =8.45 Hz, 2H, H-5'), 3.32-3.37 (m, 1H, H-2'), 3.57 (t,  $J$ =9.5 Hz, 1H, H-2''), 3.91 (dq,  $J$ =6.2, 8.6 Hz, 1H, H-3'), 4.35 (d,  $J$ =15.0 Hz, 1H) and 4.46 (d,  $J$ =15.0 Hz, 1H, CH<sub>2</sub>), 6.75 (dd,  $J$ =0.6, 7.7 Hz, 1H, H-5), 6.89 (dd,  $J$ =1.2, 8.3 Hz, 1H, H-6), 7.09 (s, 1H, H-2), 7.23-7.25 (m, 2H, H-2'' and H-6''), 7.27-7.30 (m, 1H, H-4''), 7.34-7.37 (m, 2H, H-3'' and H-5''), 7.80 (s, 1H, CH), 9.15 (bs, 1H, OH), 9.39 (bs, 1H, OH), 11.23 (s, 1H, NH); resolved signals for minor *antiperiplanar* conformer around the amide bond: 7.96 (s, 1H, CH), 9.24 (bs, 1H, OH), 9.37 (bs, 1H, OH), 11.26 (s, 1H, NH).

$^{13}\text{C}$  NMR (151 MHz, DMSO- $d_6$ ): signals for major *synperiplanar* conformer around the amide bond:  $\delta$  = 33.54 (C-3'), 35.41 (C-4'), 45.79 (CH<sub>2</sub>), 48.98 (C-5'), 49.37 (C-2'), 113.21 (C-2), 116.05 (C-5), 120.37 (C-6), 126.02 (C-1), 127.73 (C-4''), 128.05 (C-2'' and C-6''), 129.06 (C-3'' and C-5''), 137.24 (C-1''), 144.49 (CH), 146.11 (C-3), 148.17 (C-4), 172.83 (C=O); resolved signals for minor *antiperiplanar* conformer around the amide bond: 147.81 (CH), 146.15 (C-3), 148.43 (C-4), 173.81 (C=O). HRMS (ESI)  $m/z$ : calcd: [M+H]<sup>+</sup> 340.165568. Found: [M+H]<sup>+</sup> 340.1646

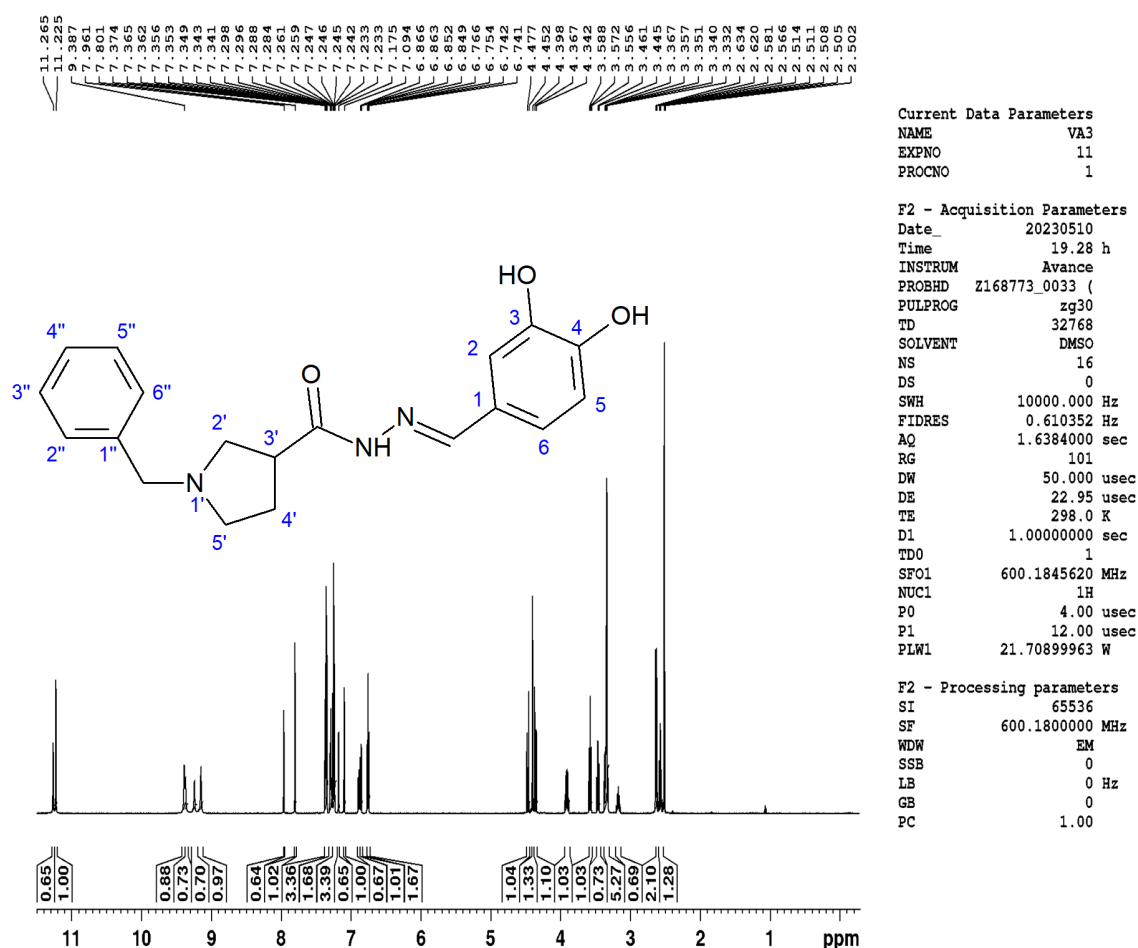

**Figure S30.**  $^1\text{H}$  NMR spectrum of compound **3g** in DMSO- $d_6$

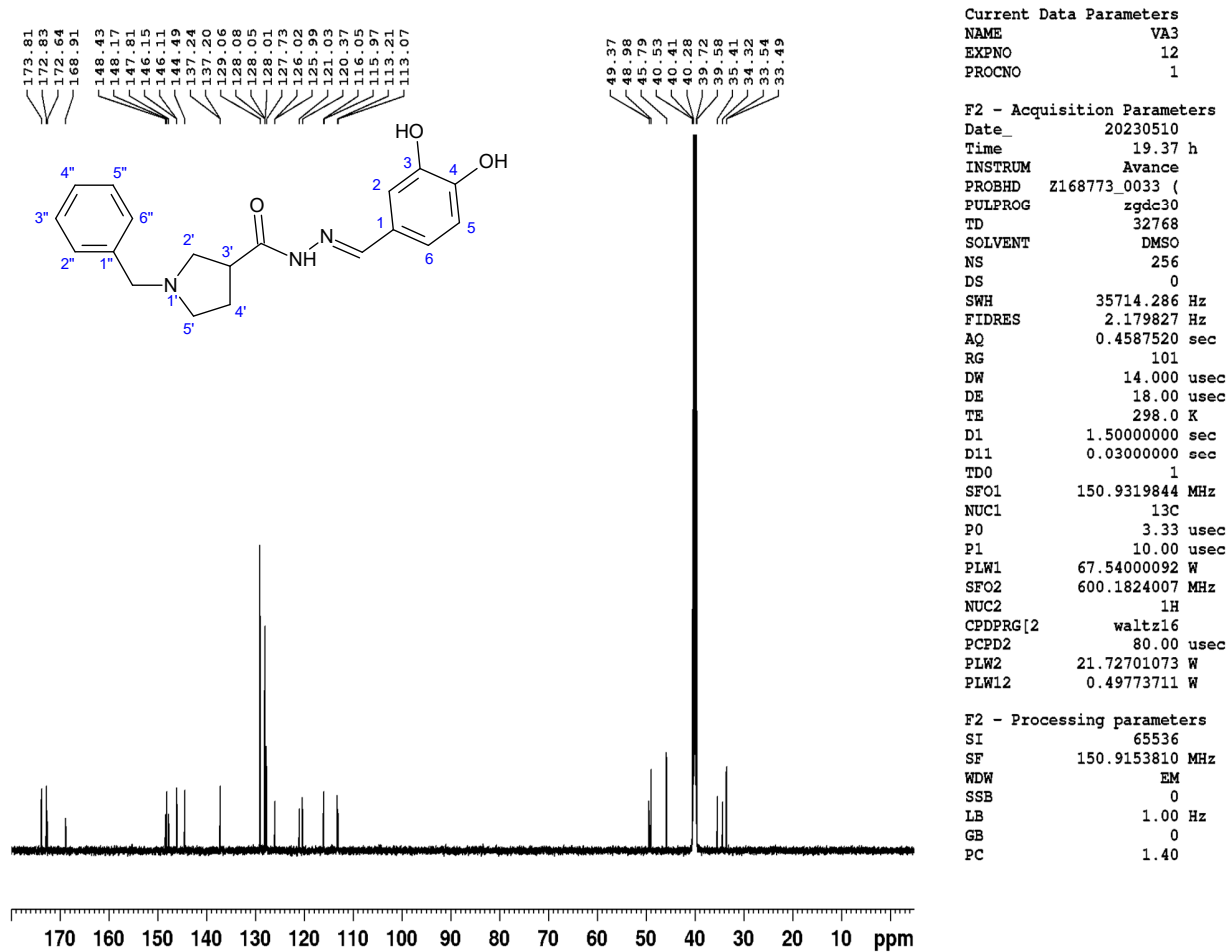

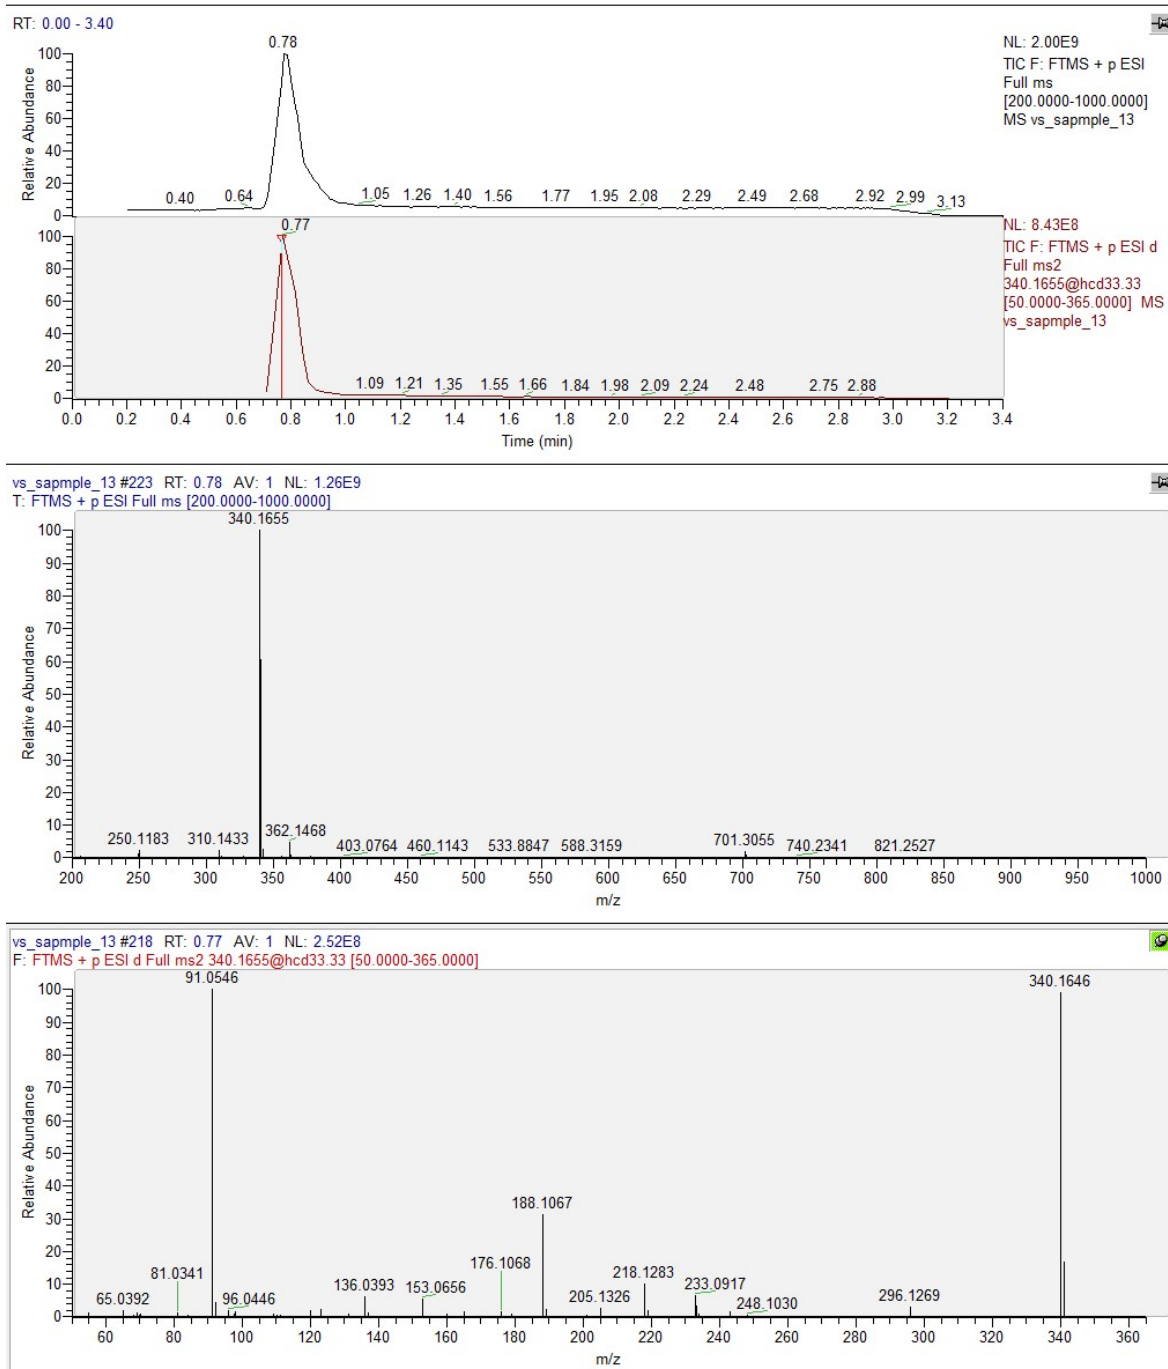**Figure S32.** HRMS of compound **3g**

**8. 1-benzyl-N'-[(E)-(2,4,6-trihydroxyphenyl)methylidene]pyrrolidine-3-carbohydrazide, 3h**

Yield: 65%; m.p. 215-217°C.  $^1\text{H}$  NMR (600 MHz, DMSO- $d_6$ ): 1:0.19 mixture of conformers; signals for major *synperiplanar* conformer around the amide bond:  $\delta$  = 1.91-2.03 (m, 2H, H-4'), 2.41-2.47 (m, 2H, H-5'), 2.66-2.69 (m, 1H, H-2'), 2.81-2.85 (m, 1H, H-2'), 2.85-2.91 (m, 1H, H-3'), 3.57 (d,  $J$ =12.8 Hz, 1H) and 3.60 (d,  $J$ =13.0 Hz, 1H, CH<sub>2</sub>), 5.81 (s, 2H, H-3 and H-5), 7.23-7.27 (m, 1H, H-4''), 7.30-7.33 (m, 4H, H-2'', H-3'', H-5'' and H-6''), 8.49 (s, 1H, CH), 9.77 (bs, 1H, OH), 10.95 (bs, 2H, OH), 11.33 (s, 1H, NH); resolved signals for minor *antiperiplanar* conformer around the amide bond: 8.37 (s, 1H, CH), 9.80 (bs, 1H, OH), 10.51 (bs, 2H, OH), 11.12 (s, 1H, NH).

$^{13}\text{C}$  NMR (151 MHz, DMSO- $d_6$ ): signals for major *synperiplanar* conformer around the amide bond:  $\delta$  = 27.47 (C-3'), 41.19 (CH<sub>2</sub>), 53.50 (C-4'), 56.81 (C-5'), 59.16 (C-2'), 94.29 (C-3 and C-5), 98.80 (C-1), 126.81 (C-4''), 128.14 (C-2'' and C-6''), 128.51 (C-3'' and C-5''), 139.12 (C-1''), 145.15 (CH), 159.48 (C-2 and C-6), 161.34 (C-4), 169.21 (C=O). HRMS (ESI)  $m/z$ : calcd:  $[\text{M}+\text{H}]^+$  356.160483. Found:  $[\text{M}+\text{H}]^+$  356.1604

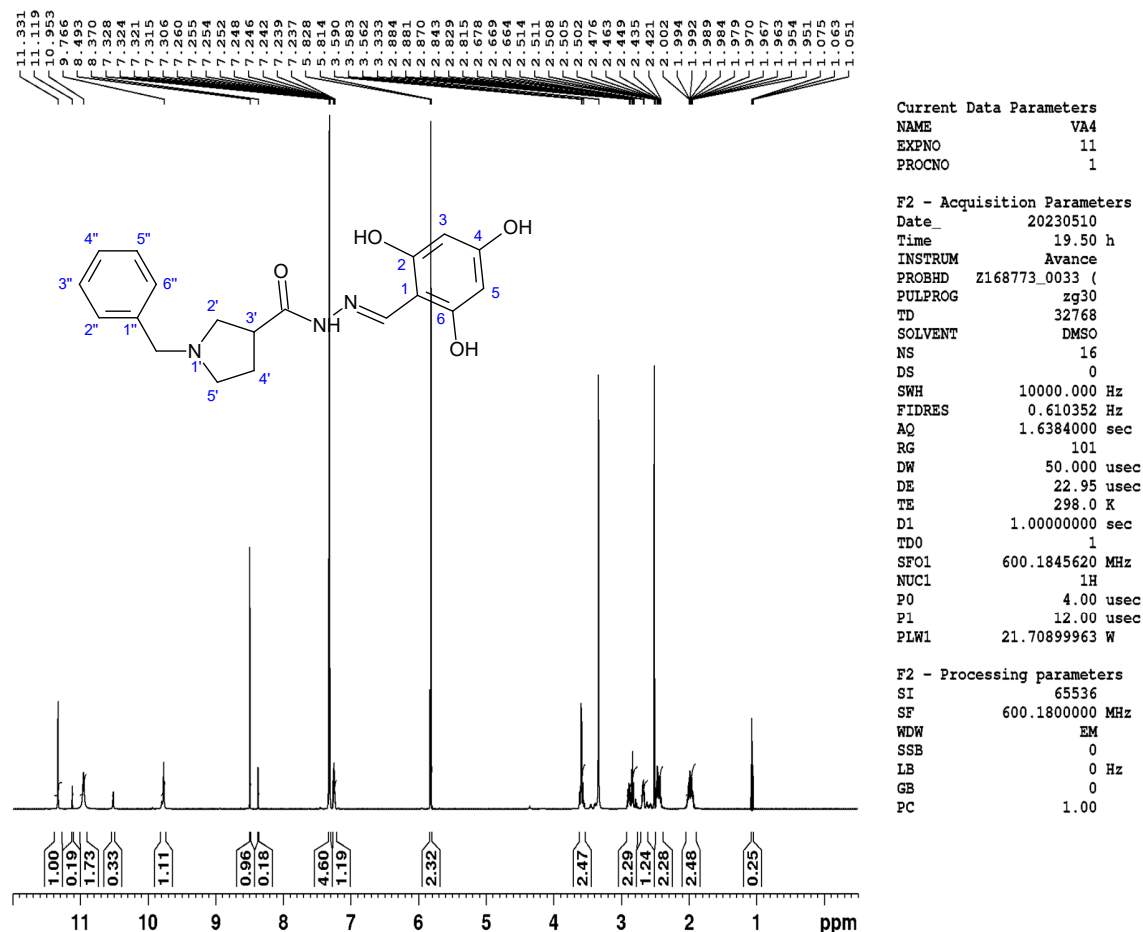

**Figure S33.**  $^1\text{H}$  NMR spectrum of compound **3h** in DMSO- $d_6$

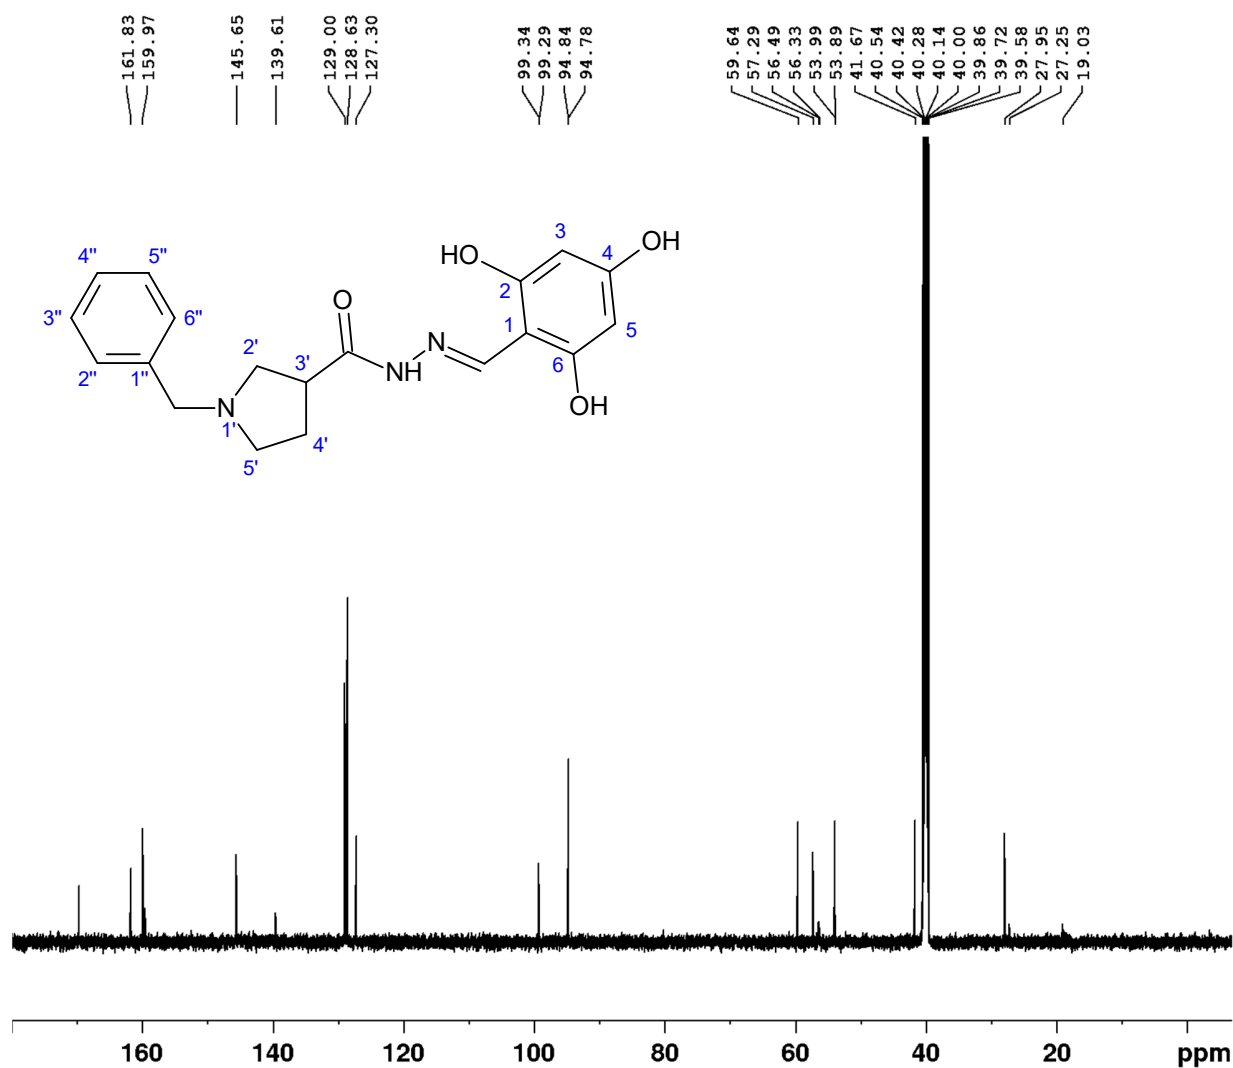

**Figure S34.**  $^{13}\text{C}$  NMR spectrum of compound **3h** in  $\text{DMSO}-d_6$

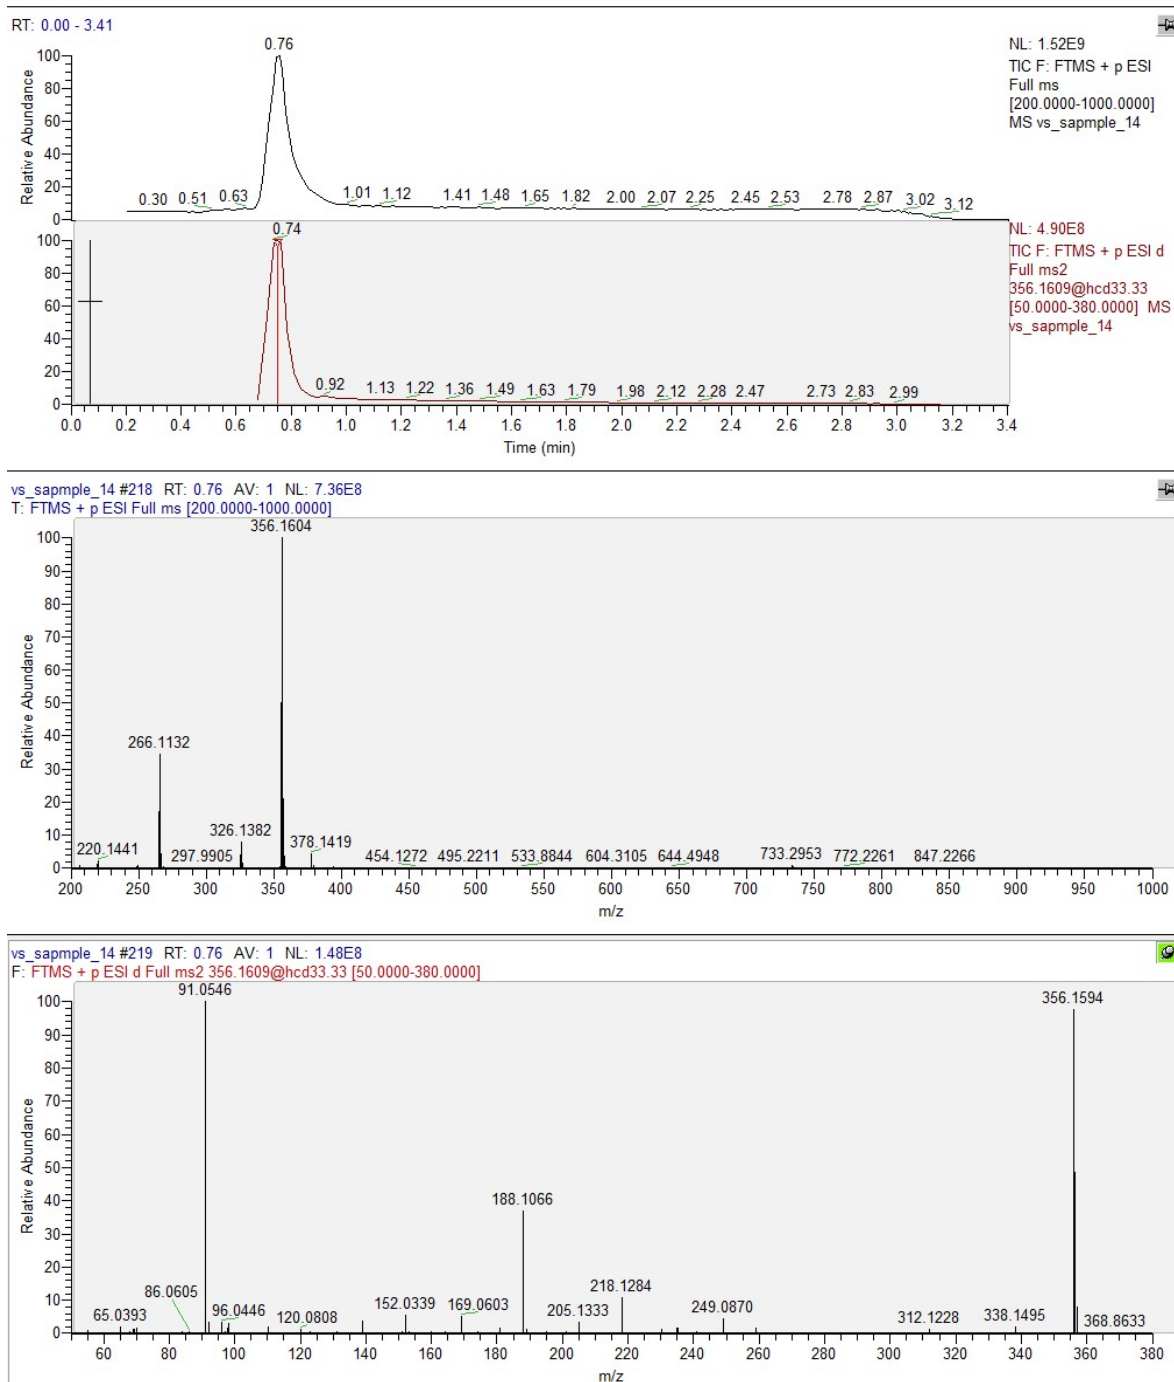

**Figure S35.** HRMS of compound **3h**

9. *tert-butyl (2-((2E)-2-[(1-benzyl-1H-indol-3-yl)methylidene]hydrazinyl)-2-oxoethyl)carbamate*, **3i** <sup>1</sup>H NMR, <sup>13</sup>C NMR and HRMS spectra of compound **3i** can be found in <https://doi.org/10.1007/s00044-019-02293-w>

**10. tert-butyl (2-((2E)-2-[(5-methoxy-1-methyl-1H-indol-3-yl)methylidene]hydrazinyl)-2-oxoethyl)carbamate, 3j**

Yield: 48%; m.p. 203-206°C.  $^1\text{H}$  NMR (600 MHz, DMSO- $d_6$ ): 1:0.28 mixture of conformers; signals for major *synperiplanar* conformer around the amide bond:  $\delta$  = 1.41 (s, 9H, CH<sub>3</sub>), 3.79 (s, 3H, OCH<sub>3</sub>), 4.16 (d, J=6.0 Hz, 2H, CH<sub>2</sub>), 6.76 (t, J=5.9 Hz, 1H, H-4), 6.85 (dd, J=2.6, 8.8 Hz, 1H, H-6), 7.34 (d, J=8.8 Hz, 1H, H-7), 7.62 (d, J=2.4 Hz, 1H, H-4), 7.72 (d, J=2.9 Hz, 1H, C-2), 8.14 (s, 1H, CH), 11.00 (s, 1H, NH), 11.40 (bs, 1H, NH); resolved signals for minor *antiperiplanar* conformer around the amide bond: 8.35 (s, 1H, CH), 11.09 (s, 1H, NH), 11.40 (bs, 1H, NH).

$^{13}\text{C}$  NMR (151 MHz, DMSO- $d_6$ ): signals for major *synperiplanar* conformer around the amide bond:  $\delta$  = 28.22 (CH<sub>3</sub>), 41.39 (CH<sub>2</sub>), 55.05 (OCH<sub>3</sub>), 77.88 (OC), 103.48 (C-4), 111.10 (C-3), 112.16 (C-7), 112.53 (C-6), 124.63 (C-3a), 130.50 (C-2), 131.93 (C-7a), 140.68 (CH), 154.37 (C-5), 155.89 (OC=O), 169.74 (C=O). HRMS (ESI) m/z: calcd: [M+H]<sup>+</sup> 347.171382. Found: [M+H]<sup>+</sup> 347.1712

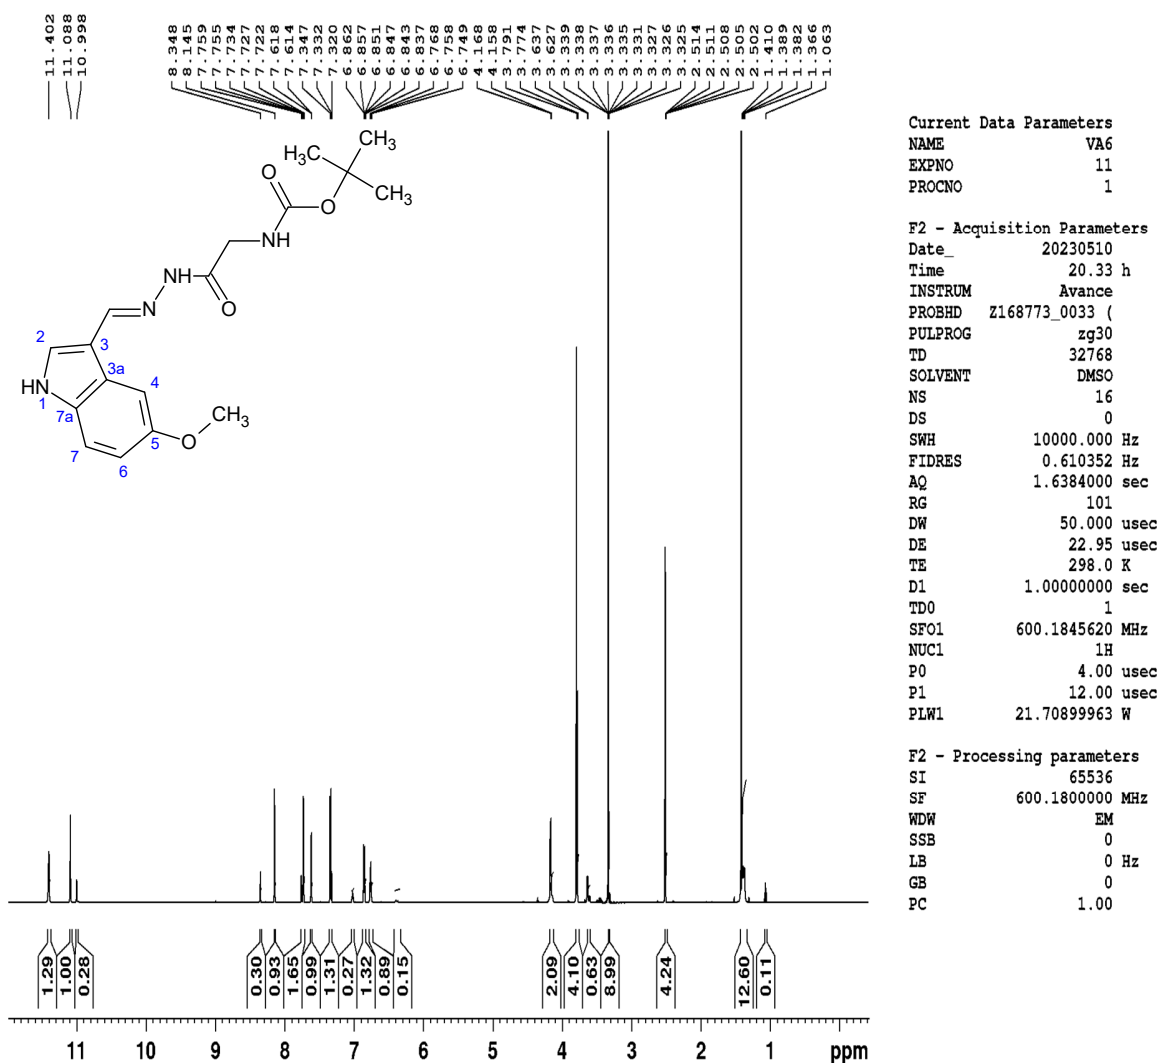

**Figure S36.**  $^1\text{H}$  NMR spectrum of compound **3j** in DMSO- $d_6$



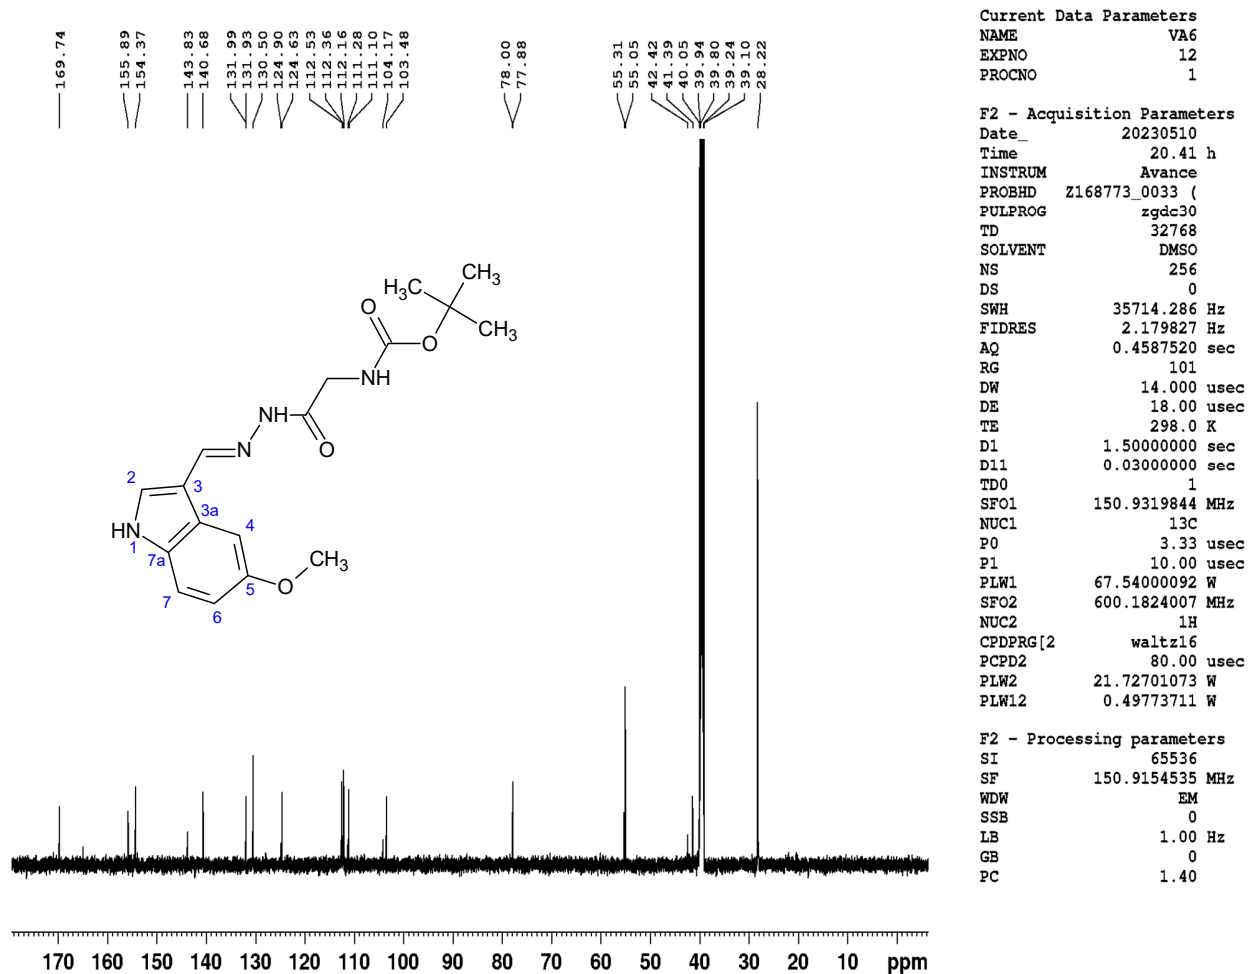

Figure S37. <sup>13</sup>C NMR spectrum of compound **3j** in DMSO-*d*<sub>6</sub>

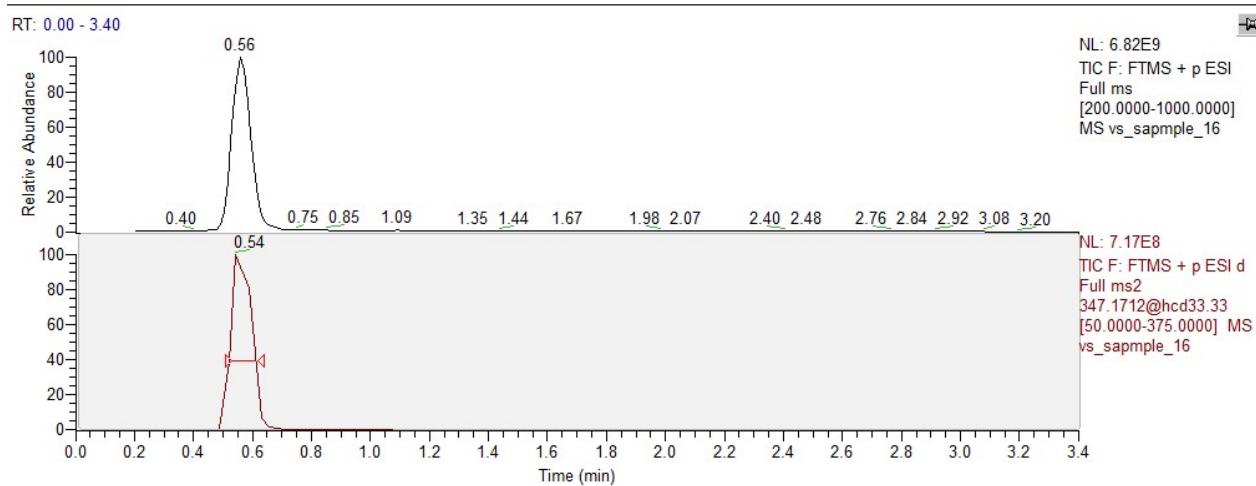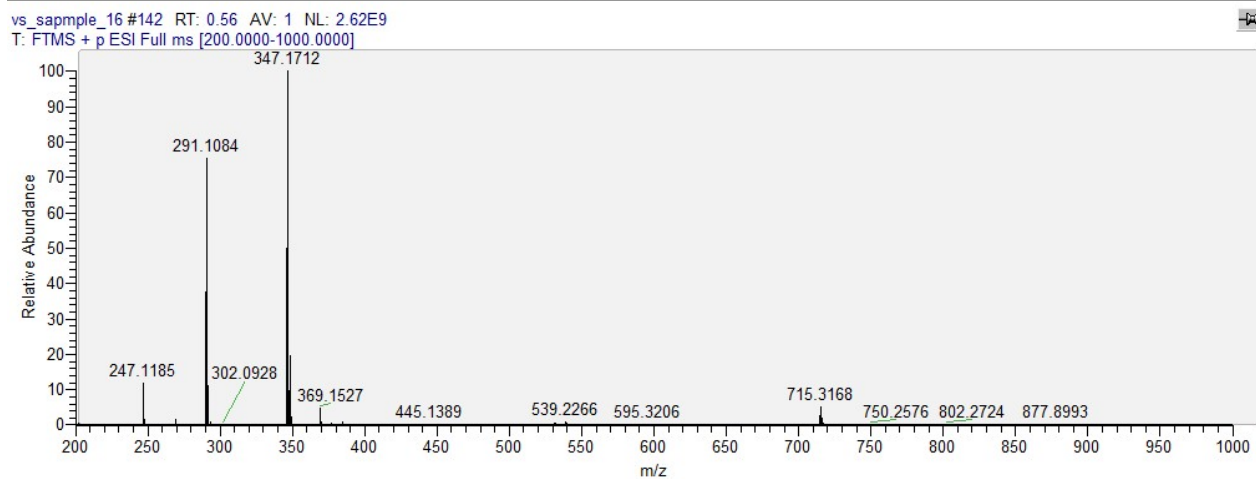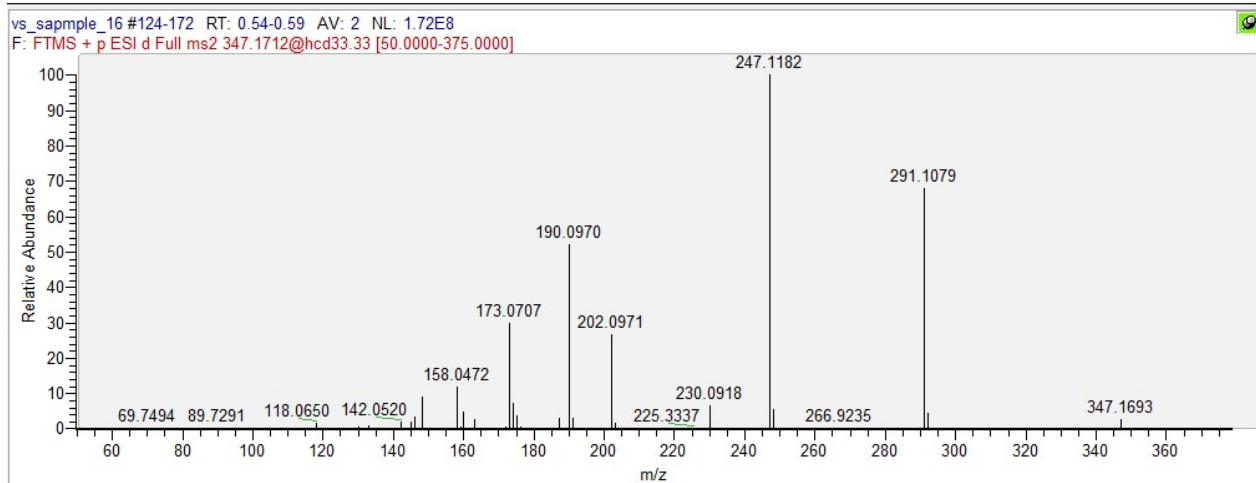

Figure S38. HRMS of compound 3j

**11. tert-butyl (2-((2E)-2-[(5-methoxy-1H-indol-3-yl)methylidene]hydrazinyl)-2-oxoethyl)carbamate, 3k**

Yield: 83%; m.p. 197-199°C. <sup>1</sup>H NMR (600 MHz, DMSO-d<sub>6</sub>): 1:0.33 mixture of conformers; signals for major *synperiplanar* conformer around the amide bond: δ = 1.41 (s, 9H, CH<sub>3</sub>), 3.78 (s, 3H, NCH<sub>3</sub>), 3.80 (s, 3H, OCH<sub>3</sub>), 4.16 (d, J=5.9 Hz, 2H, CH<sub>2</sub>), 6.76 (t, J=5.9 Hz, 1H, NH), 6.92 (dd, J=2.6, 8.8 Hz, 1H, H-6), 7.41 (d, J=8.8 Hz, 1H, H-7), 7.62 (d, J=2.5 Hz, 1H, H-4), 7.71 (s, 1H, C-2), 8.11 (s, 1H, CH), 11.07 (s, 1H, NH); resolved signals for minor *antiperiplanar* conformer around the amide bond: 8.32 (s, 1H, CH), 11.00 (1H, s),

<sup>13</sup>C NMR (151 MHz, DMSO-d<sub>6</sub>): signals for major *synperiplanar* conformer around the amide bond: δ = 28.01 (CH<sub>3</sub>), 32.91 (NCH<sub>3</sub>), 41.38 (CH<sub>2</sub>), 55.11 (OCH<sub>3</sub>), 77.88 (OC), 103.66 (C-4), 109.95 (C-3), 111.05 (C-7), 112.10 (C-6), 125.01 (C-3a), 132.65 (C-7a), 134.03 (C-2), 140.20 (CH), 154.65 (C-5), 155.89 (OC=O), 169.72 (C=O). HRMS (ESI) m/z: calcd: [M+H]<sup>+</sup> 361.187032. Found: [M+H]<sup>+</sup> 361.1869

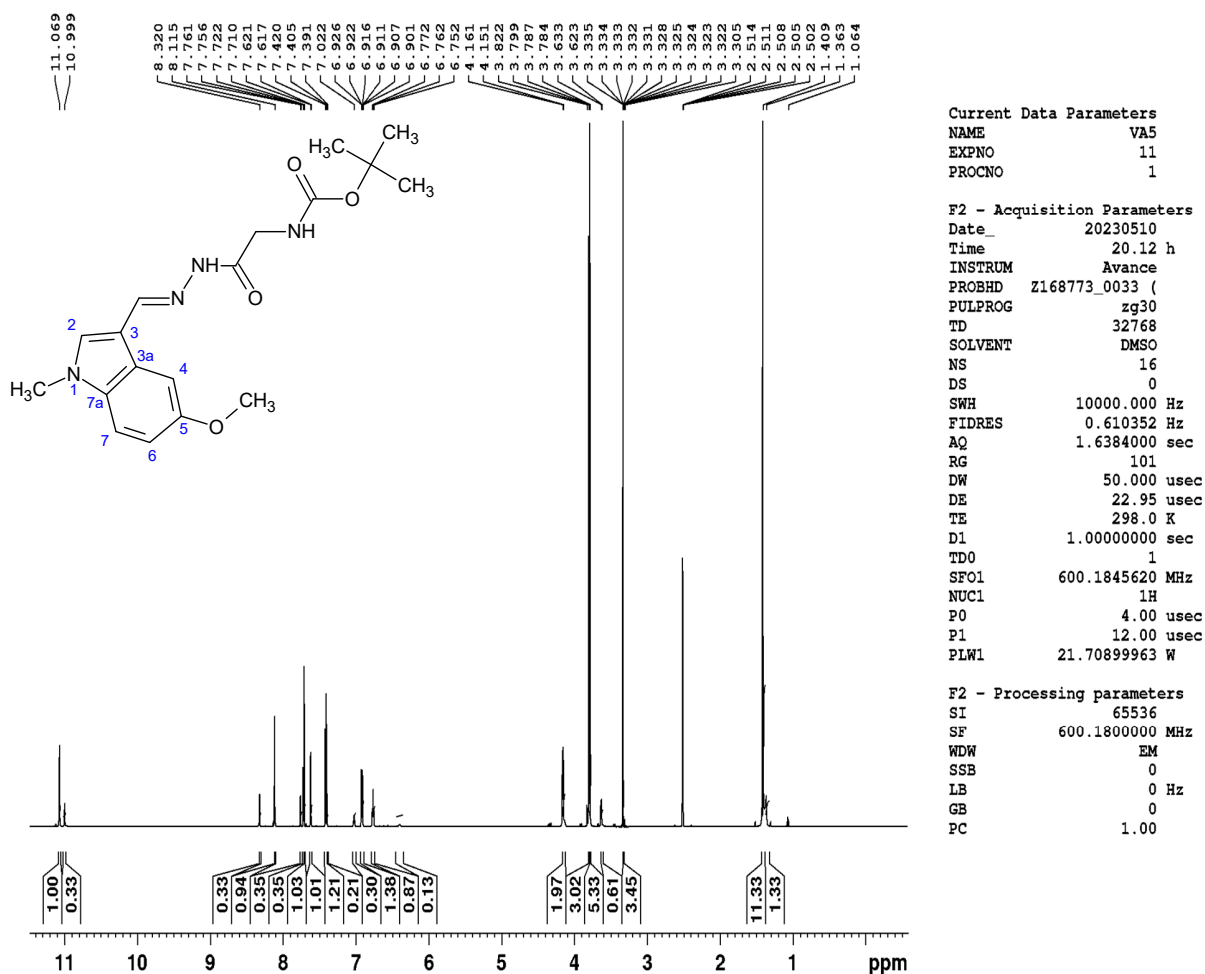

**Figure S39.** <sup>1</sup>H NMR spectrum of compound **3k** in DMSO-d<sub>6</sub>

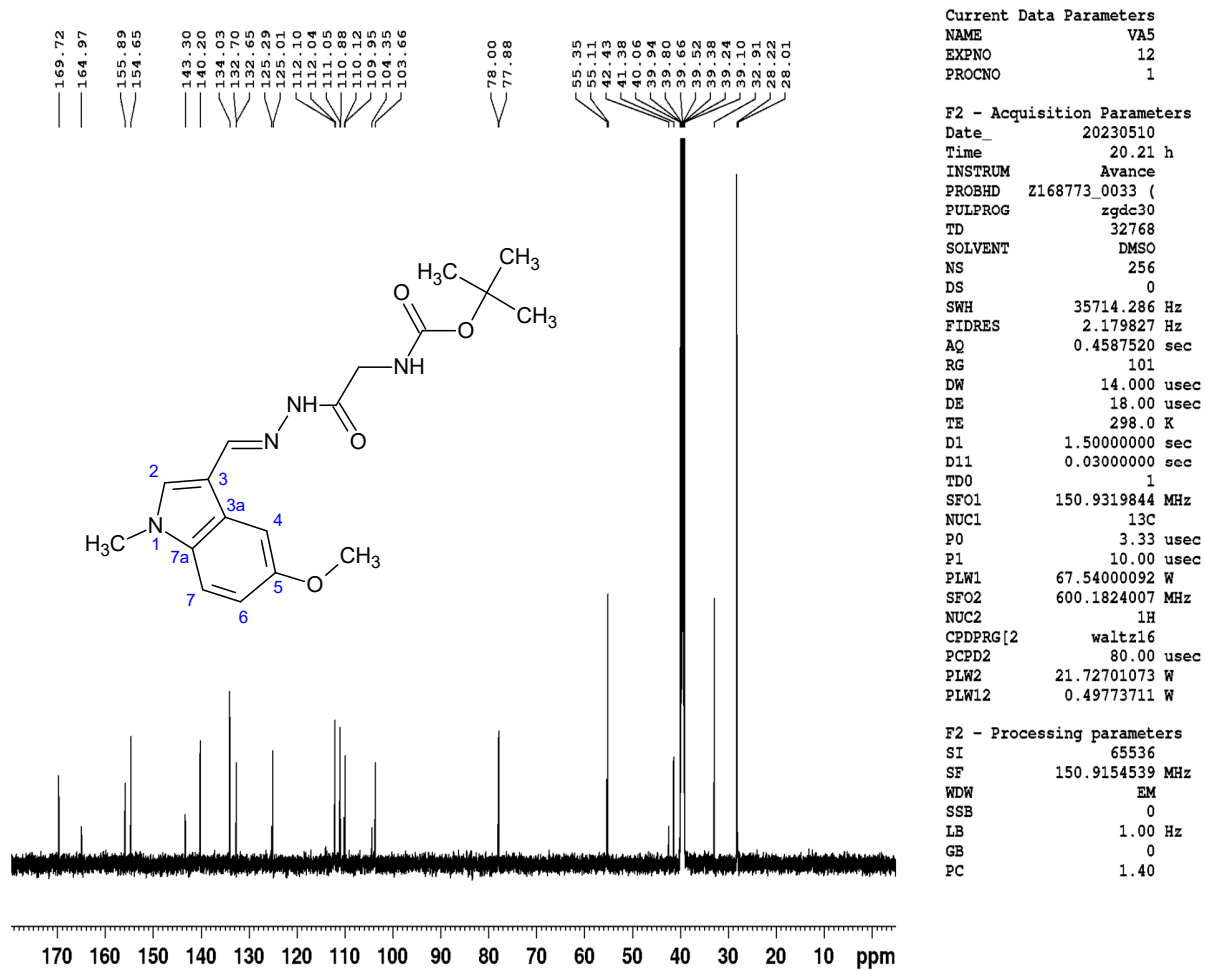

Figure S40.  $^{13}\text{C}$  NMR spectrum of compound 3k in  $\text{DMSO}-d_6$

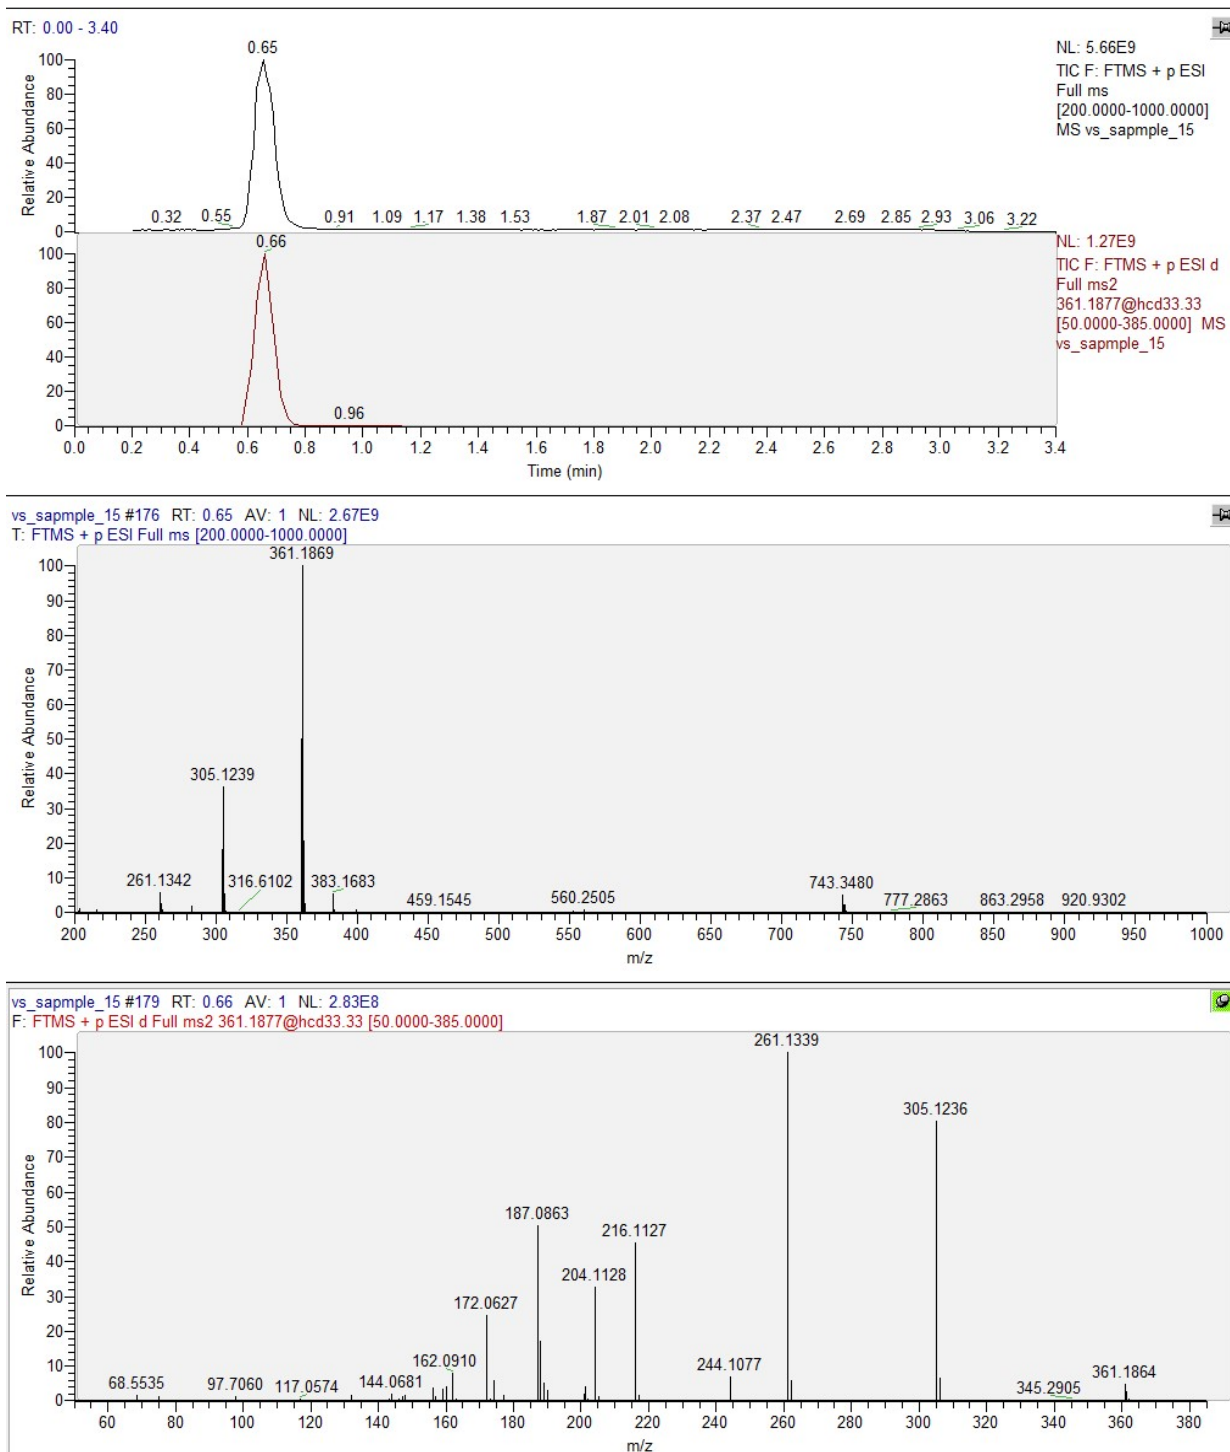

Figure S41. HRMS of compound 3k

**12.. *tert*-butyl (2- $\{$ (2*E*)-2- $\{$ (1-methyl-1*H*-indol-3-yl)methylidene]hydrazinyl}-2-oxoethyl)carbamate, **31****

Yield: 54%; m.p. 178-179°C.  $^1\text{H}$  NMR (600 MHz, DMSO- $d_6$ ): 1:0.40 mixture of conformers; signals for major *synperiplanar* conformer around the amide bond:  $\delta$  = 1.41 (s, 9H, CH<sub>3</sub>), 3.82 (s, 3H, NCH<sub>3</sub>), 4.12 (d,  $J$ =6.1 Hz, 2H, CH<sub>2</sub>), 6.83 (t,  $J$ =6.1 Hz, 1H, NH), 7.22 (ddd,  $J$ =0.7, 7.1, 7.8 Hz, 1H, H-5), 7.28 (ddd,  $J$ =1.2, 7.0, 8.2 Hz, 1H, H-6), 7.51 (d,  $J$ =7.5 Hz, 1H, H-7), 7.77 (s, 1H, C-2), 8.08 (d,  $J$ =7.8 Hz, 1H, H-4), 8.13 (s, 1H, CH), 11.06 (s, 1H, NH); resolved signals for minor *antiperiplanar* conformer around the amide bond: 8.34 (s, 1H, CH), 11.02 (s, 1H, NH).

$^{13}\text{C}$  NMR (151 MHz, DMSO- $d_6$ ): signals for major *synperiplanar* conformer around the amide bond:  $\delta$  = 28.24 (CH<sub>3</sub>), 32.76 (NCH<sub>3</sub>), 41.42 (CH<sub>2</sub>), 77.87 (OC), 110.27 (C-7), 110.38 (C-3), 120.83 (C-5), 121.55 (C-4), 122.66 (C-6), 124.43 (C-3a), 133.90 (C-2), 137.56 (C-7a), 140.22 (CH), 155.96 (OC=O), 169.78 (C=O). HRMS (ESI)  $m/z$ : calcd: [M+H]<sup>+</sup> 331.176467. Found: [M+H]<sup>+</sup> 331.1764

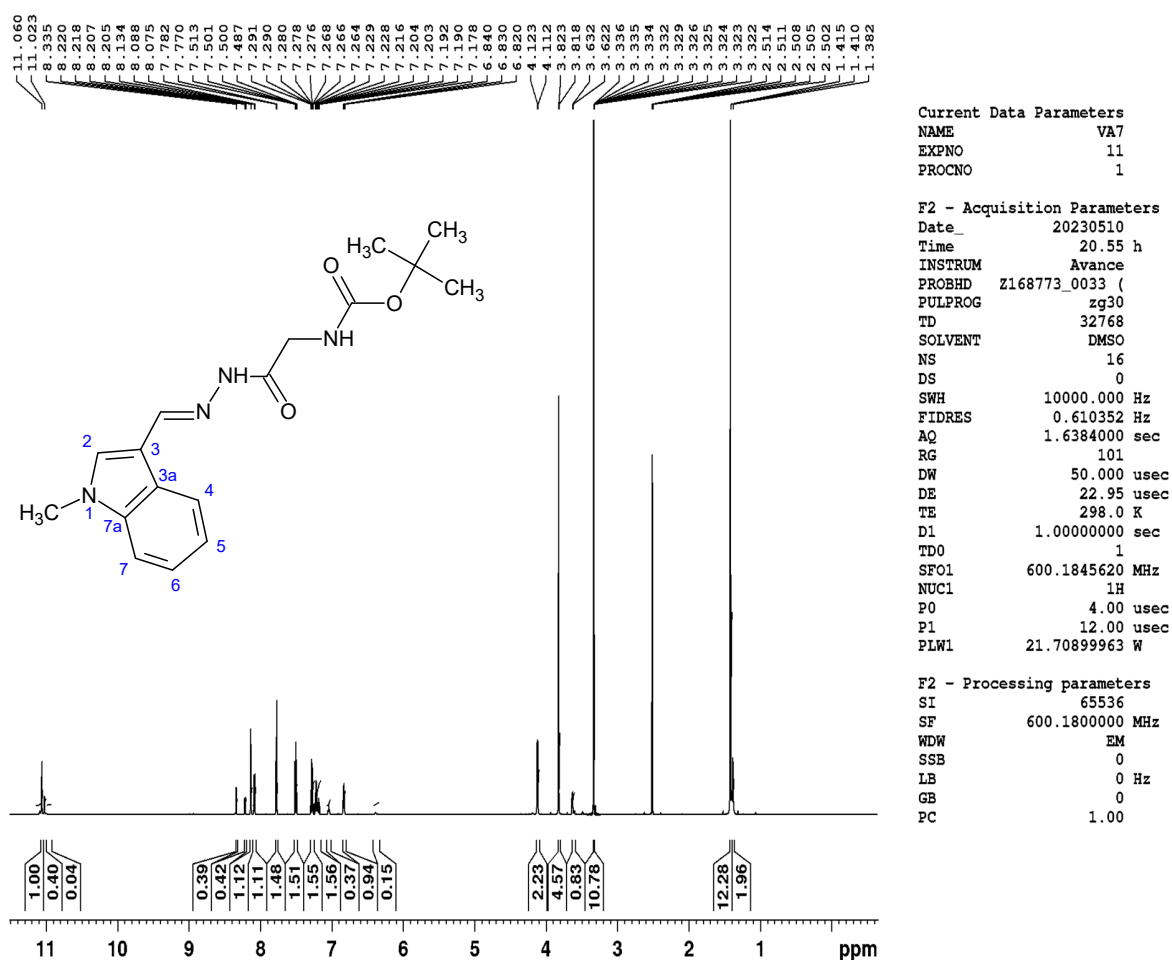

**Figure S42.**  $^1\text{H}$  NMR spectrum of compound **31** in DMSO- $d_6$

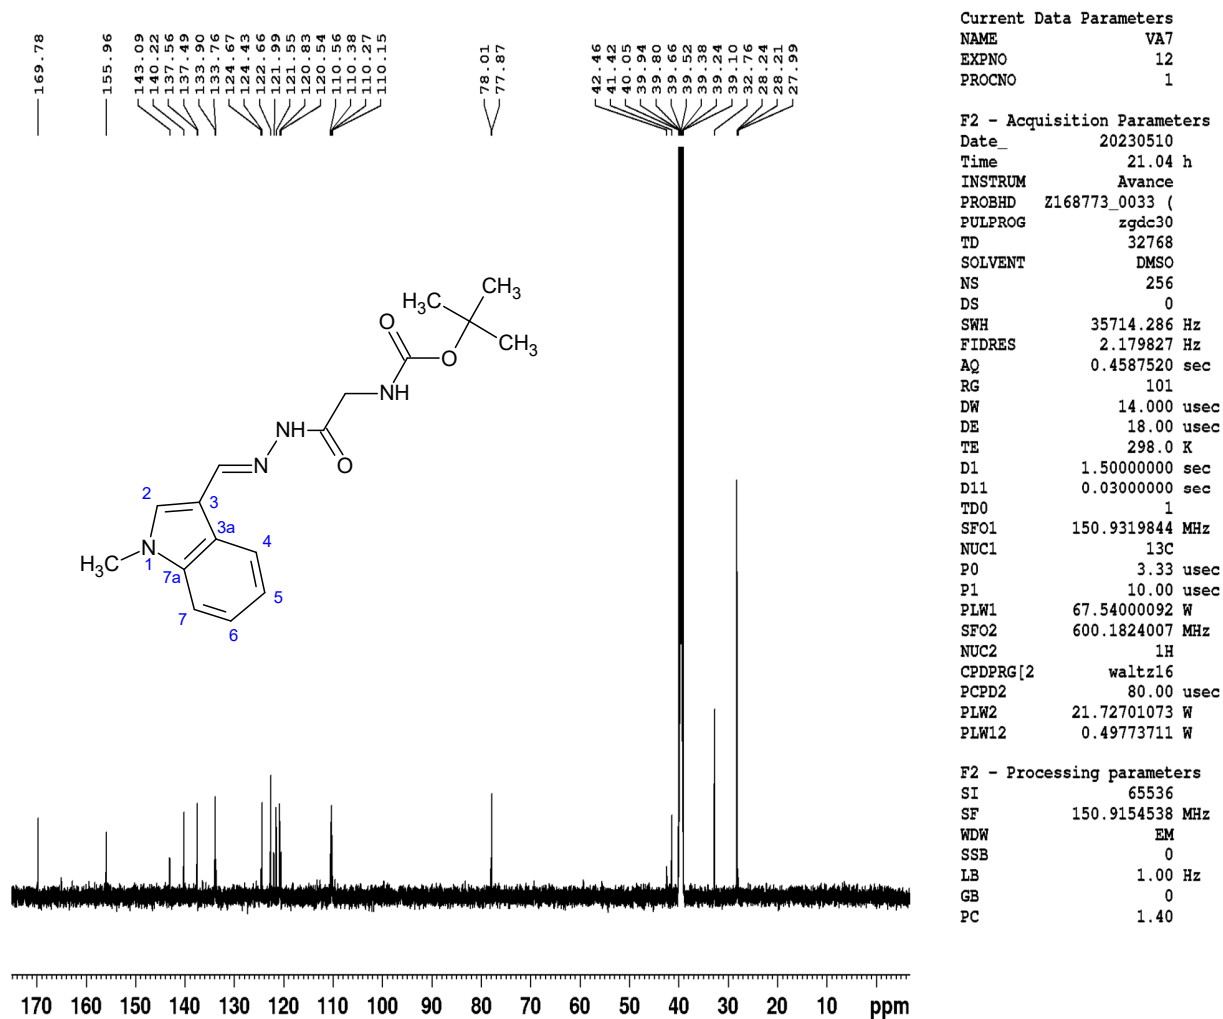

Figure S43. <sup>13</sup>C NMR spectrum of compound **3l** in DMSO-*d*<sub>6</sub>

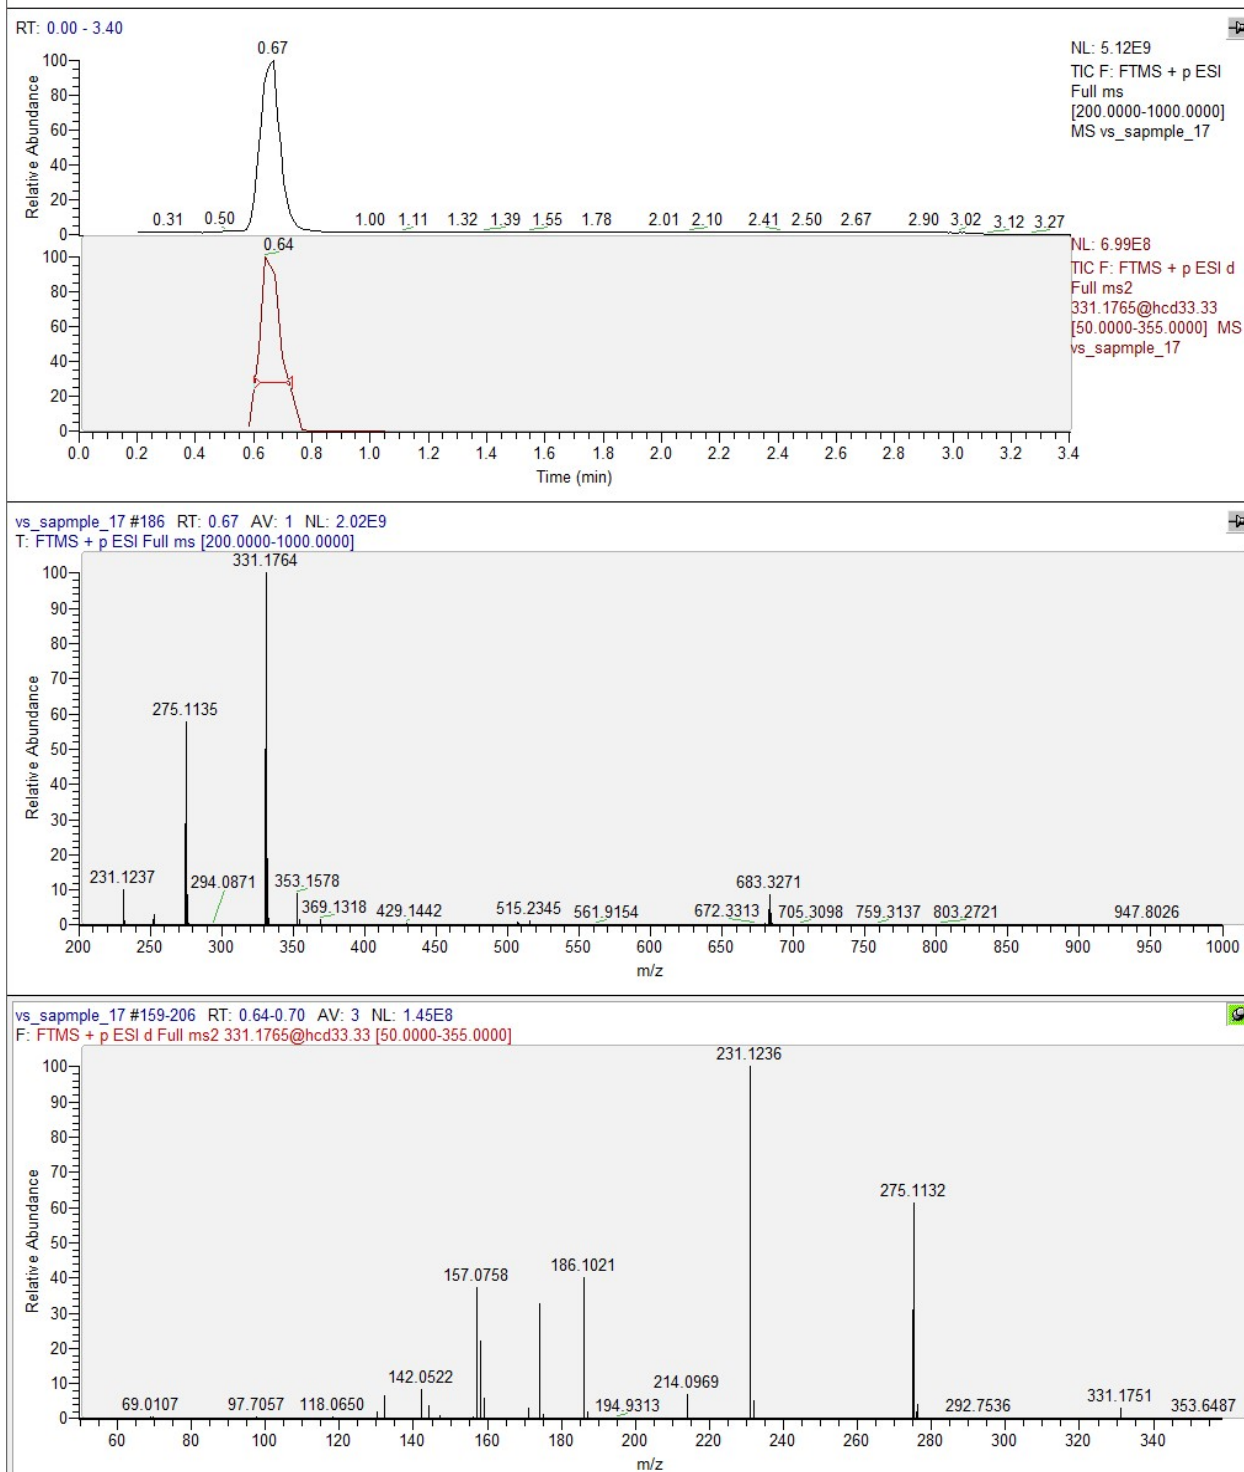

Figure S44. HRMS of compound 31



**13. *tert*-butyl (2-((2*E*)-2-[(1-benzyl-1*H*-indol-3-yl)methylidene]hydrazinyl)-2-oxoethyl)carbamate, **3m****

Yield: 90%; m.p. 207–208 °C. <sup>1</sup>H NMR (600 MHz, DMSO-*d*<sub>6</sub>): 1:0.40 mixture of conformers; signals for major *antiperiplanar* conformer around the amide bond: δ 11.10 (s, 1H, NH), 8.15 (s, 1H, CH), 8.08 (d, *J* = 8.3 Hz, 1H, H-4), 7.95 (s, 1H, H-2), 7.50 (d, *J* = 7.4 Hz, 1H, H-7), 7.30 (d, *J* = 7.5 Hz, 2H, o-Ph), 7.26–7.22 (m, 1H, H-6), 7.21–7.18 (m, 1H, H-5), 7.24 (t, *J* = 8.7 Hz, 2H, m-Ph), 7.20 (t, *J* = 8.0 Hz, 1H, p-Ph), 6.85 (t, *J* = 6.1 Hz, 1H, NH), 5.44 (s, 2H, CH<sub>2</sub>), 4.10 (d, *J* = 6.1 Hz, 2H, CH<sub>2</sub>), 1.40 (s, 9H, CH<sub>3</sub>); resolved signals for minor *antiperiplanar* conformer around the amide bond: 7.05 (t, *J* = 6.0 Hz, 1H, NH), 8.21 (d, *J* = 7.9 Hz, 1H, H-4), 8.34 (s, 1H, CH), 3.62 (d, *J* = 6.1 Hz, 2H, CH<sub>2</sub>).

<sup>13</sup>C NMR (151 MHz, DMSO-*d*<sub>6</sub>): signals for major *antiperiplanar* conformer around the amide bond: δ 170.03 (C=O), 156.16 (O-C=O), 140.39 (CH), 137.68 (i-Ph), 137.02 (C-7a), 133.54 (C-2), 128.79 (C-o), 127.72 (p-Ph), 127.27 (m-Ph), 124.85 (C-3a), 123.03 (C-5), 121.87 (C-4), 121.18 (C-6), 111.15 (C-3), 110.93 (C-7), 78.12 (C), 49.45 (CH<sub>2</sub>), 42.56 (CH<sub>2</sub>), 28.38 (CH<sub>3</sub>); resolved signals for minor *synperiplanar* conformer around the amide bond: 143.22 (CH), 122.29 (C-2), 78.27 (C), 41.57 (CH<sub>2</sub>), 28.35 (CH<sub>3</sub>). HRMS (ESI) *m/z*: calcd: [M+H]<sup>+</sup> 407.207767. Found: [M+H]<sup>+</sup> 407.2078

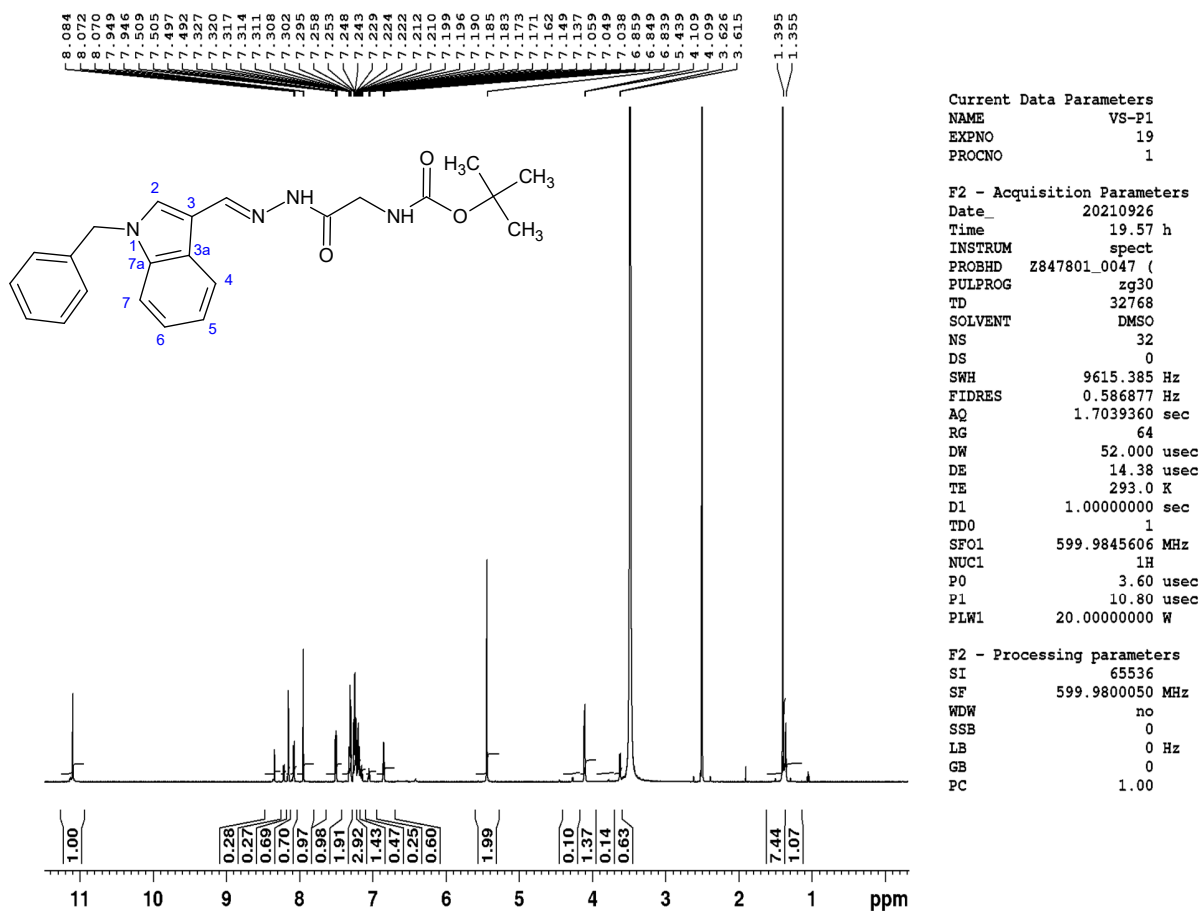

**Figure S45.** <sup>1</sup>H NMR spectrum of compound **3m** in DMSO-*d*<sub>6</sub>

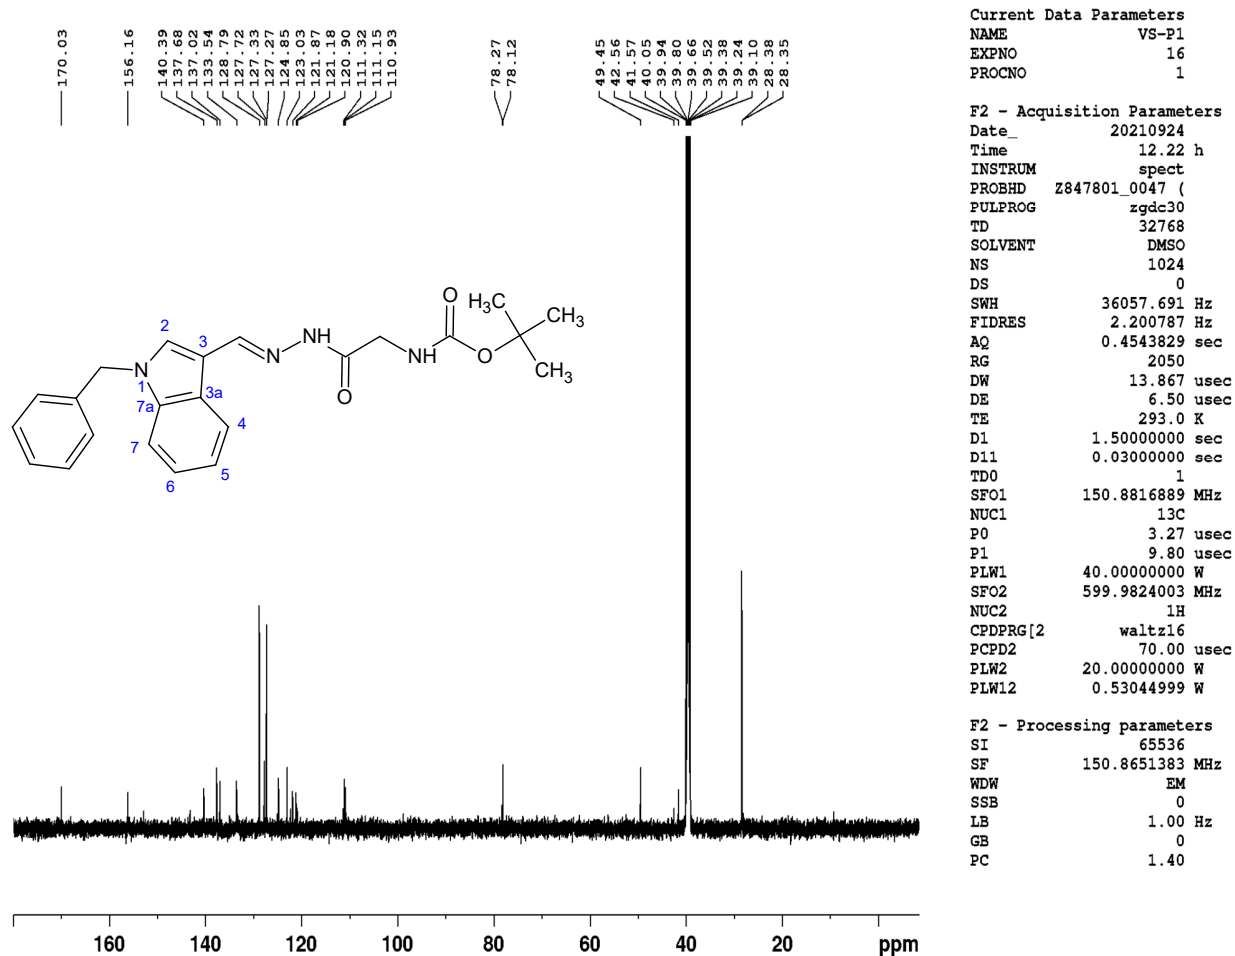

Figure S46. <sup>13</sup>C NMR spectrum of compound **3m** in DMSO-*d*<sub>6</sub>

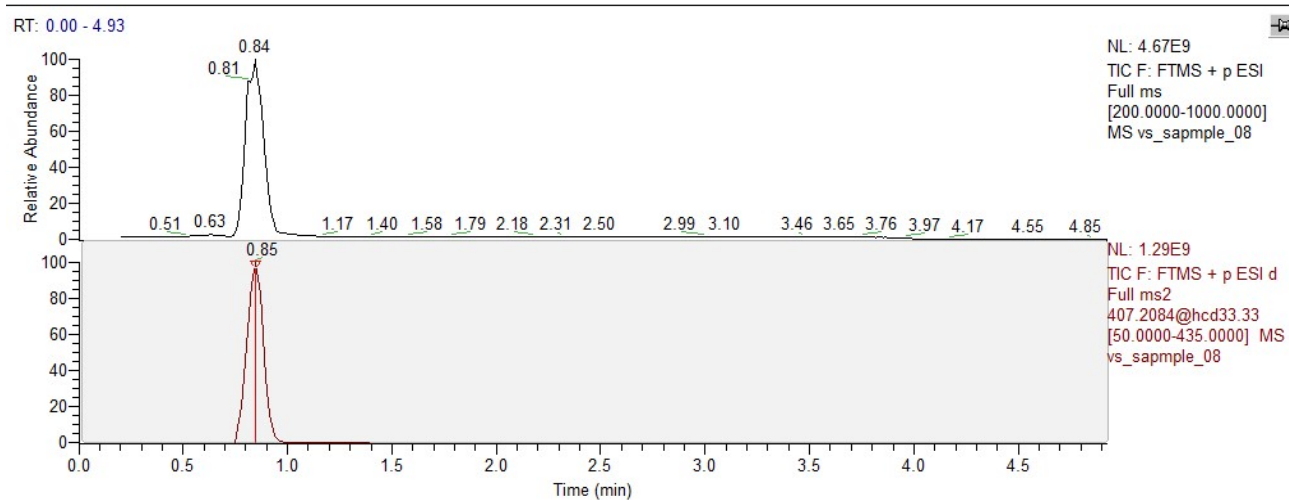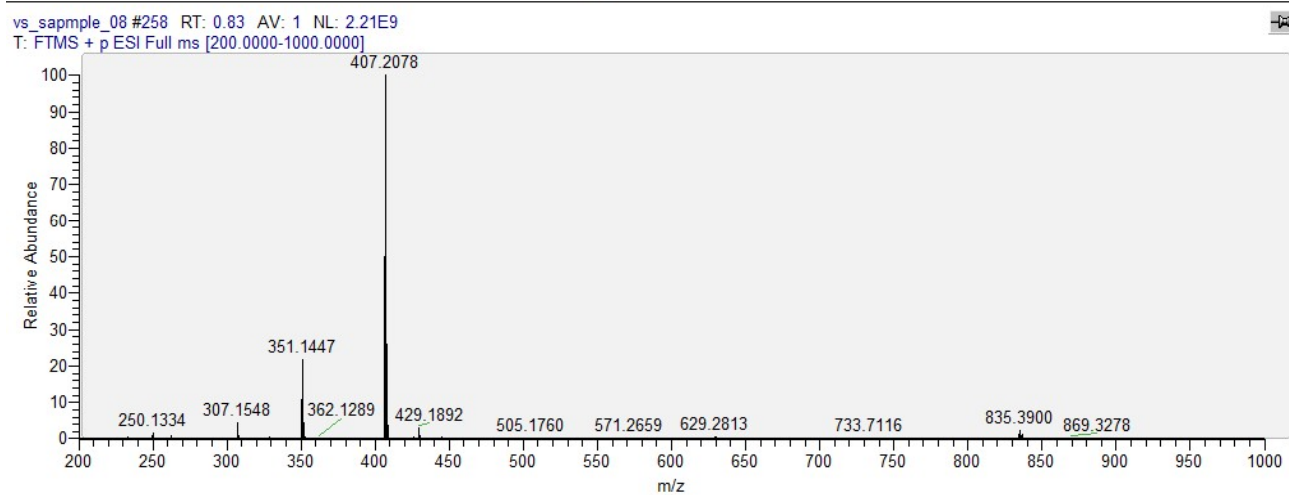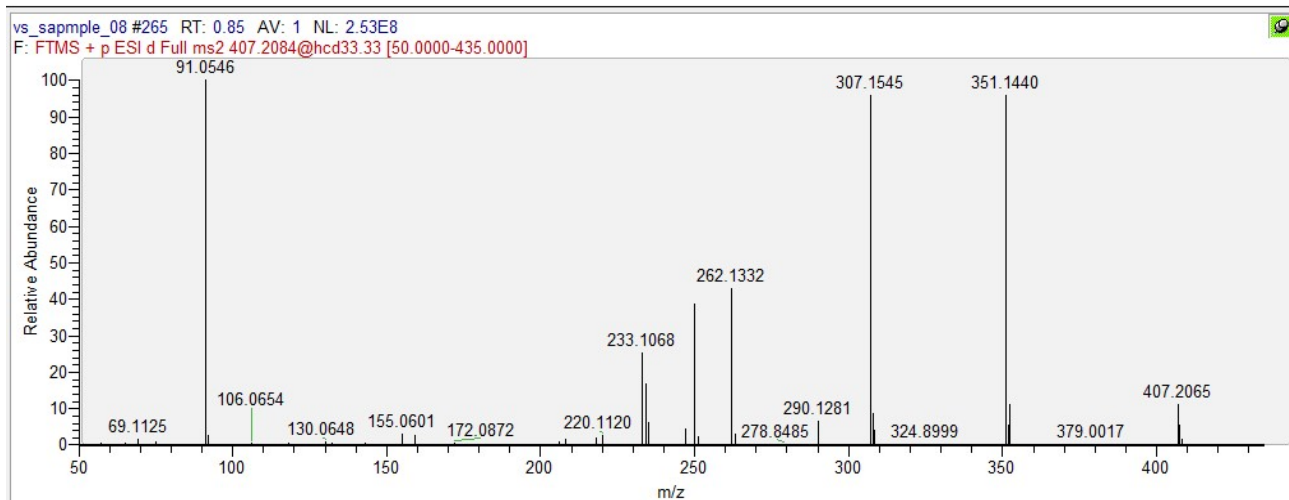

Figure S47. HRMS of compound 3m

#### 14. 2-(1*H*-indol-3-yl)-*N'*-[(*E*)-(5-methoxy-1*H*-indol-3-yl)methylidene]acetohydrazide, **3n** [1]

<sup>1</sup>H NMR, <sup>13</sup>C NMR and HRMS spectra of compound **3n** can be found in <https://doi.org/10.1016/j.bmcl.2021.128516>

#### 15. *N'*-[(*E*)-(3,4-dimethoxyphenyl)methylidene]-1*H*-indole-3-carbohydrazide, **3o**

Yield: 78%; m.p. 267-270°C. <sup>1</sup>H NMR (400 MHz, DMSO-d<sub>6</sub>, 353K): δ = 3.83 (s, 3H, OCH<sub>3</sub>), 3.84 (s, 3H, OCH<sub>3</sub>), 7.03 (d, J=8.3 Hz, 1H, H-5'), 7.14 (ddd, J=1.3, 7.0, 7.7 Hz, 1H, H-5), 7.18 (dt, J=1.6, 6.6 Hz, 1H, H-6), 7.20 (dd, J=1.6, 7.2 Hz, 1H, H-6'), 7.35 (d, J=1.9 Hz, 1H, H-2'), 7.48 (d, J=8.0 Hz, 1H, H-7), 8.21 (d, J=7.6 Hz, 1H, H-4), 8.26 (s, 1H, CH), 10.98 (bs, 1H, NH), 11.52 (bs, 1H, NH). <sup>13</sup>C NMR (151 MHz, DMSO-d<sub>6</sub>, 353K): δ = 55.48 (CH<sub>3</sub>), 55.56 (CH<sub>3</sub>), 108.45 (C-3), 109.14 (C-2'), 111.45 (C-5'), 112.05 (C-7), 120.22 (C-4), 120.74 (C-5), 120.89 (C-6'), 121.73 (C-6), 126.53 (C-1'), 127.66 (C-3a), 129.17 (C-2), 135.69 (C-7a), 144.03 (CH), 149.15 (C-3'), 150.35 (C-4'), 162.13 (C=O). HRMS (ESI) *m/z*: calcd: [M+H]<sup>+</sup> 324.134268. Found: [M+H]<sup>+</sup> 324.13358

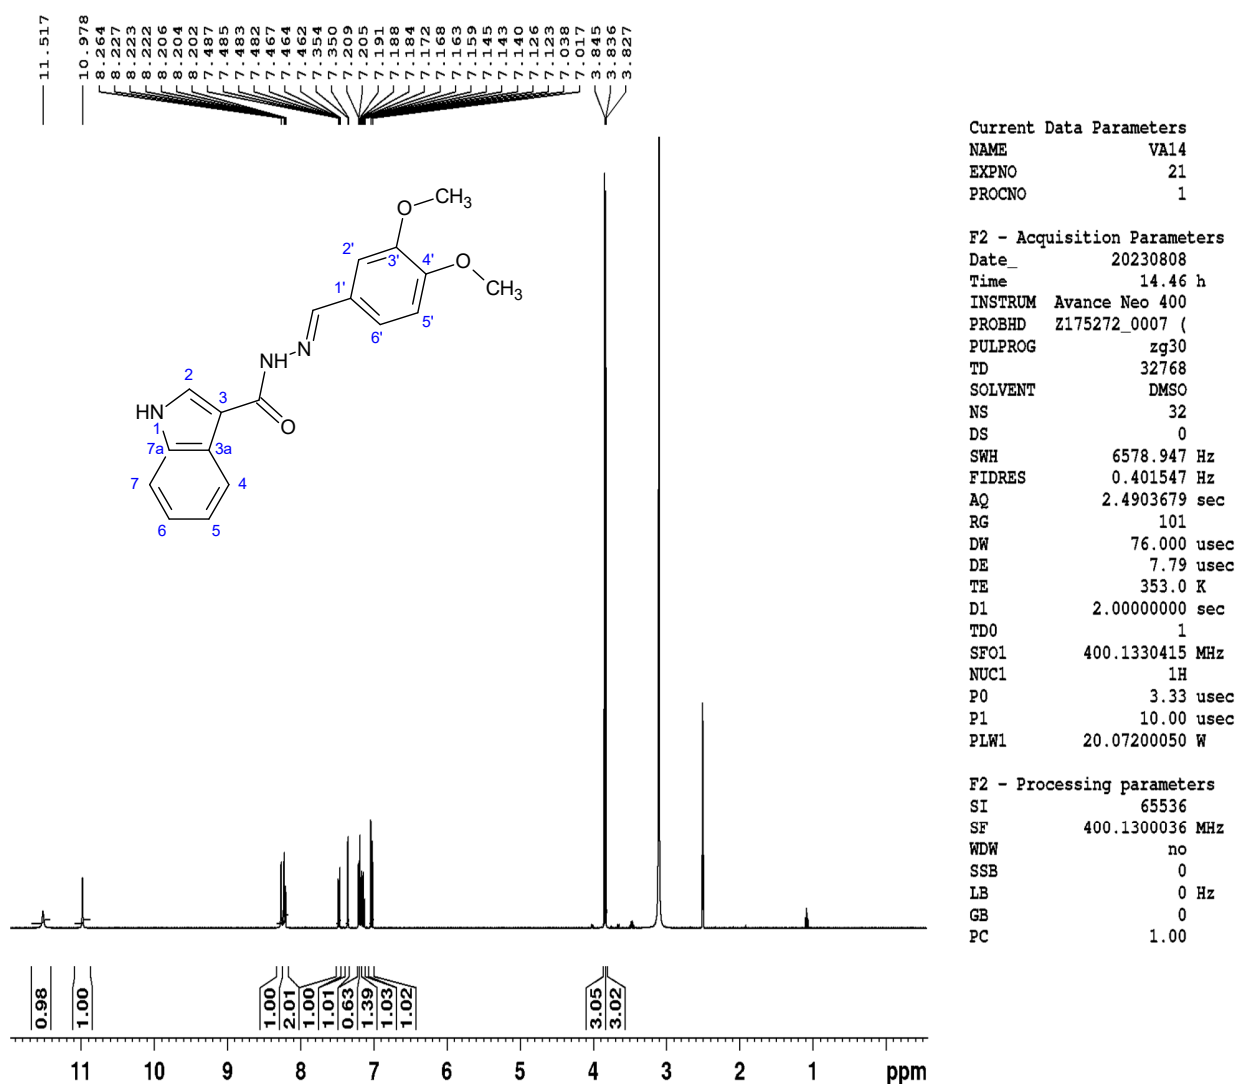

Figure S48.  $^1\text{H}$  NMR spectrum of compound **3o** in  $\text{DMSO}-d_6$

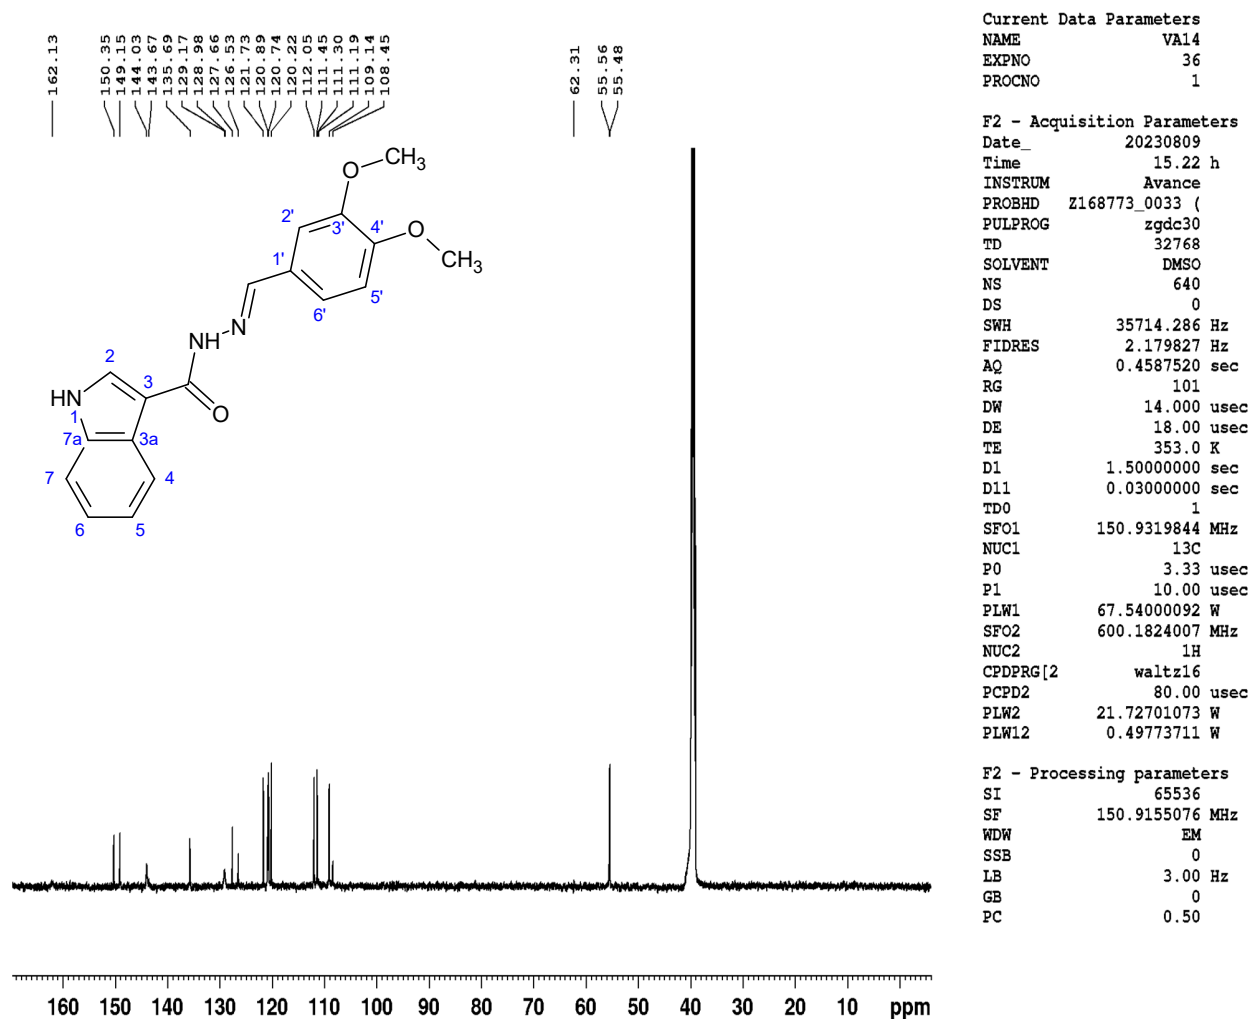

Figure S49.  $^{13}\text{C}$  NMR spectrum of compound **3o** in  $\text{DMSO}-d_6$

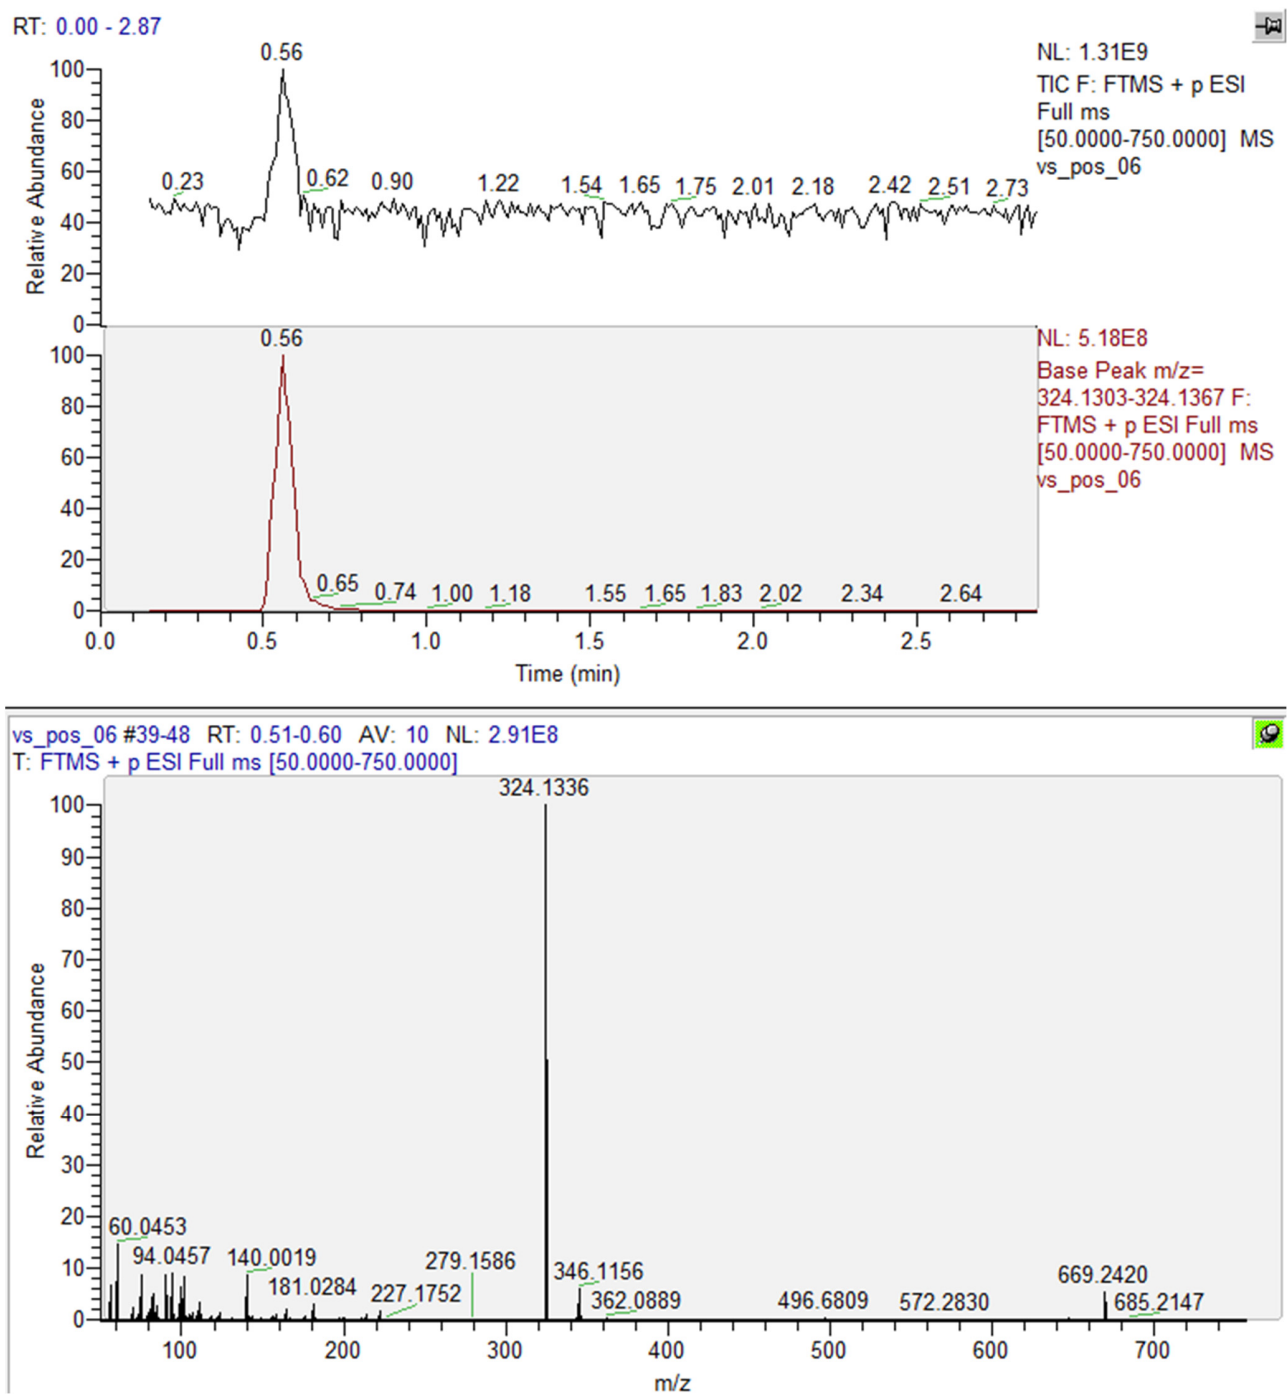

**Figure S50.** HRMS of compound **3o**

**16. *N'*-(*E*)-(3,4-dimethoxyphenyl)methylidene]-2-(1*H*-indol-3-yl)acetohydrazide, 3p**

Yield: 92%; m.p. 177-180°C. <sup>1</sup>H NMR (600 MHz, DMSO-*d*<sub>6</sub>): 1:0.80 mixture of conformers; signals for major *antiperiplanar* conformer around the amide bond: δ = 3.80 (s, 3H, OCH<sub>3</sub>), 3.81 (s, 3H, OCH<sub>3</sub>), 4.05 (s, 2H, CH<sub>2</sub>), 6.95 (t, *J*=7.5 Hz, 1H, H-5), 7.01 (d, 8.5 Hz, 2H, H-5'), 7.06 (t, *J*=7.0 Hz, 1H, H-6), 7.17 (dt, *J*=1.8, 8.7 Hz, 2H, H-6'), 7.28 (d, *J*=1.7 Hz, 1H, H-2'), 7.35 (d, *J*=2.42 Hz, 1H, H-2), 7.36 (d, *J*=9.27 Hz, 1H, H-7), 7.60 (dd, *J*=3.46, 7.85 Hz, 1H, H-4), 7.91 (s, 1H, CH), 10.87 (bs, 1H, NH), 11.18 (s, 1H, NH); resolved signals for minor *antiperiplanar* conformer around the amide bond: 8.15 (s, 1H, CH), 10.91 (bs, 1H, NH), 11.40 (s, 1H, NH)

<sup>13</sup>C NMR (151 MHz, DMSO-*d*<sub>6</sub>): signals for major *antiperiplanar* conformer around the amide bond: δ = 29.24 (CH<sub>2</sub>), 55.40 (OCH<sub>3</sub>), 108.22 (C-2'), 108.25 (C-3), 111.30 (C-5'), 111.56 (C-7), 118.28 (C-4), 118.66 (C-5), 120.97 (C-6'), 121.59 (C-6), 123.86 (C-2), 127.13 (C-1'), 127.39 (C-3a), 135.98 (C-7a), 142.46 (CH), 148.99 (C-3'), 150.56 (C-4'), 172.52 (C=O). HRMS (ESI) *m/z*: calcd: [M+H]<sup>+</sup> 338.149918. Found: [M+H]<sup>+</sup> 338.14902

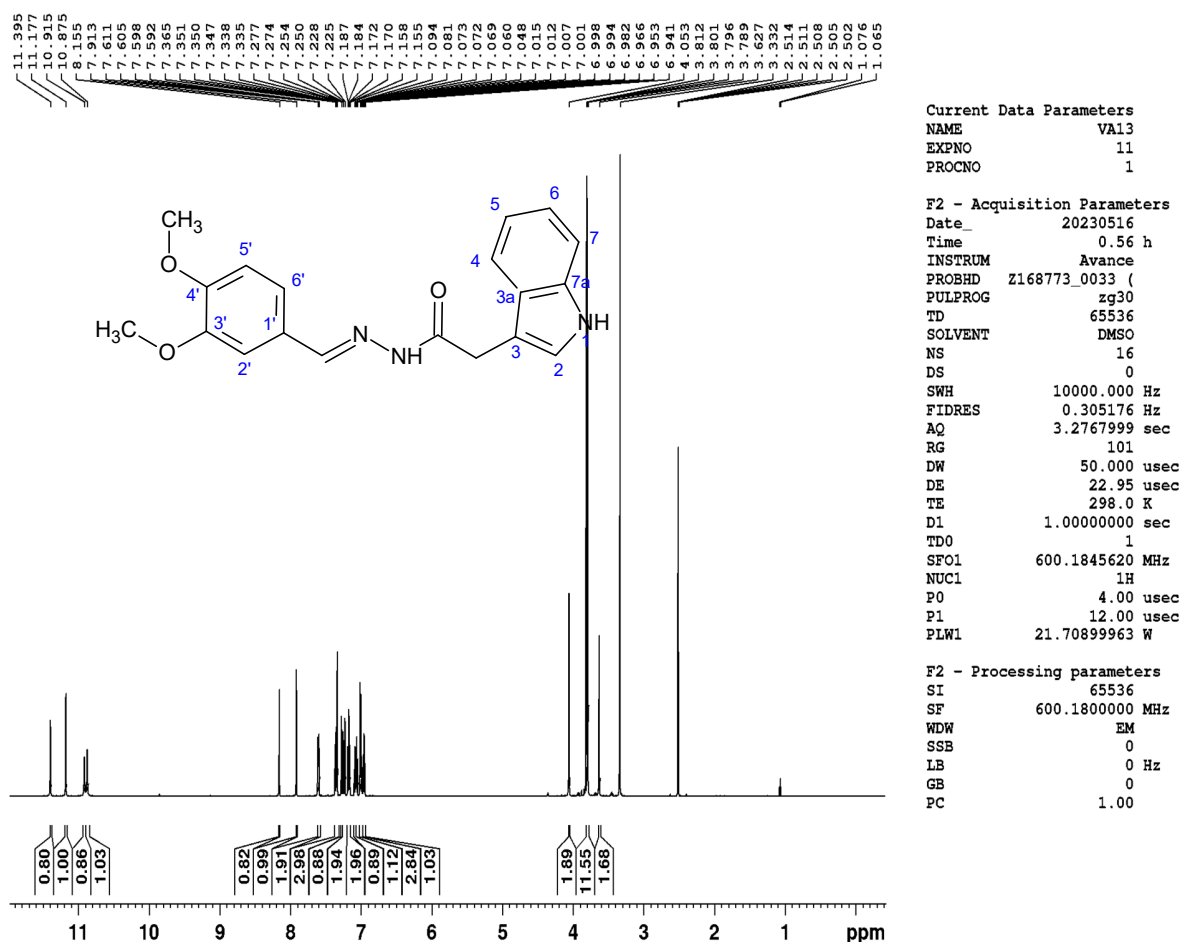

**Figure S51.** <sup>1</sup>H NMR spectrum of compound **3p** in DMSO-*d*<sub>6</sub>

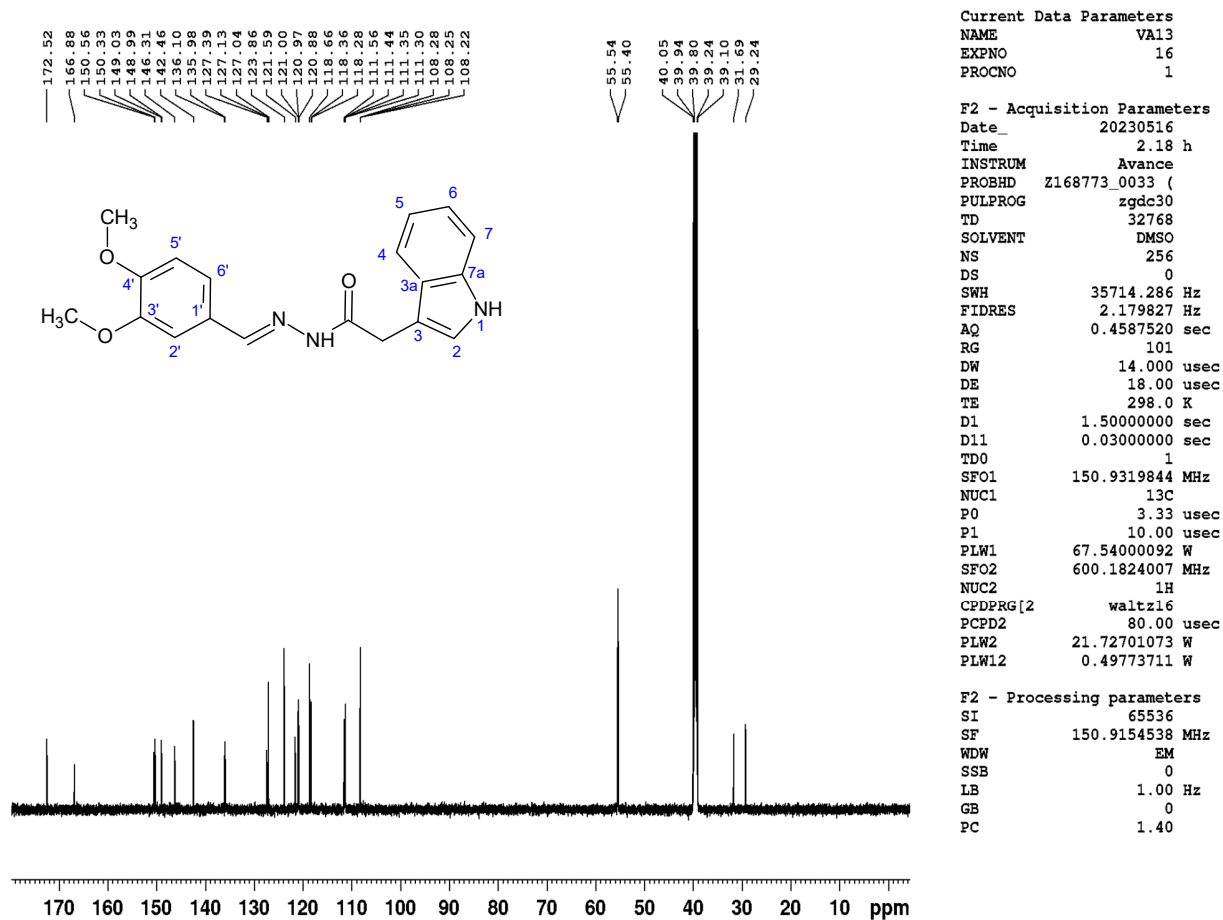

**Figure S52.** <sup>13</sup>C NMR spectrum of compound **3p** in DMSO-*d*<sub>6</sub>



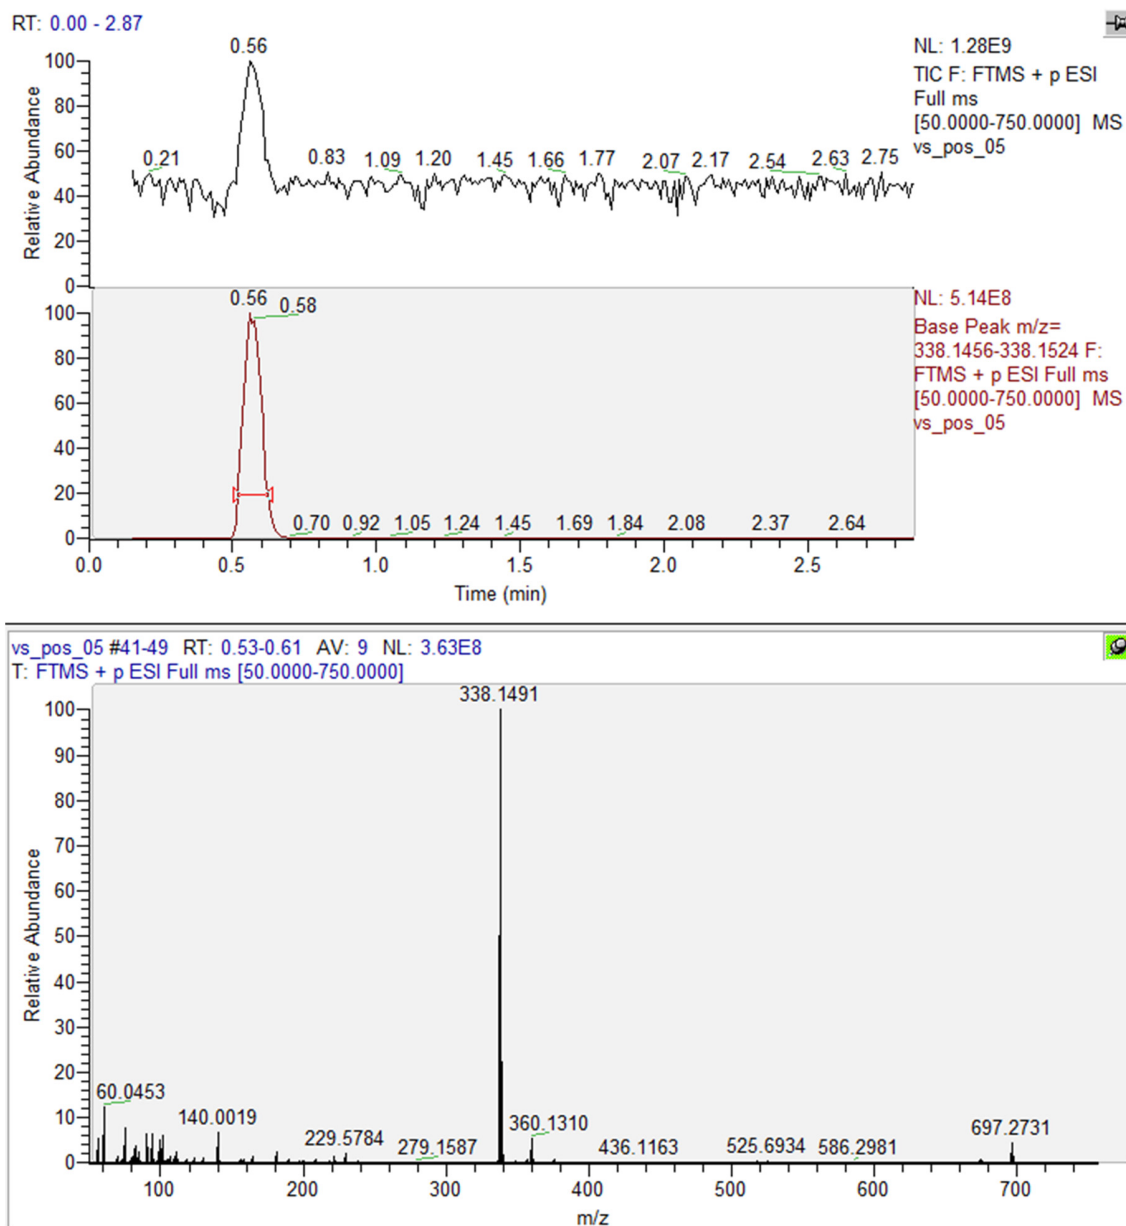

**Figure S53.** HRMS of compound **3p**

**17. *N'*-[*(E)*-(4-hydroxy-3-methoxyphenyl)methylidene]-2-(1*H*-indol-3-yl)acetohydrazide, **3q****

Yield: 72%; m.p. 246-247°C. <sup>1</sup>H-NMR (400 MHz, DMSO-*d*<sub>6</sub>): 0.54 : 0.46 mixture of two conformers; signals for major conformer: δ = 3.81 (s, 3H, CH<sub>3</sub>), 4.04 (s, 2H, CH<sub>2</sub>), 6.82 (d, *J*=8.1 Hz, 1H, H-5'), 6.96-7.00 (m, 1H, H-5), 7.02-7.09 (m, 2H, H-6 and H-6'), 7.22 (d, *J*=2.3 Hz, 1H, H-2), 7.29 (d, *J*=1.8 Hz, 1H, H-2'), 7.33 (d, *J*=6.8 Hz, 1H, H-7), 7.59 (d, *J*=7.9 Hz, 1H, H-4), 7.87 (s, 1H, CH), 9.46 (s, 1H, OH), 10.86 (s, 1H, NH), 11.10 (s, 1H, NH); Signals for minor conformer: δ(ppm): 3.61 (s, 2H, CH<sub>2</sub>), 3.79 (s, 3H, CH<sub>3</sub>), 6.81 (d, *J*=8.1 Hz, 1H, H-5'), 6.93-6.97 (m, 1H, H-5), 7.02-7.09 (m, 2H, H-6 and H-6'), 7.24 (d, *J*=1.9 Hz, 2H, H-2 and H-2'), 7.35 (d, *J*=7.0 Hz, 1H, H-7), 7.59 (d, *J*=7.9 Hz, 1H, H-4), 8.11 (s, 1H, CH), 9.48 (s, 1H, OH), 10.90 (s, 1H, NH), 11.33 (s, 1H, NH).

$^{13}\text{C}$ -NMR (151 MHz,  $\text{DMSO-d}_6$ ): 0.54 : 0.46 mixture of two conformers; signals for major conformer:  $\delta$  = 29.20 ( $\text{CH}_2$ ), 55.51 ( $\text{CH}_3$ ), 108.33 ( $\text{C-3}$ ), 109.10 ( $\text{C-2'}$ ), 111.30 ( $\text{C-7}$ ), 115.37 ( $\text{C-5'}$ ), 118.27 ( $\text{C-5}$ ), 118.68 ( $\text{C-4}$ ), 120.88 ( $\text{C-6'}$ ), 121.11 ( $\text{C-6}$ ), 123.86 ( $\text{C-2}$ ), 125.82 ( $\text{C-1'}$ ), 127.42 ( $\text{C-4a}$ ), 135.98 ( $\text{C-7a}$ ), 142.81 ( $\text{CH}$ ), 147.97 ( $\text{C-3'}$ ), 148.51 ( $\text{C-4'}$ ), 172.43 ( $\text{C=O}$ ); Signals for minor conformer:  $\delta(\text{ppm})$ : 31.69 ( $\text{CH}_2$ ), 55.51 ( $\text{CH}_3$ ), 108.31 ( $\text{C-3}$ ), 108.93 ( $\text{C-2'}$ ), 111.35 ( $\text{C-7}$ ), 115.52 ( $\text{C-5'}$ ), 118.36 ( $\text{C-5}$ ), 118.68 ( $\text{C-4}$ ), 121.00 ( $\text{C-6'}$ ), 121.87 ( $\text{C-6}$ ), 123.86 ( $\text{C-2}$ ), 125.73 ( $\text{C-1'}$ ), 127.14 ( $\text{C-4a}$ ), 136.10 ( $\text{C-7a}$ ), 146.65 ( $\text{CH}$ ), 147.97 ( $\text{C-3'}$ ), 148.78 ( $\text{C-4'}$ ), 166.79 ( $\text{C=O}$ ). HRMS (ESI)  $m/z$ : calcd:  $[\text{M}+\text{H}]^+$  324.134268. Found:  $[\text{M}+\text{H}]^+$  324.1341

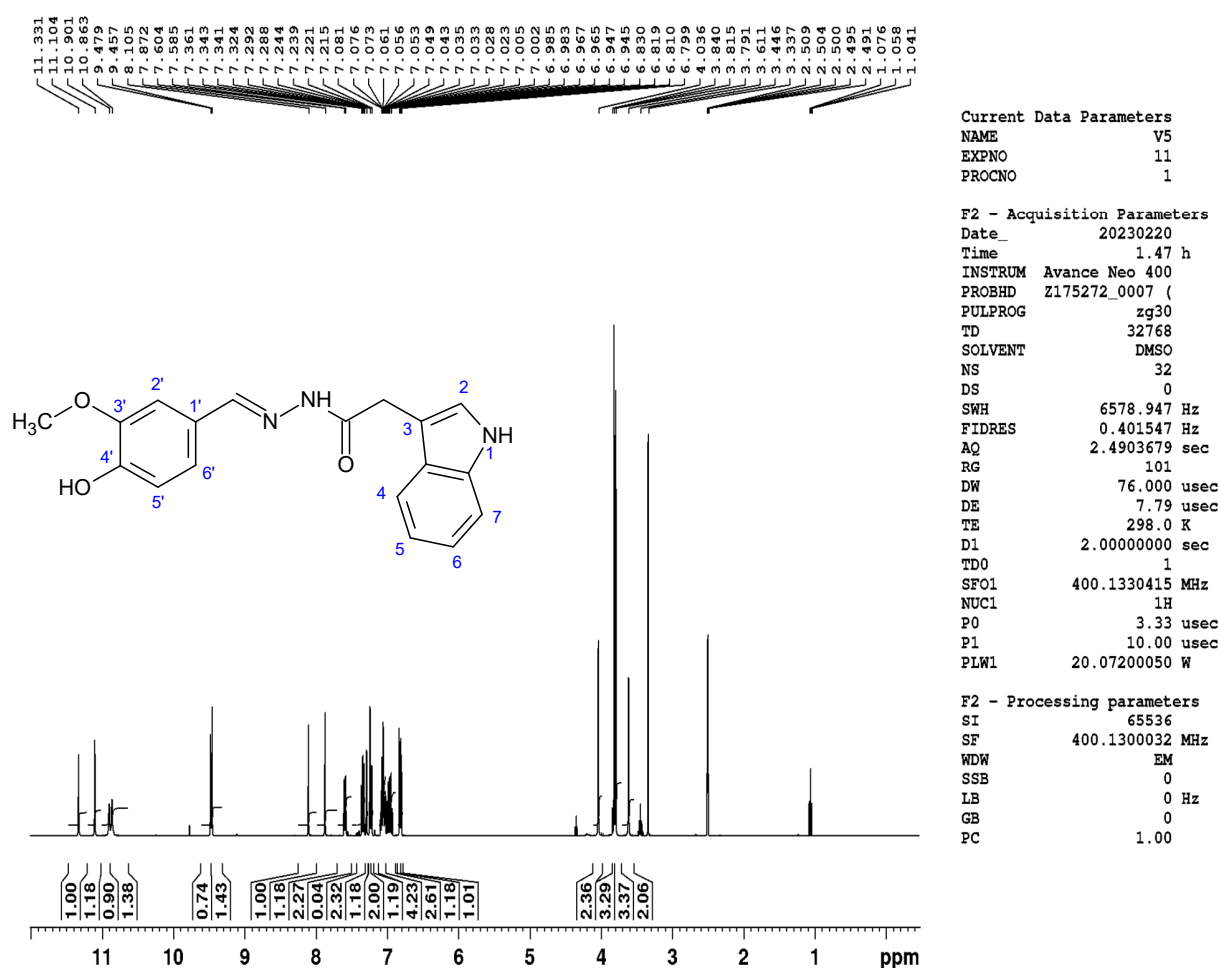

Figure S54.  $^1\text{H}$  NMR spectrum of compound **3q** in  $\text{DMSO-d}_6$

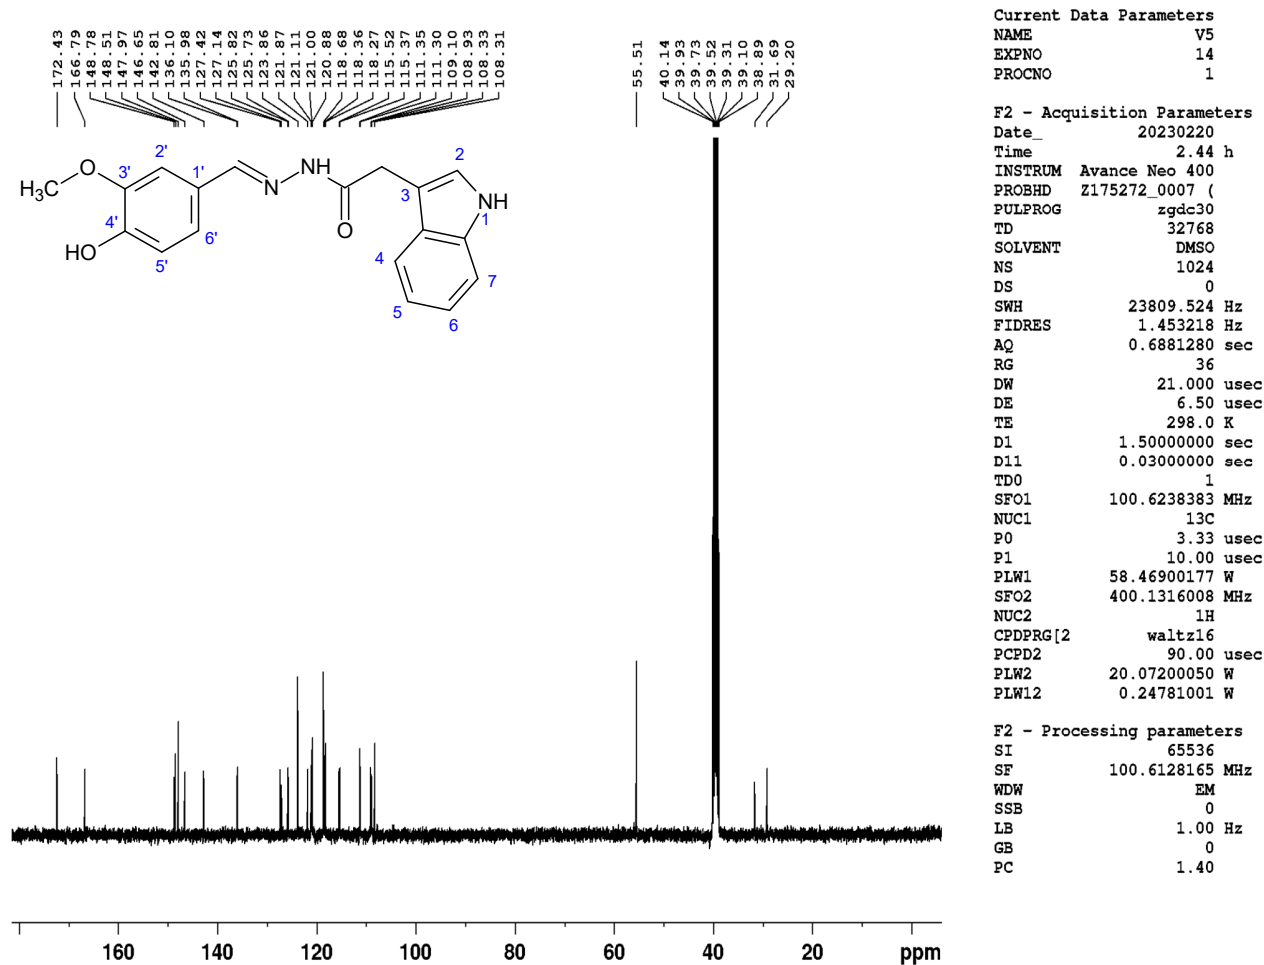

**Figure S55.**  $^{13}\text{C}$  NMR spectrum of compound **3q** in  $\text{DMSO-}d_6$

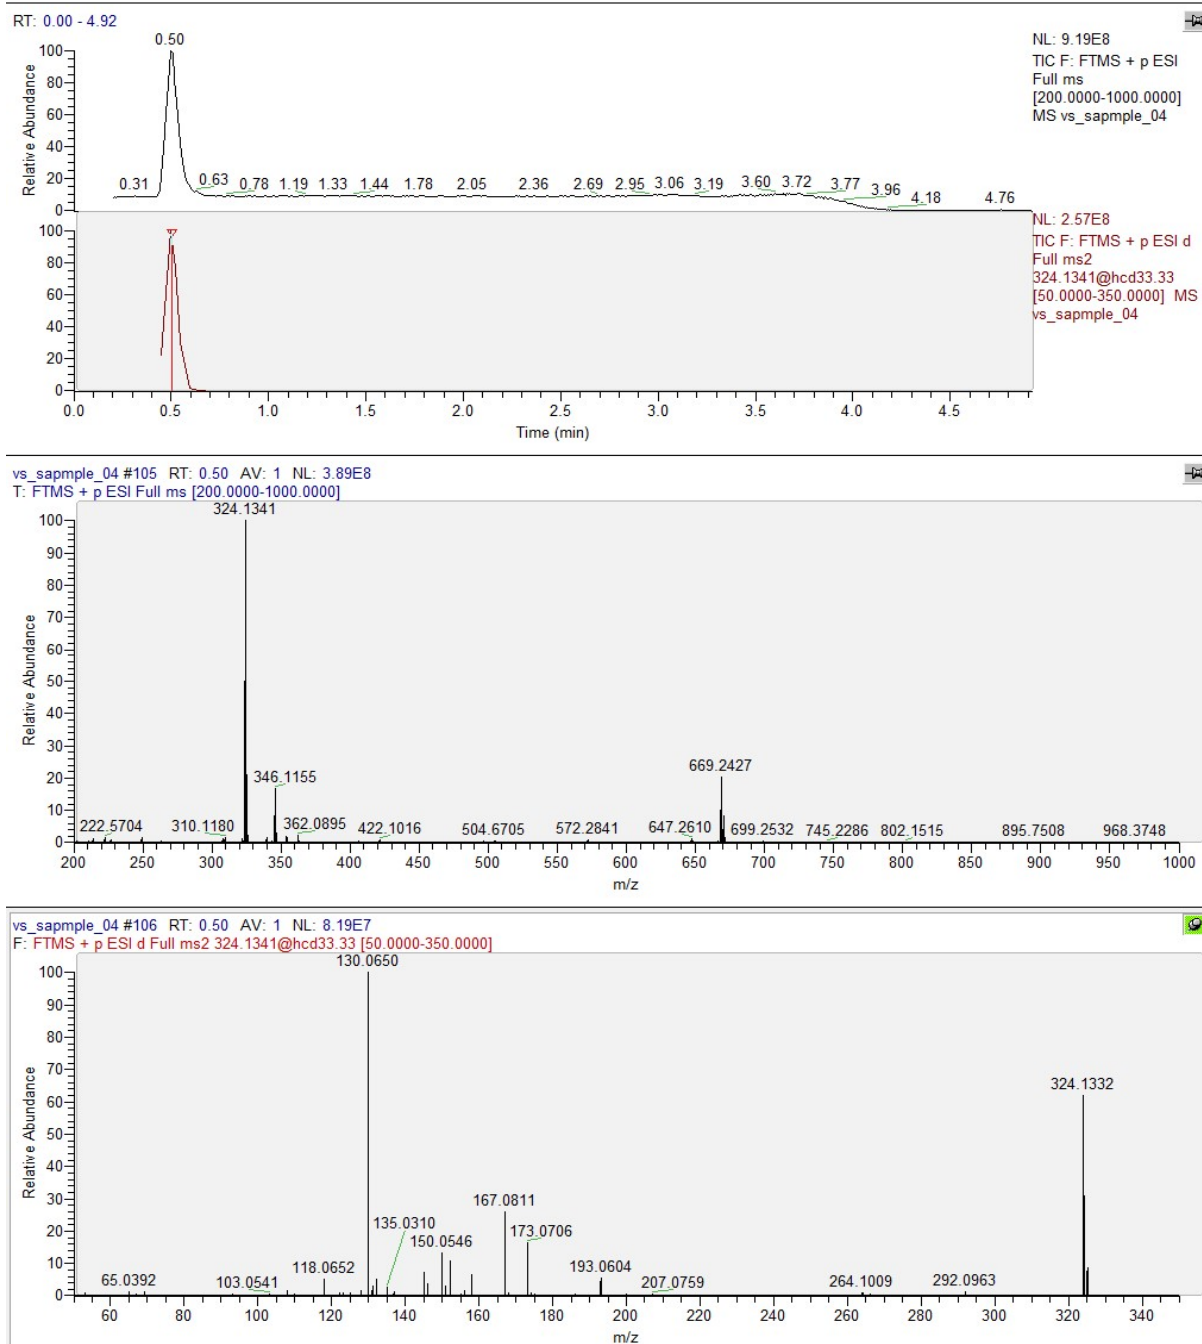

Figure S56. HRMS of compound 3q

**18. 2,4-dihydroxy-*N'*-[(*E*)-(4-hydroxy-3-methoxyphenyl)methylidene]benzohydrazide, 3r**

Yield: 76%; m.p. 242-243°C. <sup>1</sup>H NMR (400 MHz, DMSO-*d*<sub>6</sub>): 3.36 (s, 3H, CH<sub>3</sub>), 6.31 (d, *J*=2.4 Hz, 1H, H-3), 6.37 (dd, *J*=2.4, 8.7 Hz, 1H, H-5), 6.85 (d, *J*=8.1 Hz, 1H, H-6'), 7.10 (dd, *J*=1.8, 8.1 Hz, 1H, H-5'), 7.32 (d, *J*=1.8 Hz, 1H, H-2'), 7.80 (d, *J*=8.7 Hz, 1H, H-6), 8.33 (s, 1H, CH), 9.56 (s, 1H, OH), 10.19 (s, 1H, OH), 11.54 (s, 1H, NH), 12.45 (s, 1H, OH).

<sup>13</sup>C NMR (100 MHz, DMSO-*d*<sub>6</sub>): 55.55 (CH<sub>3</sub>), 102.86 (C-3), 106.20 (C-1), 107.33 (C-5), 108.99 (C-2'), 115.45 (C-6'), 122.27 (C-5'), 125.59 (C-1'), 129.49 (C-6), 148.05 (C-4'), 148.61 (CH), 149.09 (C-3'), 162.31 (C-4), 162.57 (C-2), 165.28 (C=O).

HRMS (ESI) *m/z*: calcd: [M+H]<sup>+</sup> 303.097548. Found: [M+H]<sup>+</sup> 303.0974

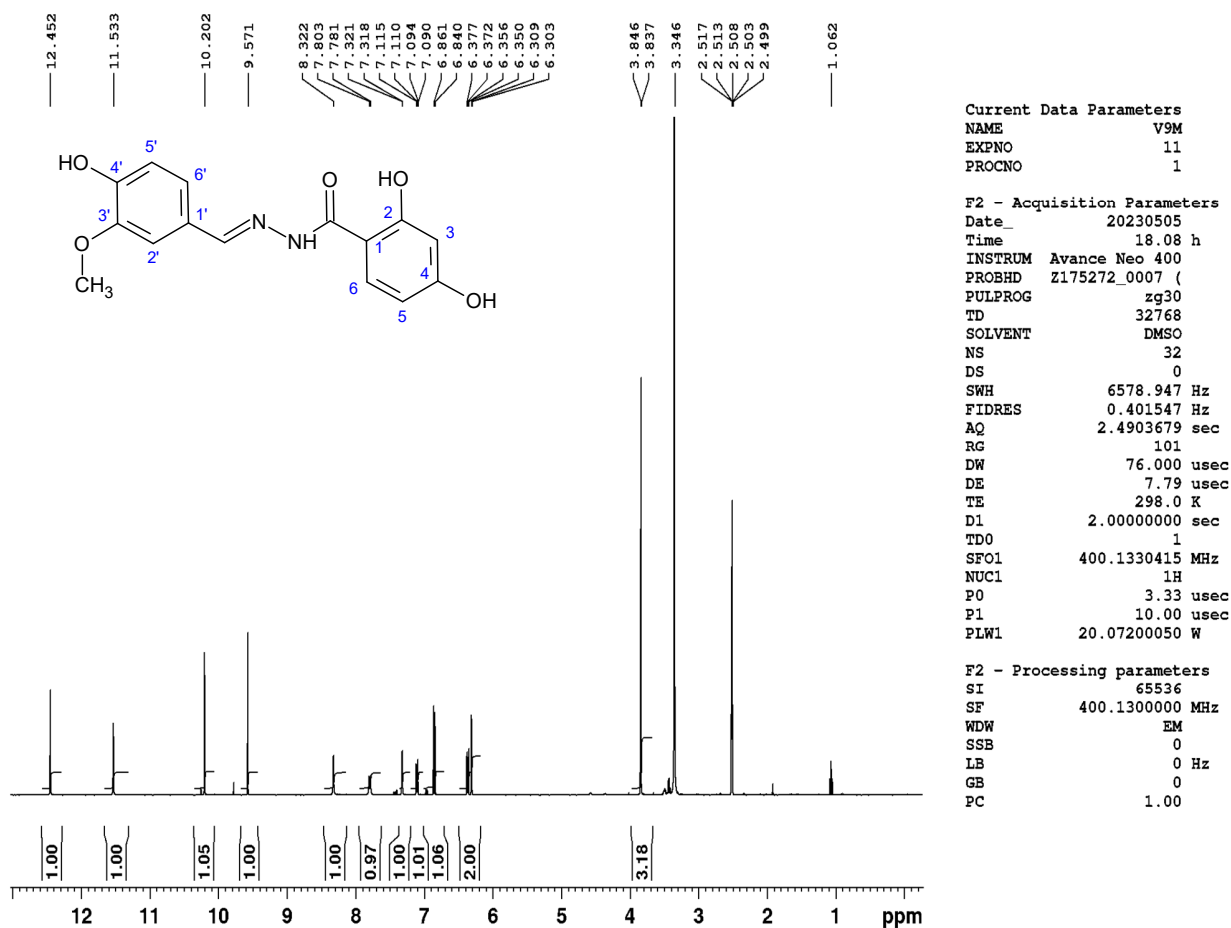

**Figure S57.** <sup>1</sup>H NMR spectrum of compound **3r** in DMSO-*d*<sub>6</sub>

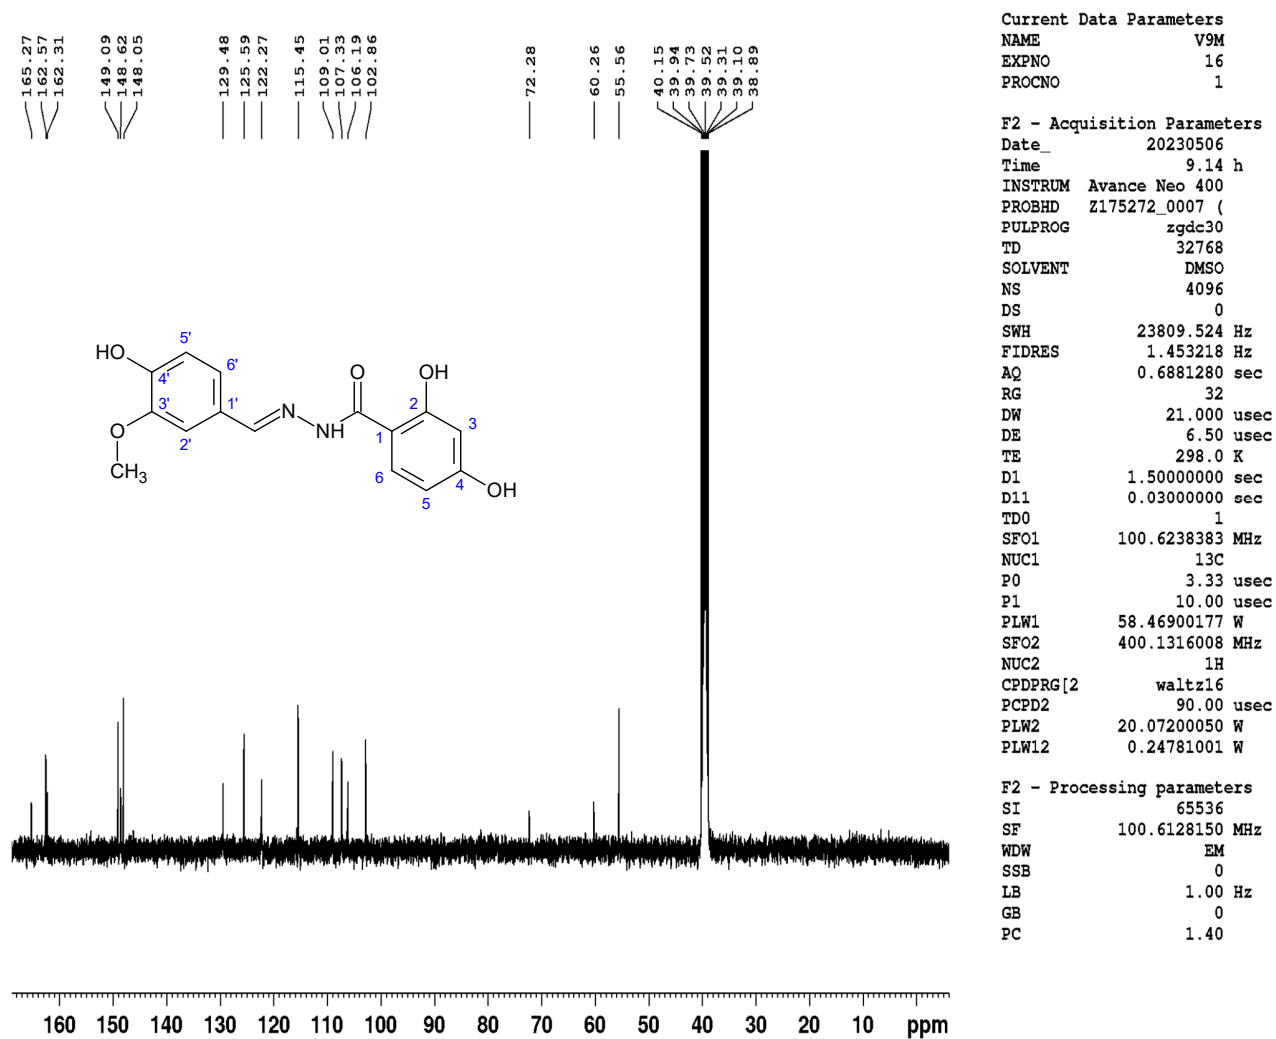

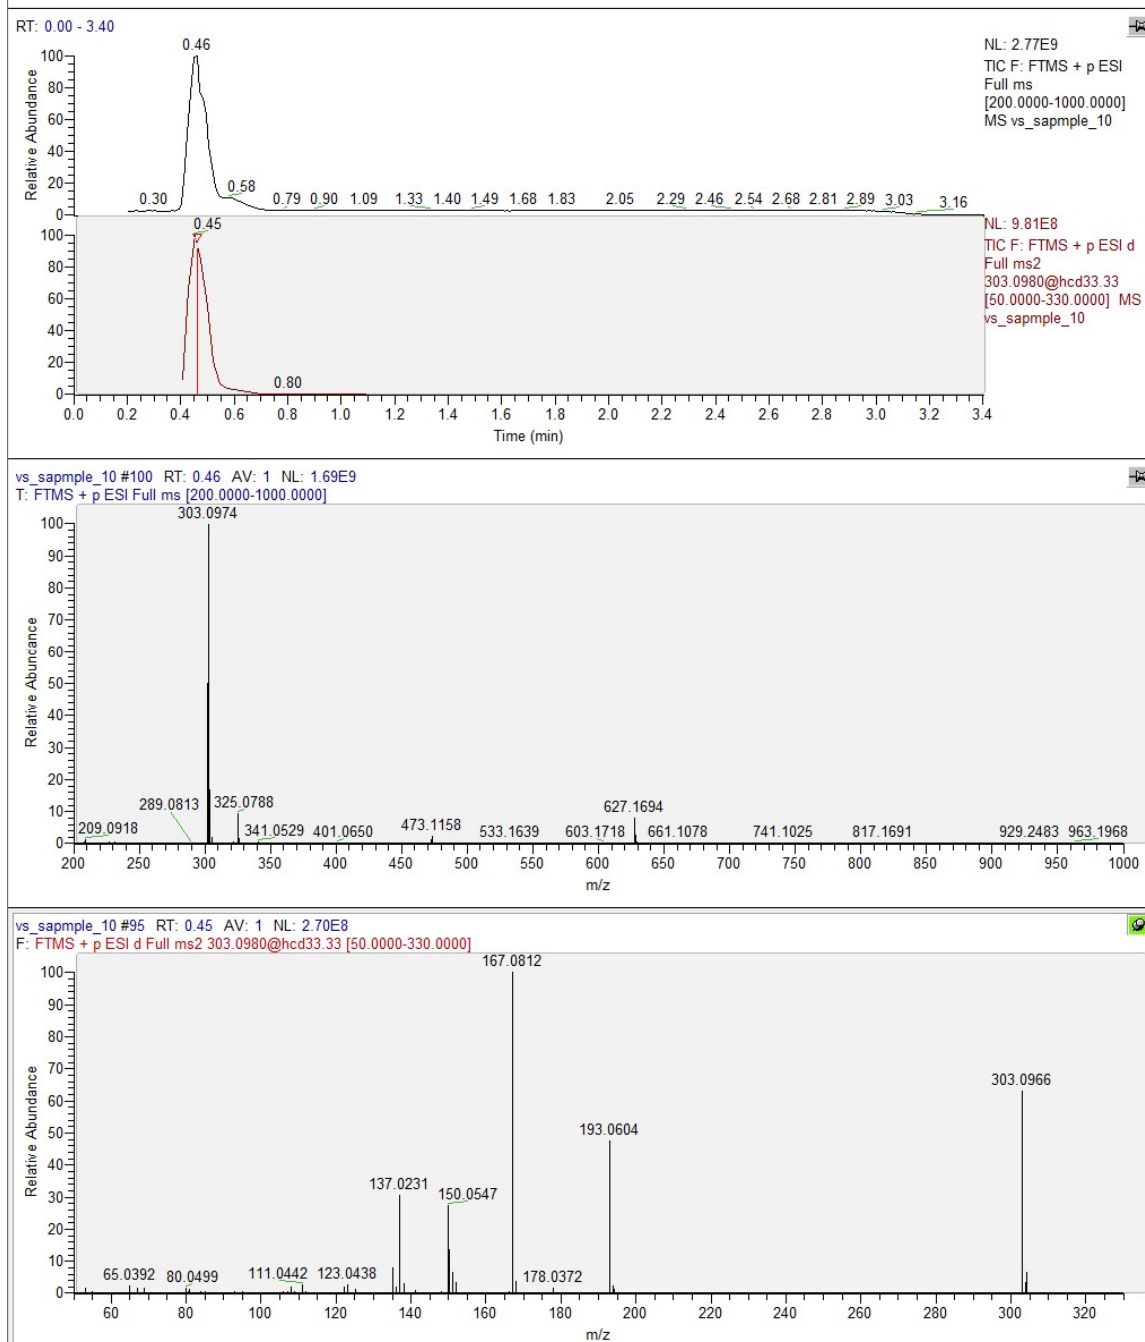**Figure S59. HRMS of compound 3r**

**19. *N'*-[(*E*)-(1-benzylpiperidin-4-yl)methylidene]benzenesulfonohydrazide, 5a**

Yield: 59%; m.p. 110-111°C. <sup>1</sup>H NMR (400 MHz, DMSO-*d*<sub>6</sub>): δ = 1.26-1.36 (m, 2H, CH<sub>2</sub>), 1.54-1.58 (m, 2H, CH<sub>2</sub>), 1.91-1.97 (m, 2H, CH<sub>2</sub>), 2.05-2.14 (m, 1H CH), 2.65-2.68 (m, 2H, CH<sub>2</sub>), 3.40 (s, 2H, CH<sub>2</sub>), 7.19 (d, *J*=4.8 Hz, 1H, CH), 7.21-7.27 (m, 3H, H-2'', H-4'' and H-6''), 7.29-7.33 (m, 2H, H-3'' and H-5''), 7.59-7.63 (m, 2H, H-3' and H-5'), 7.65-7.69 (m, 1H, H-4'), 7.78-7.81 (m, 2H, H-2' and H-6'), 10.93 (1H, s).

<sup>13</sup>C NMR (DMSO) (100 MHz, DMSO-*d*<sub>6</sub>): δ = 27.62 (CH<sub>2</sub>), 36.94 (CH), 51.11 (CH<sub>2</sub>), 61.25 (CH<sub>2</sub>), 125.85 (C-4''), 126.12 (C-2' and C-6'), 127.11 (C-3'' and C-5''), 127.75 (C-2'' and C-6''), 128.07 (C-3' and C-5'), 131.86 (C-4'), 137.28 (C-1''), 137.94 (C-1'), 153.47 (CH). HRMS (ESI) *m/z*: calcd: [M+H]<sup>+</sup> 358.158373. Found: [M+H]<sup>+</sup> 358.1581

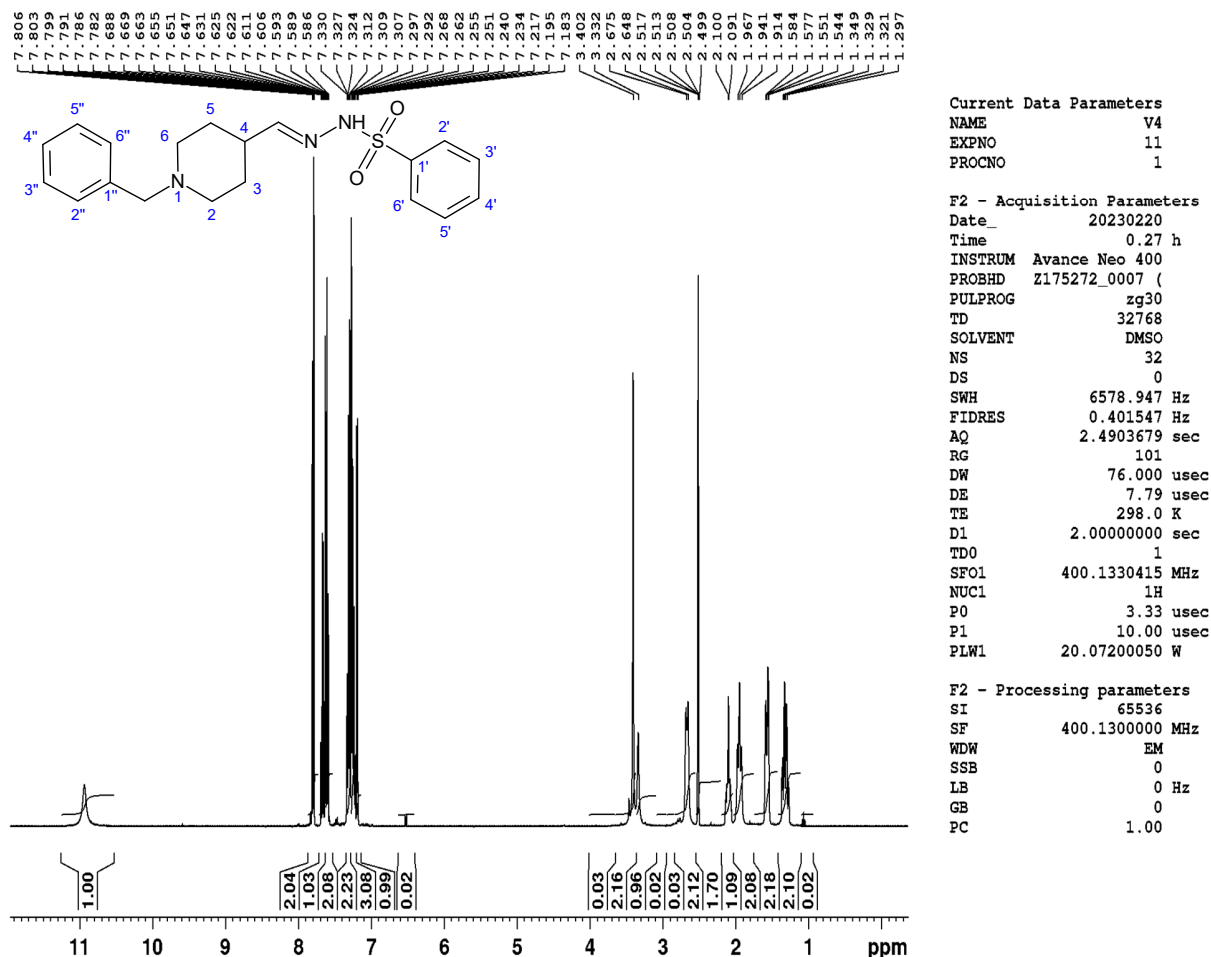

**Figure S60.** <sup>1</sup>H NMR spectrum of compound **5a** in DMSO-*d*<sub>6</sub>



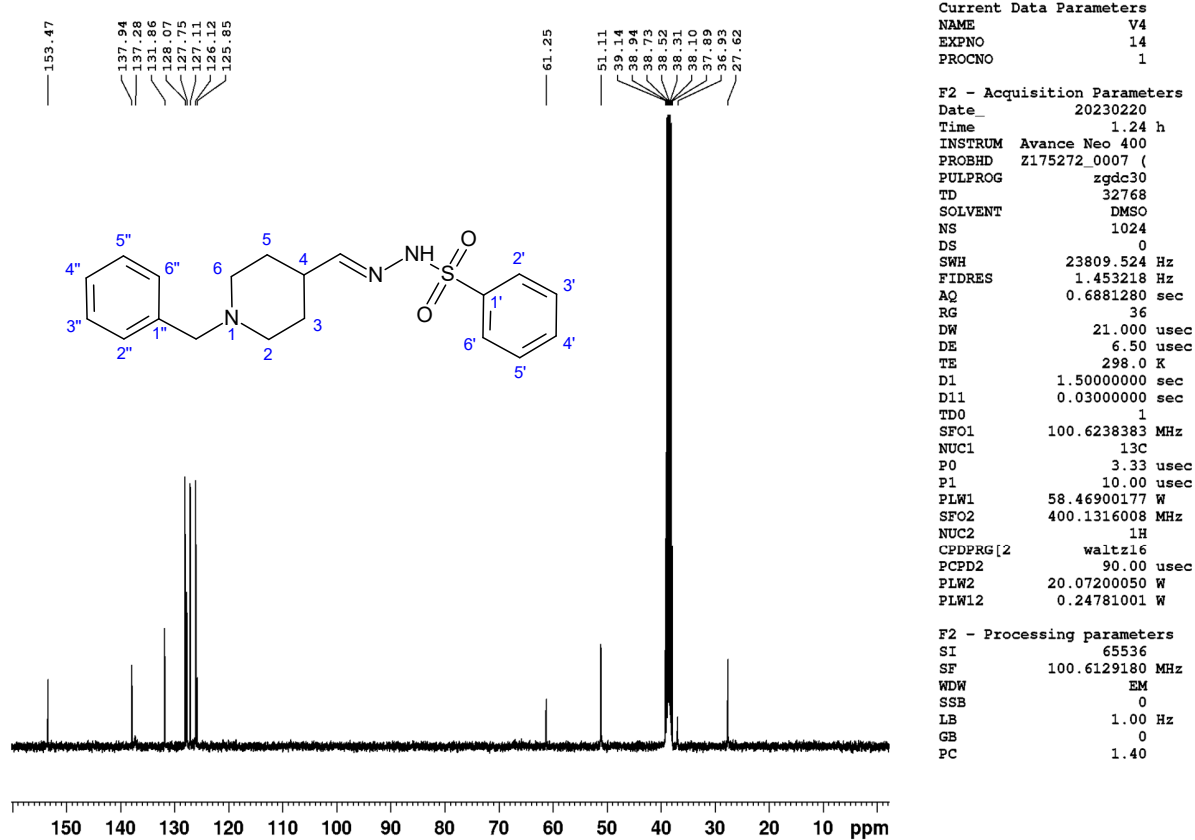

**Figure S61.**  $^{13}\text{C}$  NMR spectrum of compound **5a** in  $\text{DMSO-}d_6$

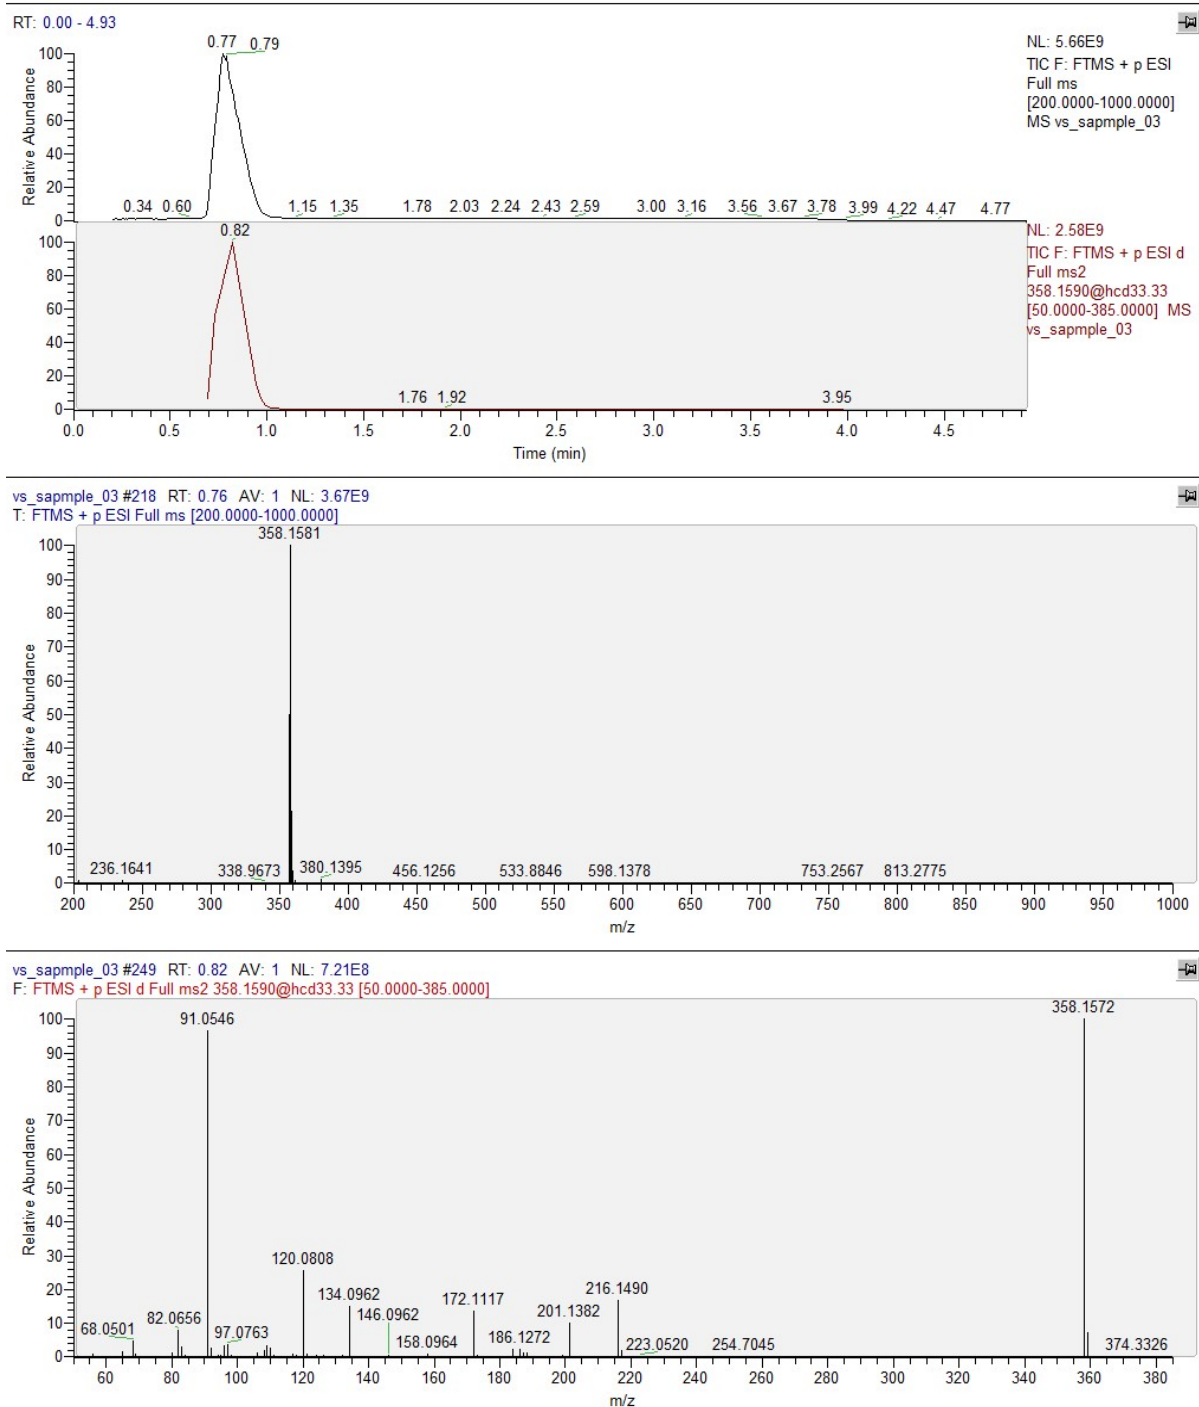

Figure S62. HRMS of 5a

20. 4-methoxy-N'-[(E)-(5-methoxy-1-methyl-1H-indol-3-yl)methylidene]benzenesulfonohydrazide, 5b

Yield: 78%; m.p. 145-146°C.  $^1\text{H}$  NMR (600 MHz, DMSO- $d_6$ ):  $\delta$  = 3.74 (s, 3H, NCH<sub>3</sub>), 3.77 (s, 3H, OCH<sub>3</sub>), 3.80 (s, 3H, OCH<sub>3</sub>), 6.86 (dd,  $J$ =2.6, 8.8 Hz, 1H, H-6), 7.11 (d,  $J$ =9.0 Hz, 2H, H-3' and H-5'), 7.36 (d,  $J$ =8.8 Hz, 1H, H-7), 7.47 (d,  $J$ =2.5 Hz, 1H, H-4), 7.64 (s, 1H, H-2), 7.85 (d,  $J$ =8.8 Hz, 2H, H-2' and H-6'), 8.05 (s, 1H, CH), 10.75 (s, 1H, NH).

$^{13}\text{C}$  NMR (151 MHz, DMSO- $d_6$ ):  $\delta$  = 32.90 (NCH<sub>3</sub>), 55.22 (OCH<sub>3</sub>), 55.64 (OCH<sub>3</sub>), 103.31 (C-4), 109.71 (C-3), 111.01 (C-7), 112.54 (C-6), 114.20 (C-3' and C-5'), 124.90 (C-3a), 129.49 (C-1'), 130.83 (C-2' and C-6'), 132.52 (C-7a), 134.20 (C-2), 145.01 (CH), 154.66 (C-4), 162.45 (C-4'). HRMS (ESI)  $m/z$ : calcd: [M+H]<sup>+</sup> 374.11597. Found: [M+H]<sup>+</sup> 374.1169

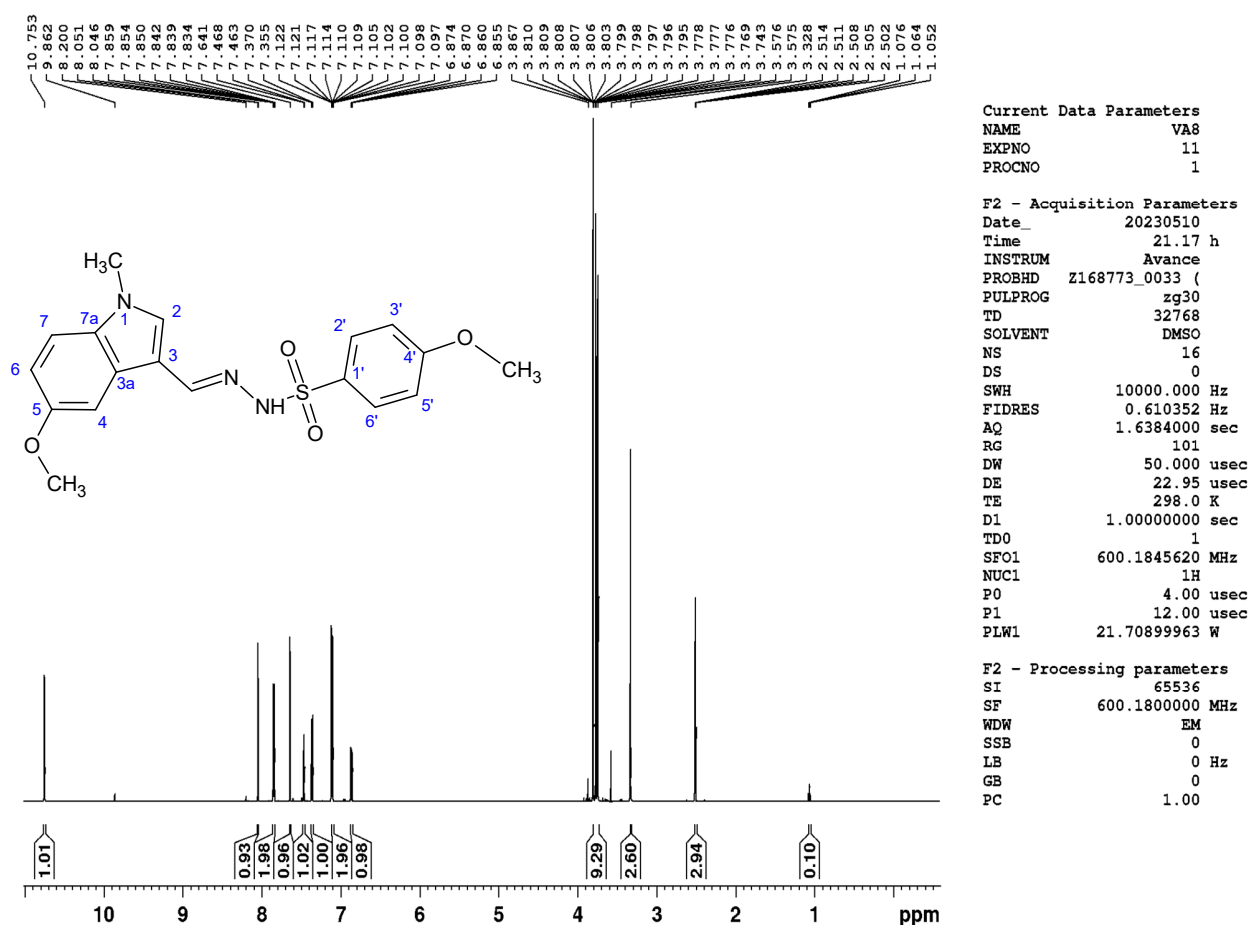

**Figure S63.**  $^1\text{H}$  NMR spectrum of compound **5b** in DMSO- $d_6$

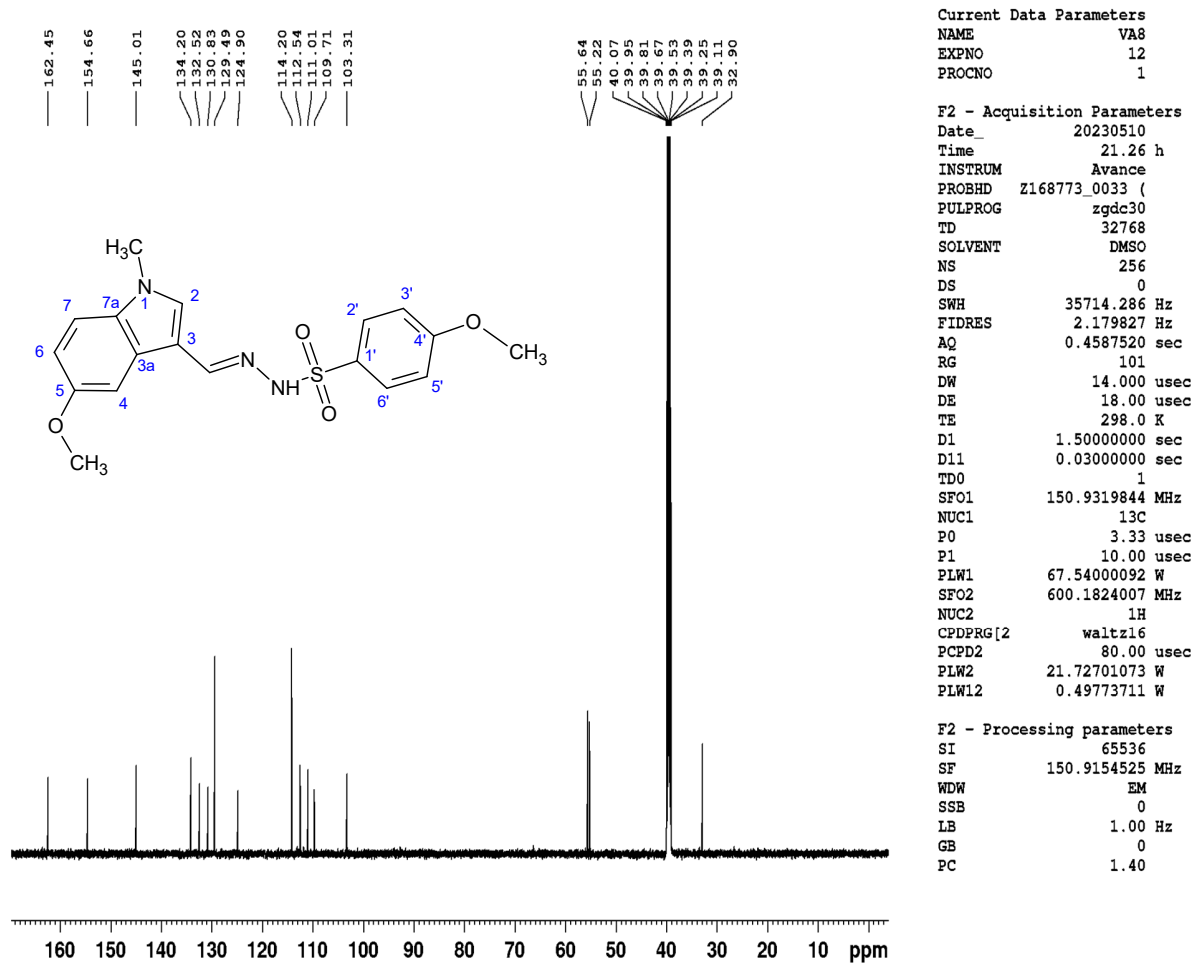

Figure S64. <sup>13</sup>C NMR spectrum of compound **5b** in DMSO-*d*<sub>6</sub>

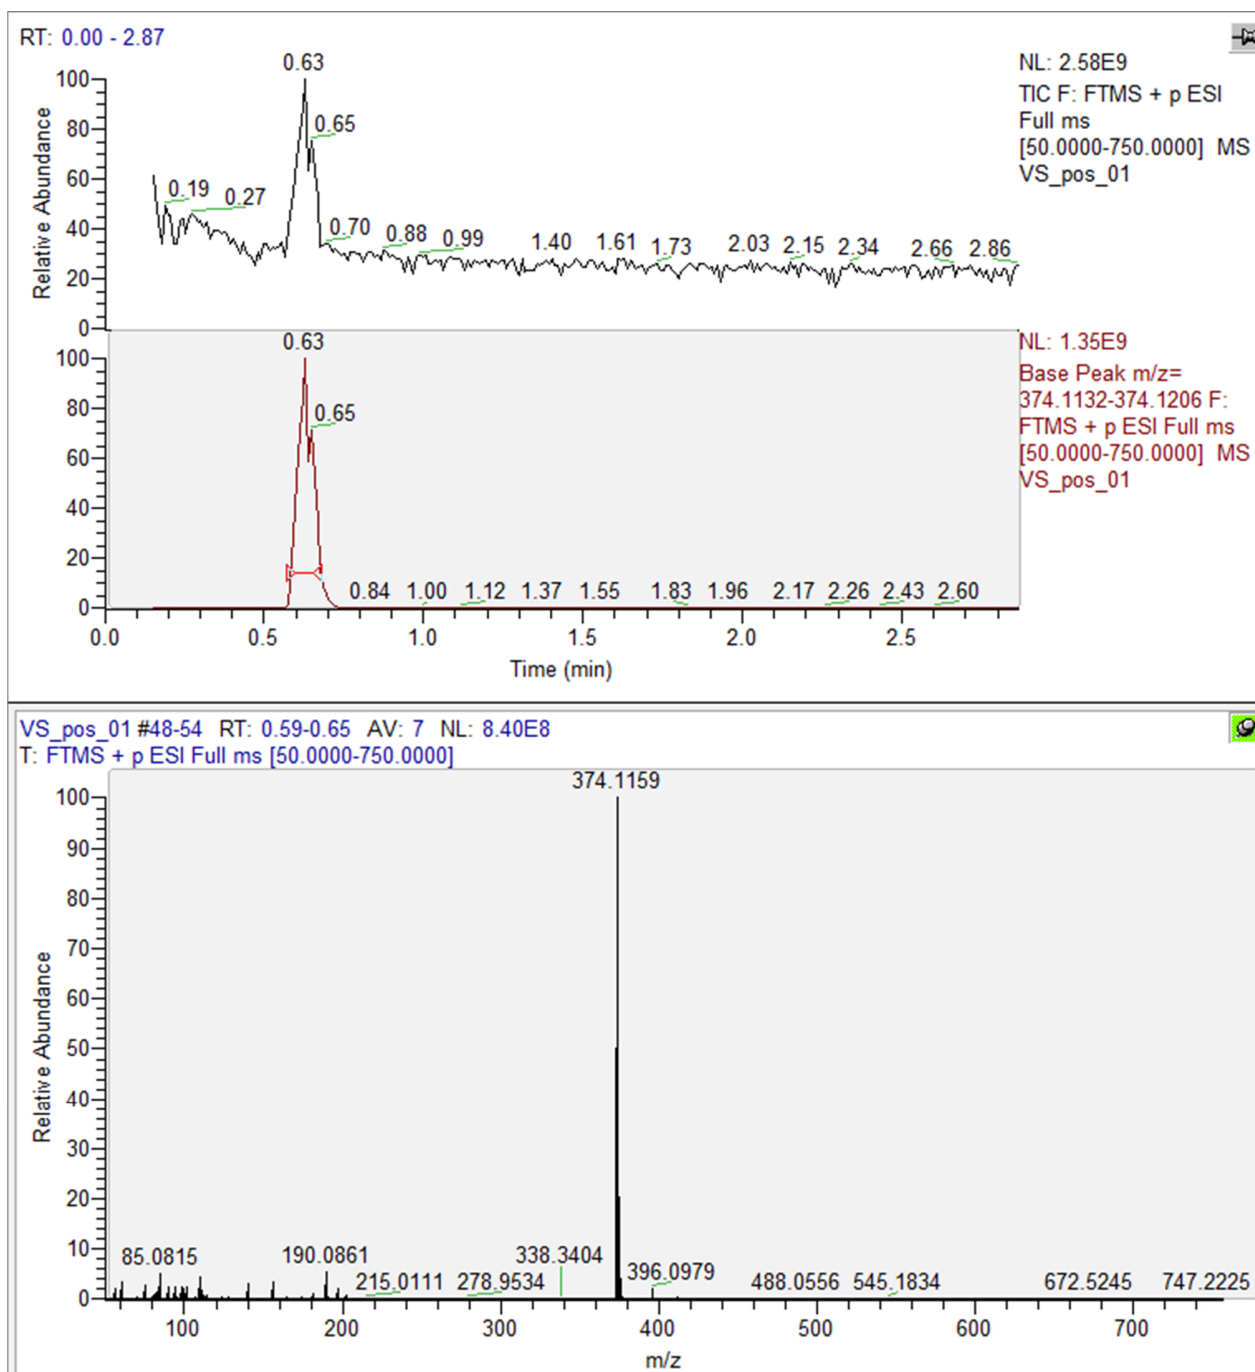

Figure S65. HRMS of compound **5b**

**21. 4-methoxy-N'-[(E)-(5-methoxy-1H-indol-3-yl)methylidene]benzenesulfonylhydrazide, 5c**

Yield: 53%; m.p. 159-163°C.  $^1\text{H}$  NMR (400 MHz, DMSO- $d_6$ ):  $\delta$  = 3.76 (s, 3H, OCH<sub>3</sub>), 3.80 (s, 3H, OCH<sub>3</sub>), 6.80 (dd,  $J$ =2.6, 8.8 Hz, 1H, H-6), 7.11 (d,  $J$ =9.0 Hz, 2H, H-3' and H-5'), 7.29 (d,  $J$ =8.8 Hz, 1H), 7.46 (d,  $J$ =2.6 Hz, 1H, H-4), 7.66 (d,  $J$ =2.8 Hz, 1H, H-2), 7.85 (d,  $J$ =9.0 Hz, 2H, H-2' and H-6'), 8.08 (s, 1H, CH), 10.76 (s, 1H, NH), 11.37 (d,  $J$ =2.2 Hz, 1H, NH).

$^{13}\text{C}$  NMR (100 MHz, DMSO- $d_6$ ):  $\delta$  = 55.15 (OCH<sub>3</sub>), 55.63 (OCH<sub>3</sub>), 103.12 (C-4), 110.85 (C-3), 112.48 (C-7), 112.59 (C-6), 114.19 (C-3' and C-5'), 124.49 (C-3a), 129.48 (C-1'), 130.73 (C-2' and C-6'), 130.84 (C-7a), 131.78 (C-2), 145.46 (CH), 154.35 (C-4), 162.43 (C-4'). HRMS (ESI)  $m/z$ : calcd: [M+H]<sup>+</sup> 360.10125. Found: [M+H]<sup>+</sup> 360.10037

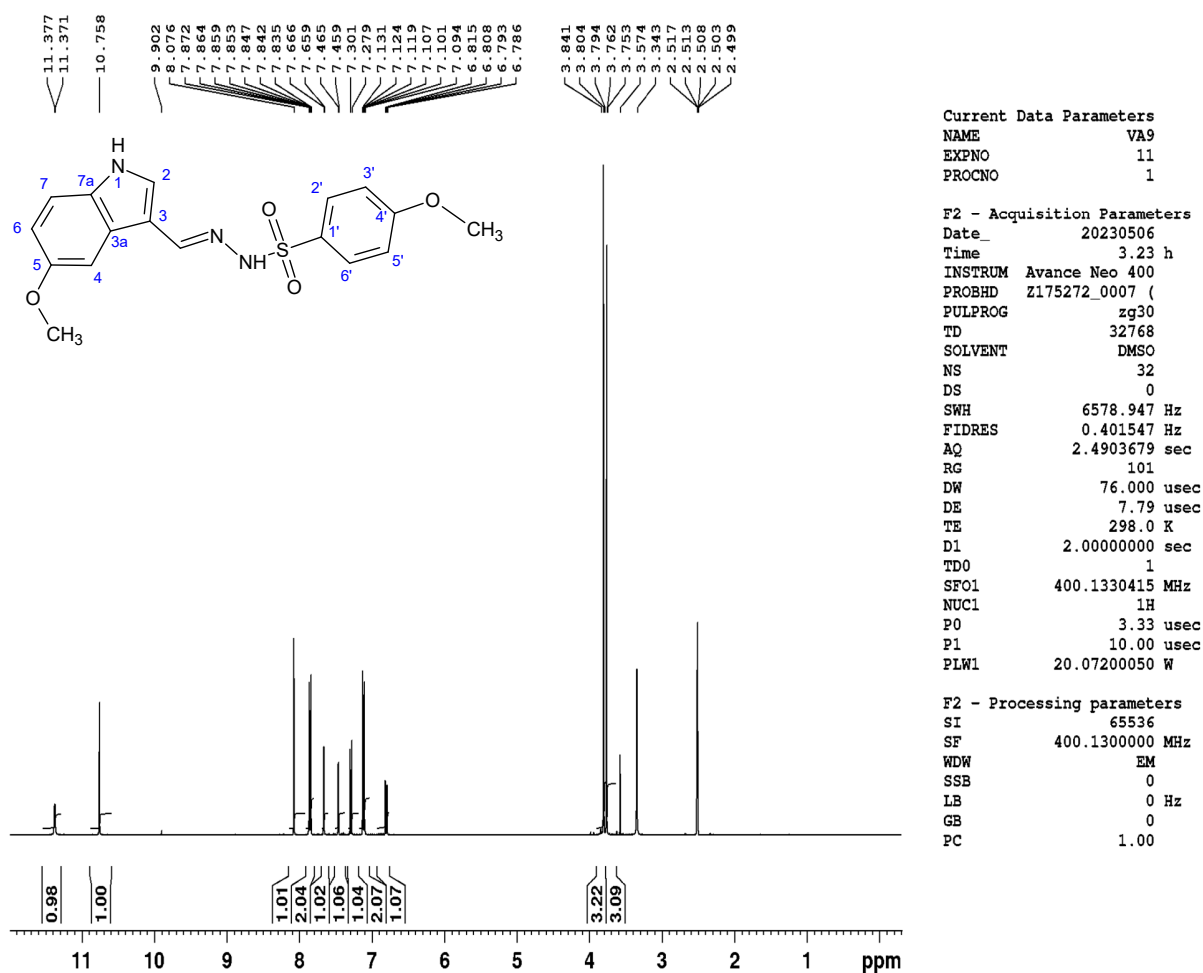

**Figure S66.**  $^1\text{H}$  NMR spectrum of compound **5c** in DMSO- $d_6$

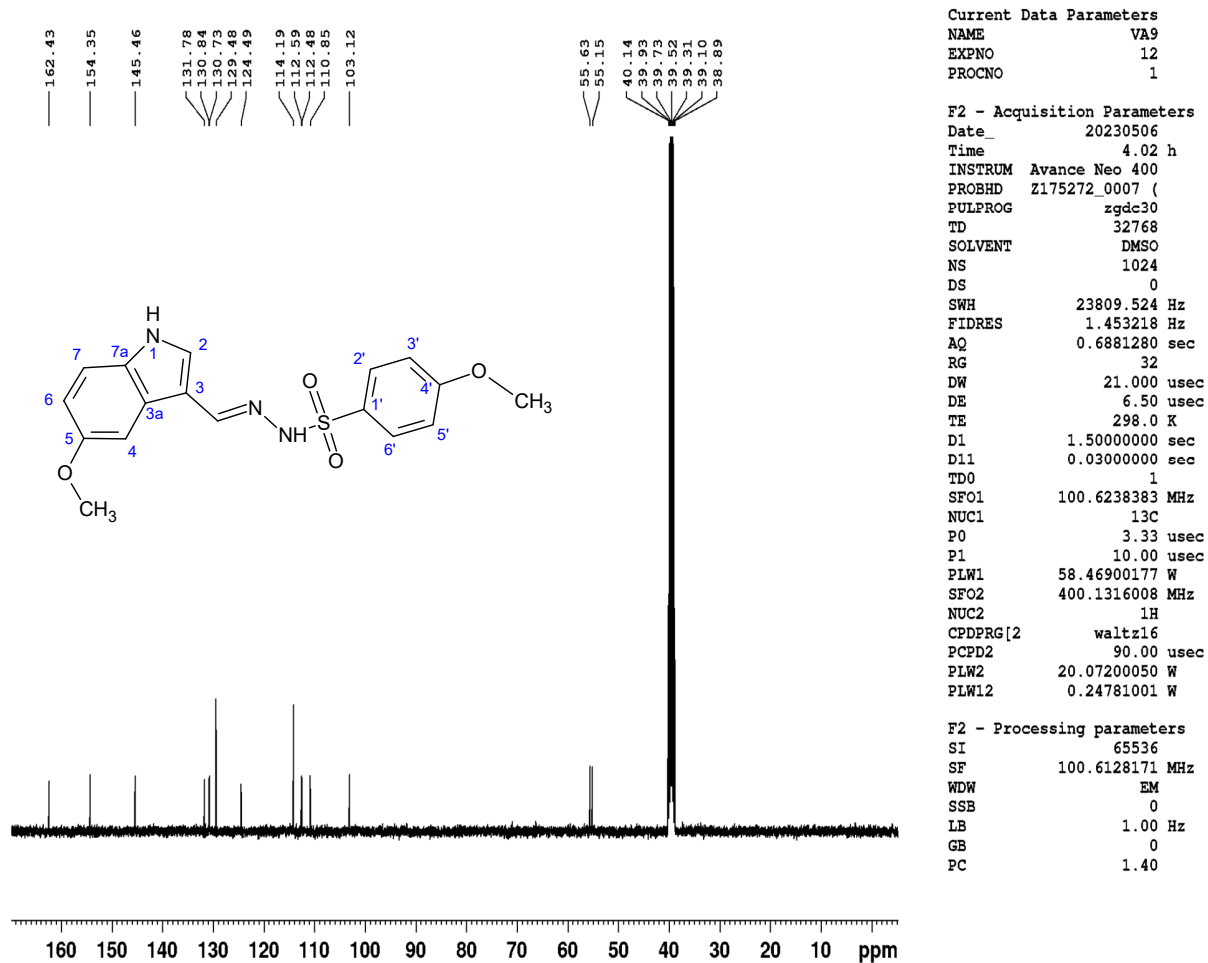

**Figure S67.** <sup>13</sup>C NMR spectrum of compound **5c** in DMSO-*d*<sub>6</sub>

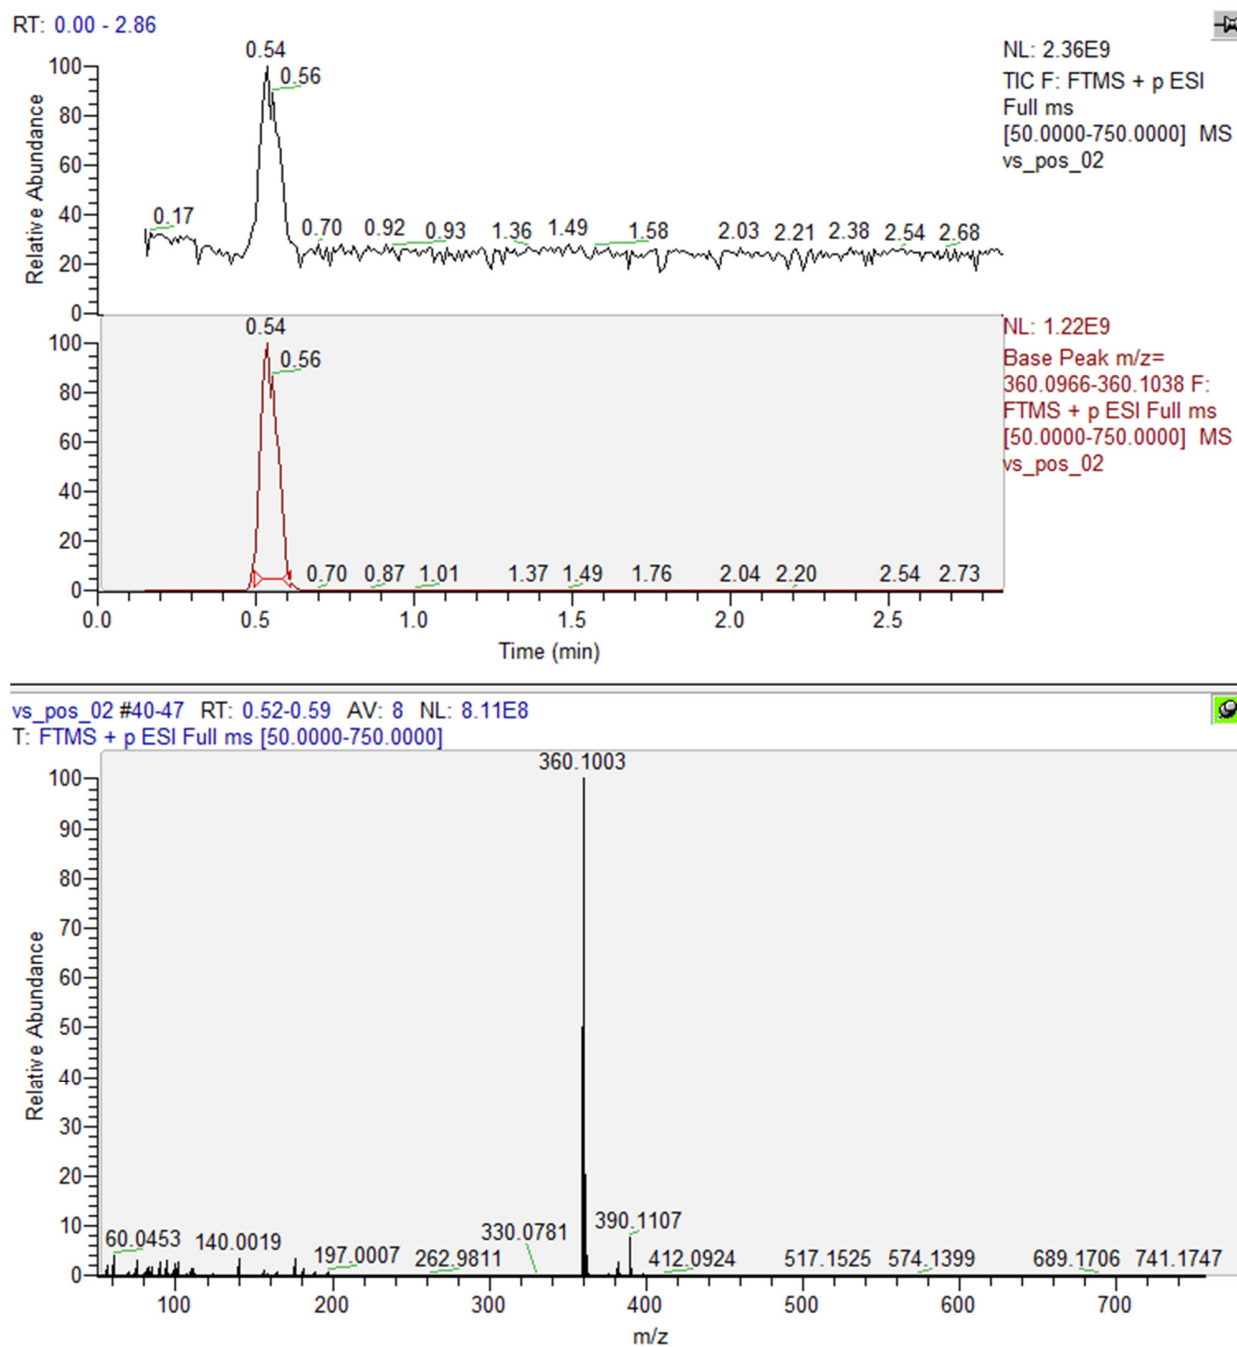

**Figure S68.** HRMS of compound **5c**



## 22. *N'*-(*E*)-(1-benzyl-1*H*-indol-3-yl)methylidene]benzenesulfonohydrazide, **5d**

Yield: 89%; m.p. 146-149°C.  $^1\text{H}$  NMR (600 MHz, DMSO- $d_6$ ):  $\delta$  = 5.41 (s, 3H, CH<sub>2</sub>), 7.15 (t,  $J$ =7.4 Hz, 1H, H-5), 7.18 (ddd,  $J$ =1.2, 7.1, 8.2 Hz, 1H, H-6), 7.21 (d,  $J$ =7.0 Hz, 2H, H-2' and H-6'), 7.24 (t,  $J$ =7.3 Hz, 1H, H-4'), 7.30 (t,  $J$ =7.3 Hz, 2H, H-3' and H-5'), 7.48 (d,  $J$ =8.1 Hz, 1H, H-7), 7.59-7.65 (m, 3H, H-3'', H-4'' and H-5''), 7.90 (s, 1H, H-2), 7.93 (dd,  $J$ =1.0, 7.6 Hz, 2H, H-2'' and H-6''), 7.97 (d,  $J$ =7.8 Hz, 1H, H-4), 8.10 (s, 1H, CH), 11.01 (s, 1H, NH).

$^{13}\text{C}$  NMR (151 MHz, DMSO- $d_6$ ):  $\delta$  = 49.27 (CH<sub>2</sub>), 110.65 (C-3), 110.67 (1C, s), 120.89 (C-5), 121.78 (C-4), 122.79 (C-6), 124.61 (C-3a), 127.09 (C-2' and C-6''), 127.28 (C-2'' and C-6'), 127.51 (C-4'), 128.59 (C-3' and C-5'), 129.05 (C-3'' and V-5''), 132.82 (C-4''), 133.50 (C-2), 136.75 (C-7a), 137.44 (C-1'), 139.13 (C-1''), 144.60 (CH). HRMS (ESI)  $m/z$ : calcd:  $[\text{M}+\text{H}]^+$  390.127073. Found:  $[\text{M}+\text{H}]^+$  390.12604

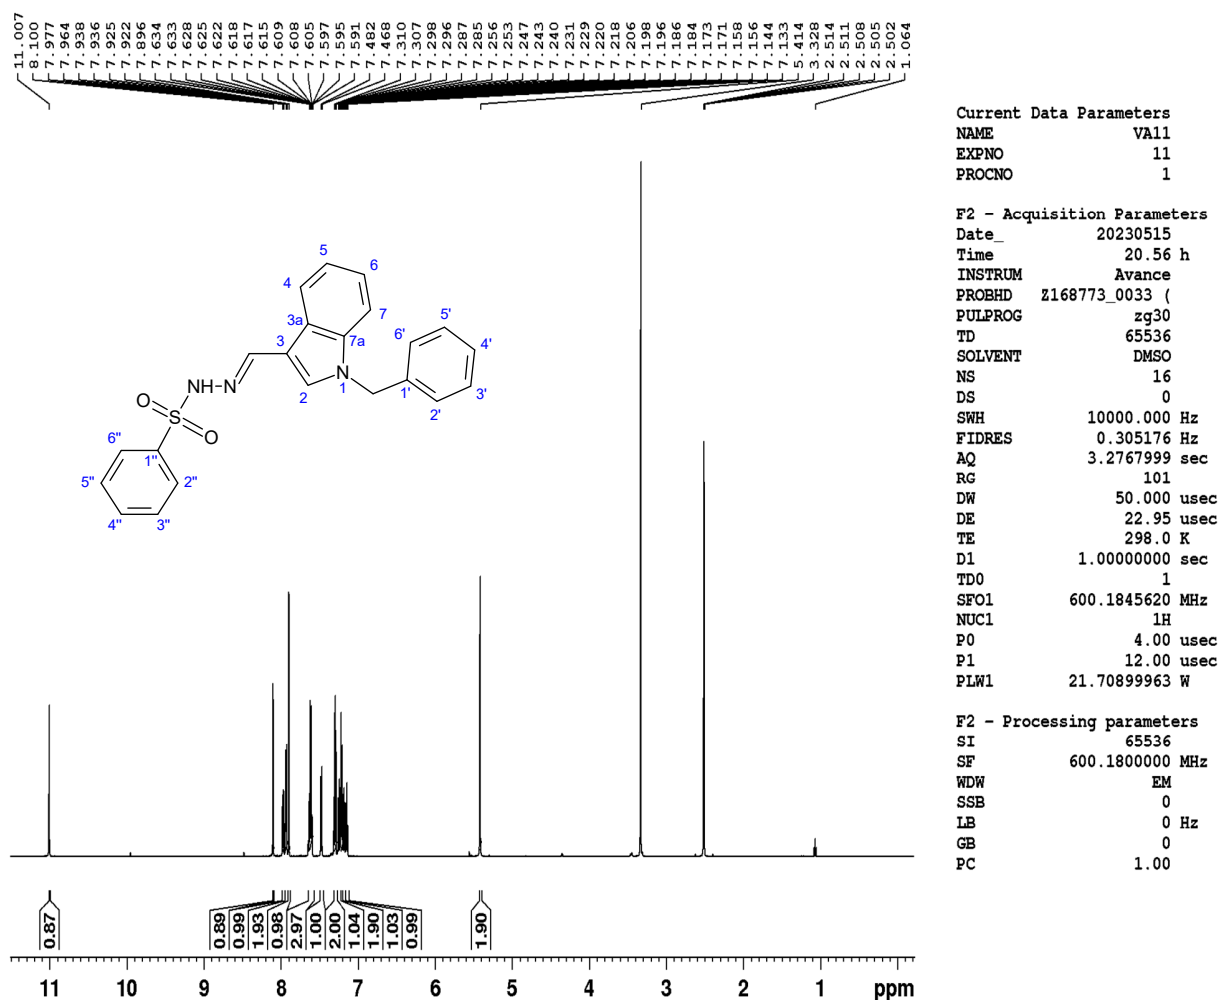

Figure S69.  $^1\text{H}$  NMR spectrum of compound **5d** in DMSO- $d_6$

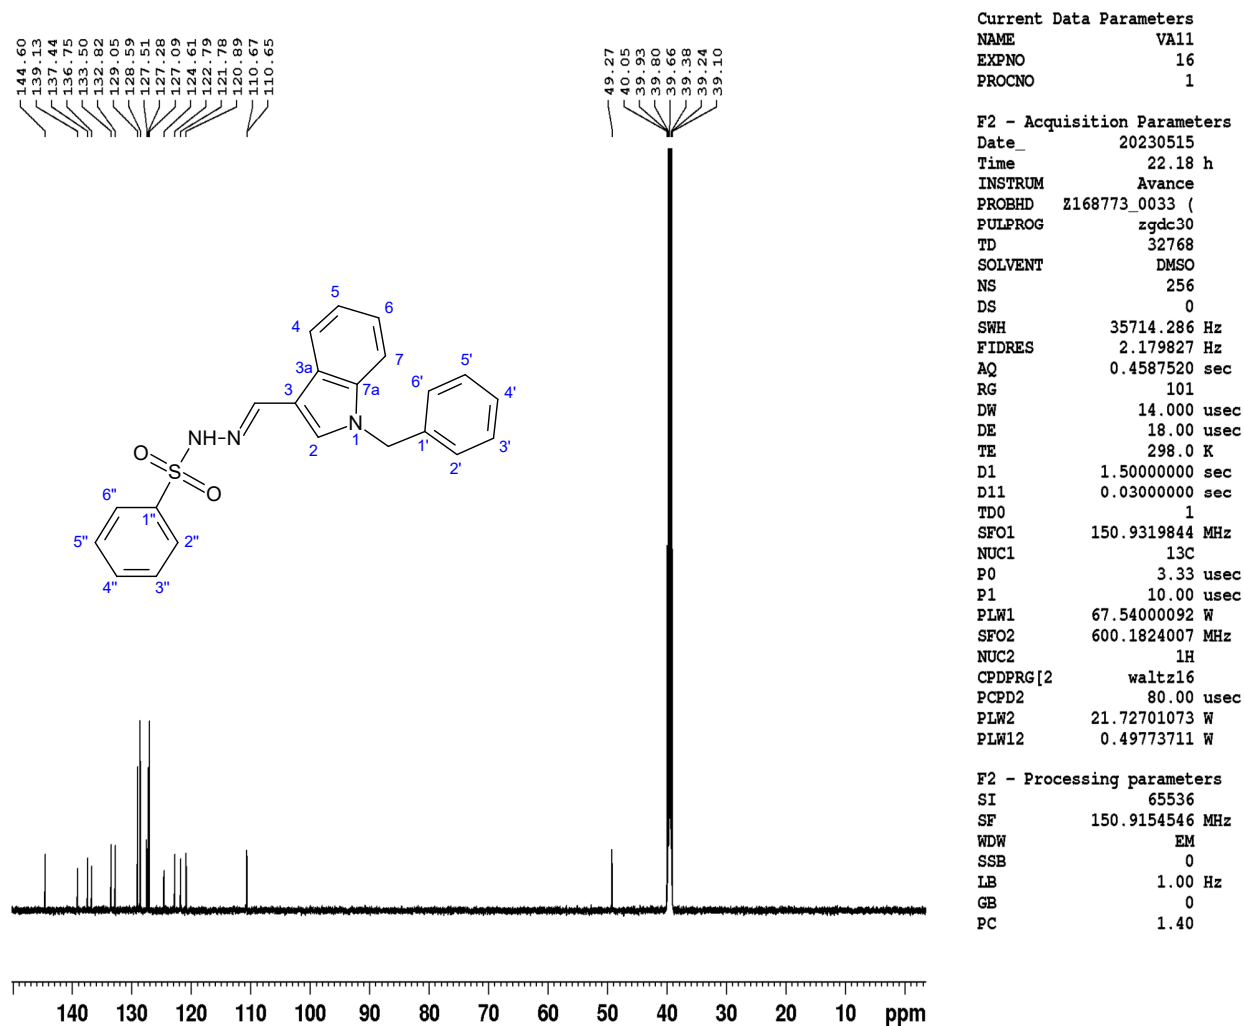

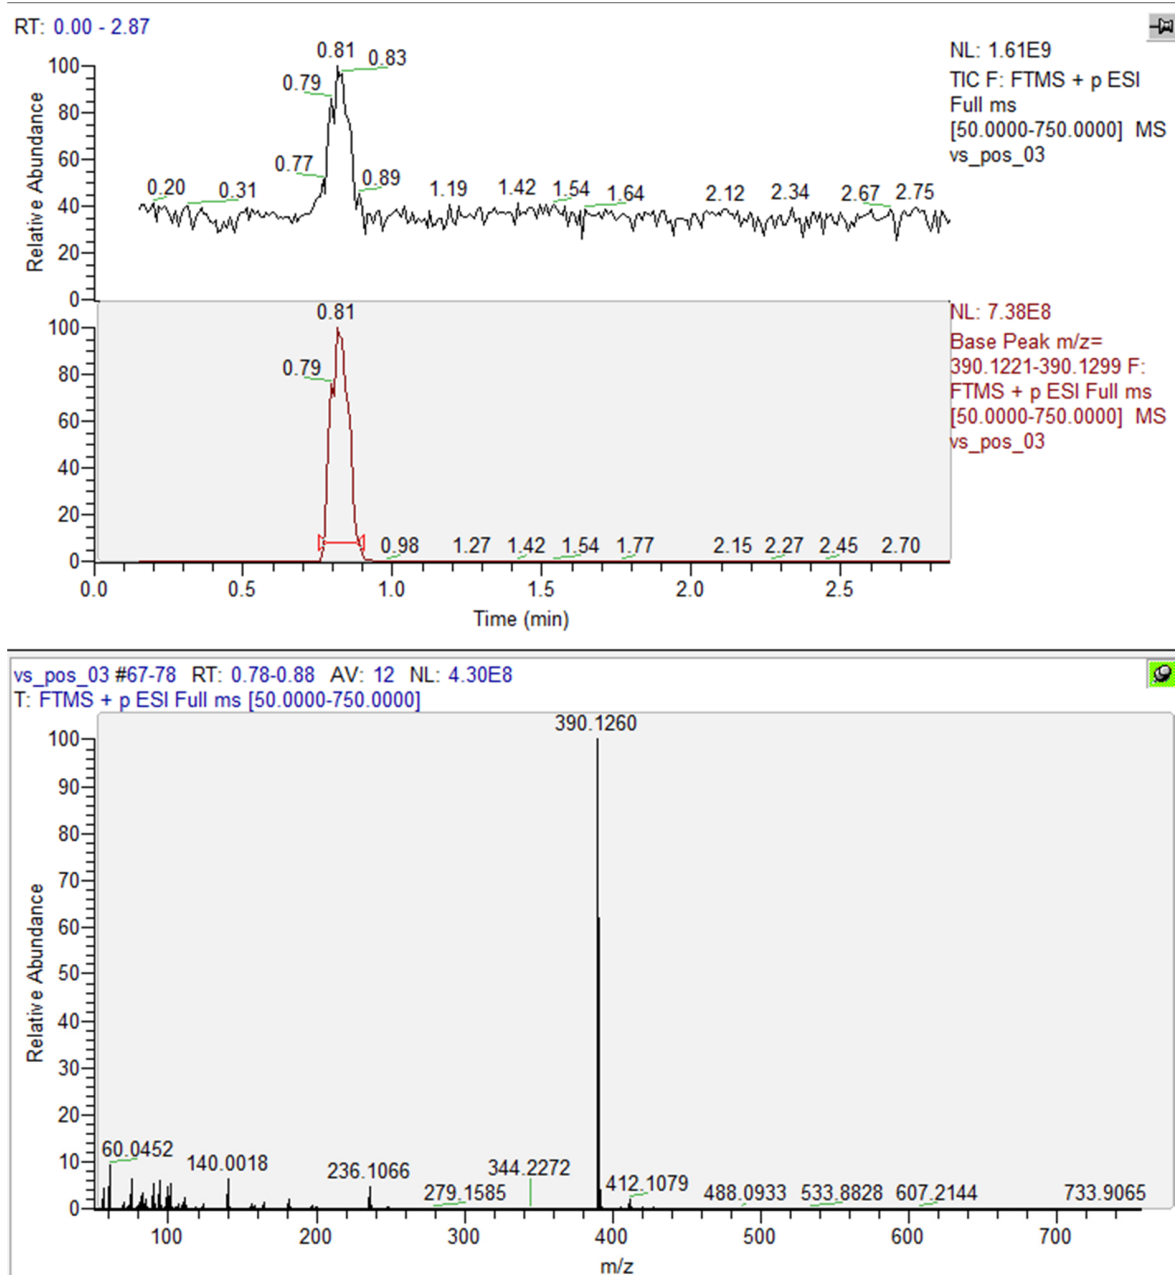

Figure S71. HRMS of compound **5d**

### 23. 4-methoxy-N'-[(E)-(1-methyl-1H-indol-3-yl)methylidene]benzenesulfonylhydrazide, **5e**

Yield: 66%; m.p. 170-175°C. <sup>1</sup>H NMR (600 MHz, DMSO-d<sub>6</sub>): δ = 3.78 (s, 3H, NCH<sub>3</sub>), 3.79 (s, 3H, OCH<sub>3</sub>), 7.11 (d, J=9.0 Hz, 2H, H-3' and H-5'), 7.17 (t, J=7.5 Hz, 1H, H-5), 7.24 (ddd, J=1.1, 7.1, 8.1 Hz, 1H, H-6), 7.46 (d, J=8.2 Hz, 1H, H-7), 7.69 (s, 1H, H-2), 7.84 (d, J=9.0 Hz, 2H, H-2' and H-6'), 7.97 (d, J=7.9 Hz, 1H, H-4), 8.05 (s, 1H, CH), 10.76 (s, 1H, NH).

<sup>13</sup>C NMR (151 MHz, DMSO-d<sub>6</sub>): δ = 32.73 (NCH<sub>3</sub>), 55.61 (OCH<sub>3</sub>), 110.11 (C-3), 110.17 (C-7), 114.18 (C-3' and H-5'), 120.74 (C-5), 121.66 (C-4), 122.62 (C-6), 124.40 (C-3a), 129.48 (C-2' and C-6'), 130.81 (C-2' and C-6'), 133.89 (C-1'), 137.42 (C-7a), 144.44 (CH), 162.44 (C-4'). HRMS (ESI) m/z: calcd: [M+H]<sup>+</sup> 344.106338. Found: [M+H]<sup>+</sup> 344.1055

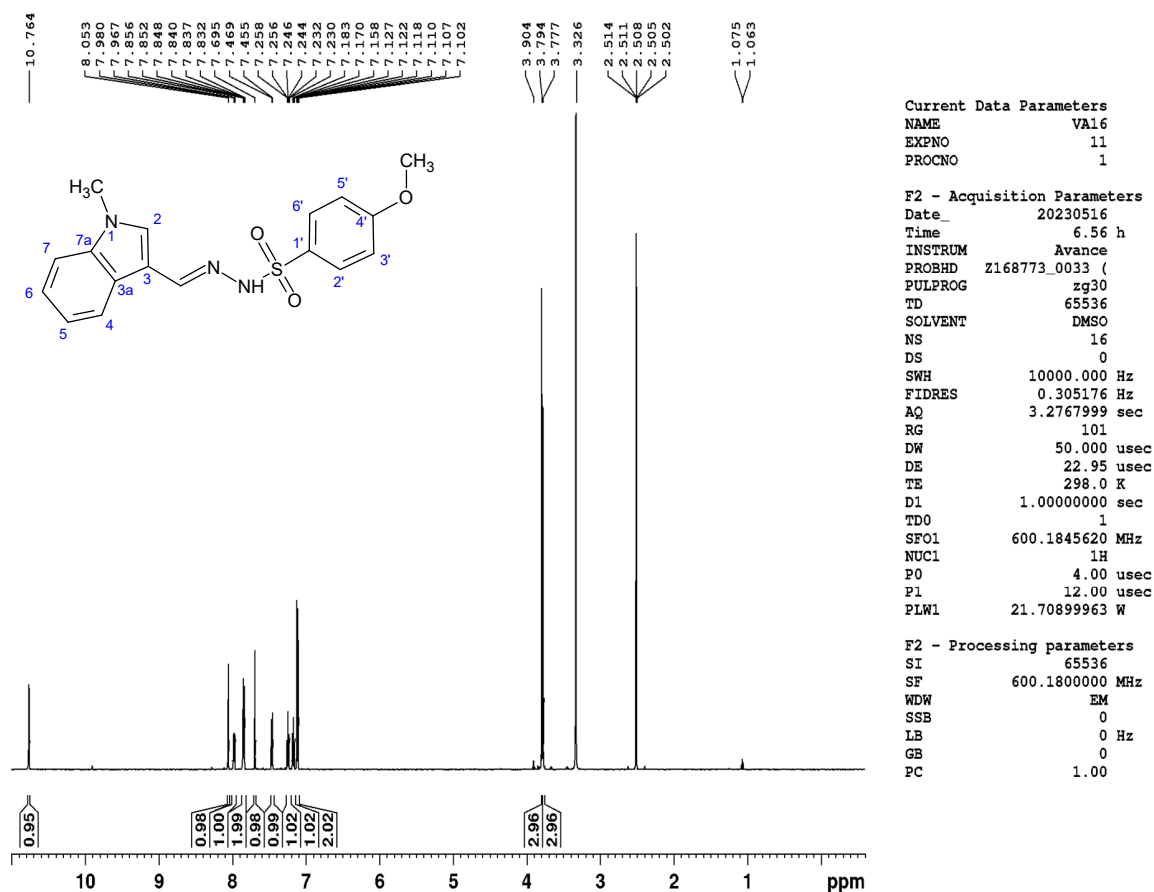

Figure S72. <sup>1</sup>H NMR spectrum of compound **5e** in DMSO-d<sub>6</sub>

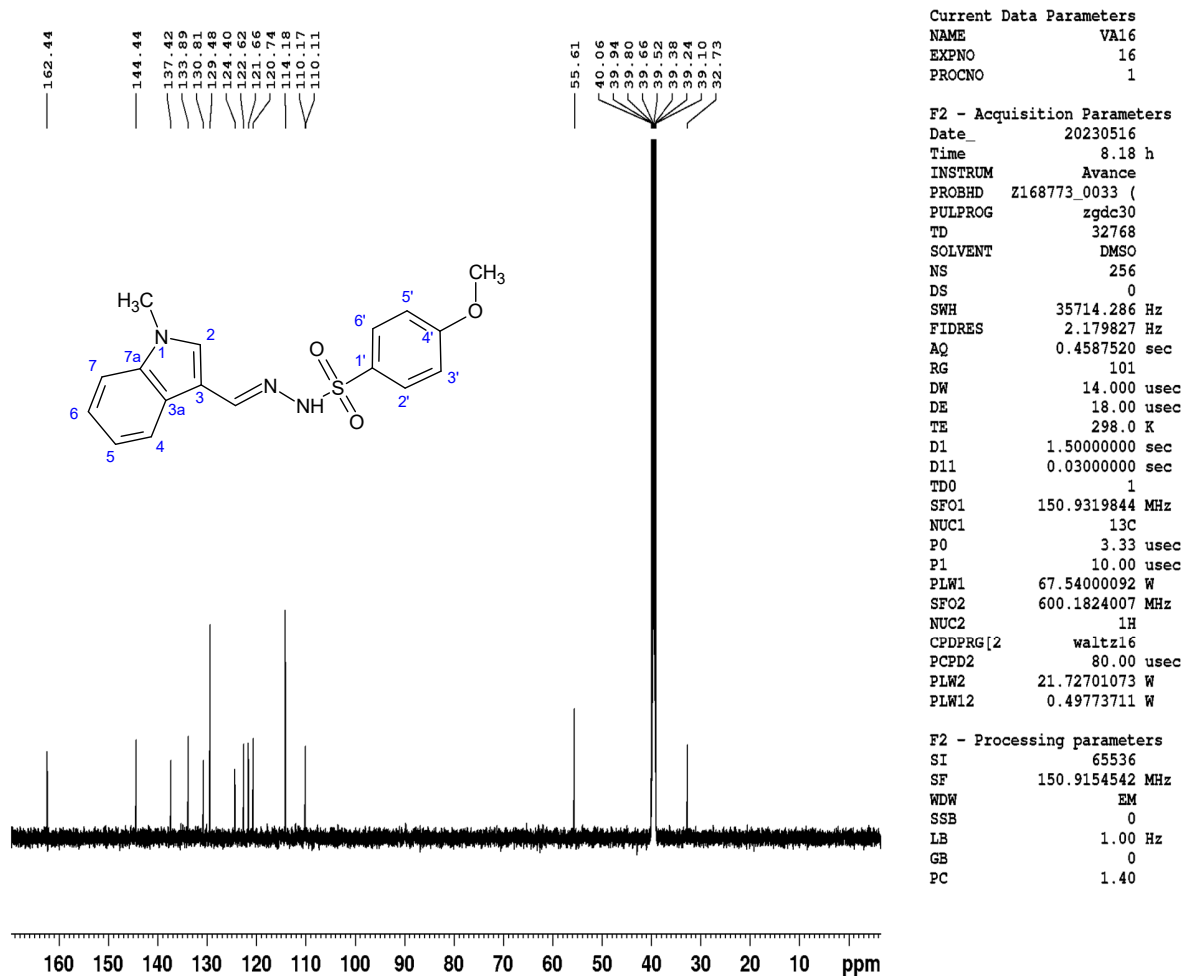

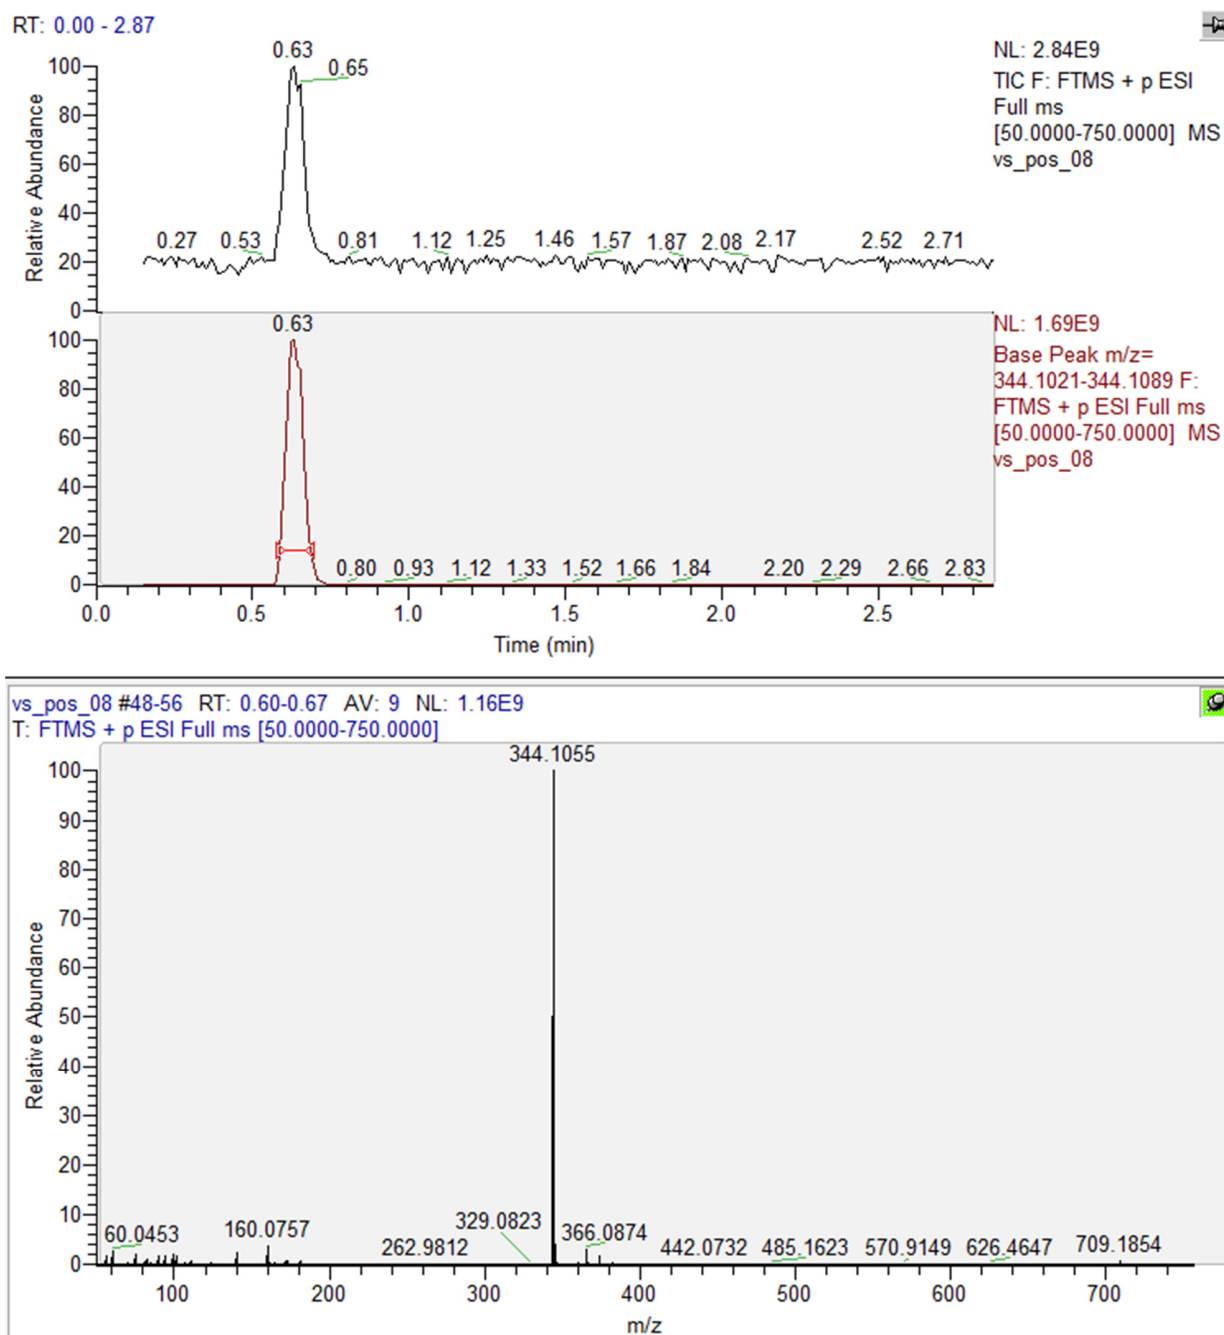

**Figure S74.** HRMS of compound **5e**

24. *N'*-[*(E)*-(5-methoxy-1-methyl-1*H*-indol-3-yl)methylidene]benzenesulfonohydrazide, **5f** [21] <sup>1</sup>H NMR, <sup>13</sup>C NMR and HRMS spectra of compound **5f** can be found in <https://doi.org/10.3390/molecules28052058>

**25. *N'*-[*E*]-(*1*-benzyl-*1H*-indol-3-yl)methylidene]-4-methylbenzenesulfonohydrazide, **5g****

Yield: 79%; m.p. 145-146°C. <sup>1</sup>H NMR (400 MHz, DMSO-d<sub>6</sub>): δ = 2.34 (s, 3H, CH<sub>3</sub>), 5.41 (s, 2H, CH<sub>2</sub>), 7.13-7.32 (m, 7H, H-5, H-6, H-2'', H-3'', H-4'', H-5'' and H-6''), 7.39 (d, J=7.9 Hz, 2H, H-3' and H-5'), 7.48 (dd, J=1.3, 7.1 Hz, 1H, H-7), 7.81 (d, J=8.2 Hz, 2H, H-2' and H-6'), 7.89 (s, 1H, H-2), 7.99 (d, J=7.3 Hz, 1H, H-4), 8.08 (s, 1H, CH), 10.92 (s, 1H, NH).

<sup>13</sup>C NMR (100 MHz, DMSO-d<sub>6</sub>): δ = 20.95 (CH<sub>3</sub>), 49.26 (CH<sub>2</sub>), 110.66 (C-7), 110.72 (C-3), 120.88 (C-5), 121.83 (C-4), 122.78 (C-6), 124.63 (C-4a), 127.08 (C-2'' and C-6''), 127.33 (C-2' and C-6'), 127.51 (C-4''), 128.59 (C-3'' and C-5''), 129.47 (C-3' and C-5'), 133.41 (C-2), 136.26 (C-1'), 136.74 (C-7a), 137.46 (C-1''), 143.16 (C-4'), 144.32 (C-H). HRMS (ESI) m/z: calcd: [M+H]<sup>+</sup> 404.142723. Found: [M+H]<sup>+</sup> 404.1425

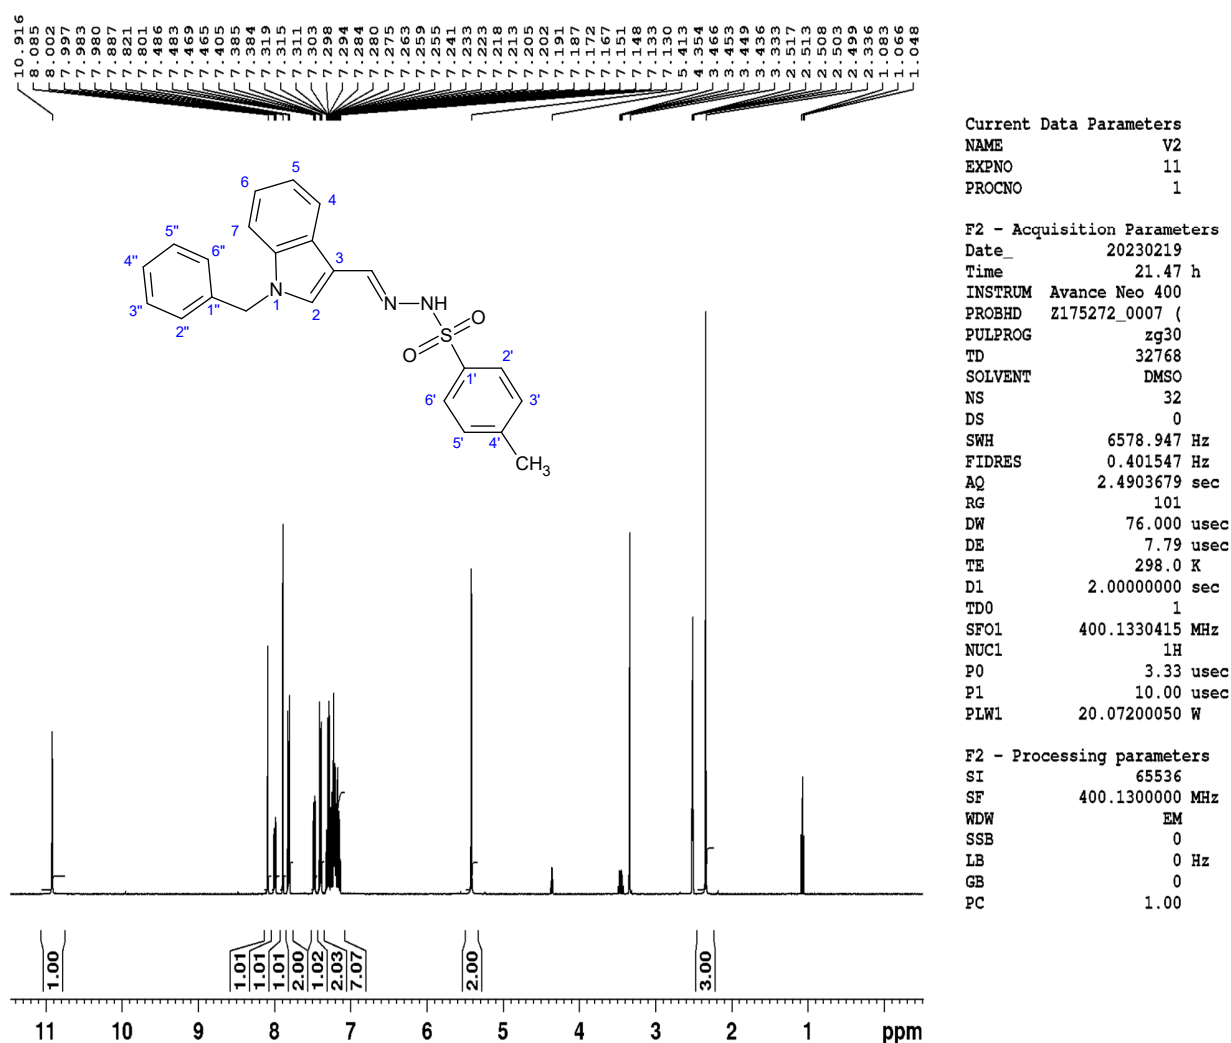

**Figure S75.** <sup>1</sup>H NMR spectrum of compound **5g** in DMSO-d<sub>6</sub>

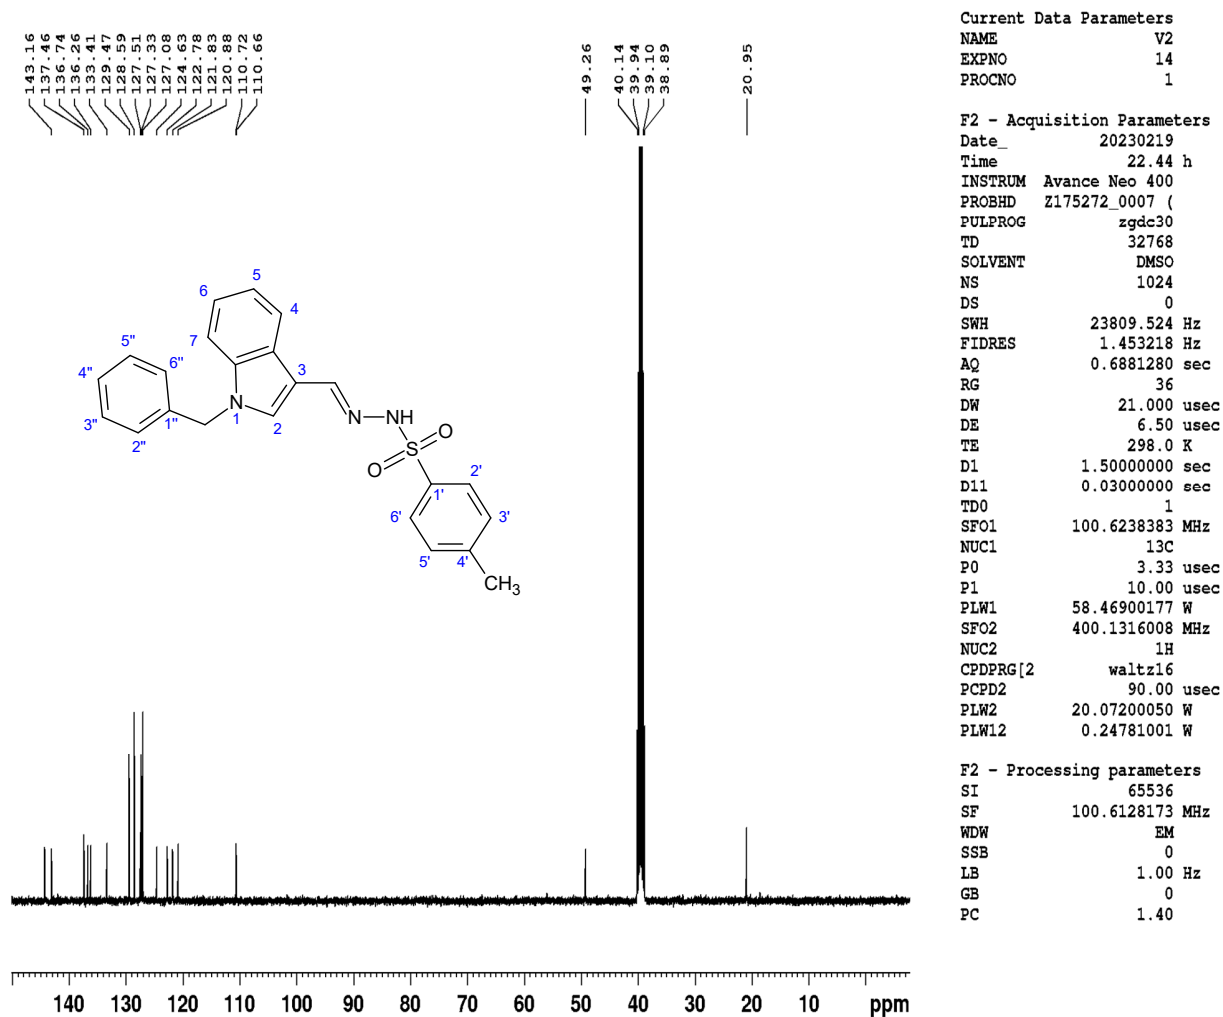

**Figure S76.** <sup>13</sup>C NMR spectrum of compound **5g** in DMSO-*d*<sub>6</sub>



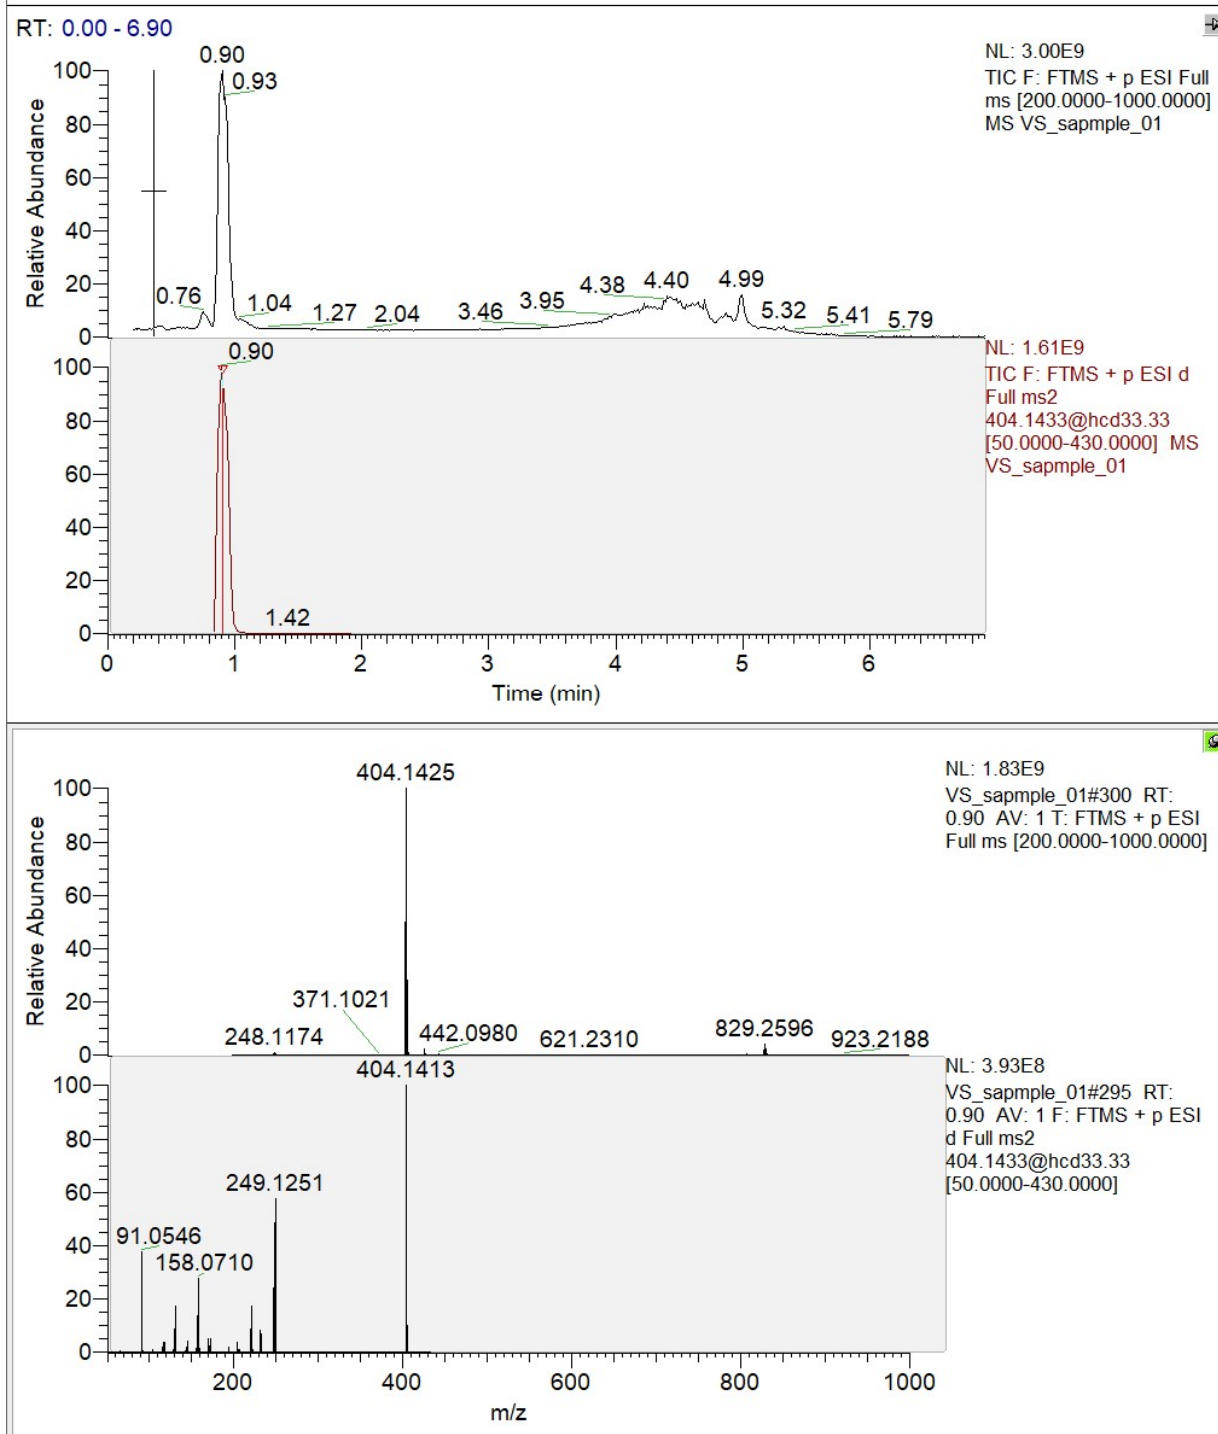

Figure S77. HRMS of compound **5g**

26. *N'*-[(*E*)-(3,4-dimethoxyphenyl)methylidene]-4-methylbenzenesulfonohydrazide, **5h** [31] <sup>1</sup>H NMR, <sup>13</sup>C NMR and HRMS spectra of compound **5h** can be found in <https://doi.org/10.3390/molecules28052058>

27. *N'-[(E)-(3,4-dimethoxyphenyl)methylidene]benzenesulfonohydrazide, 5i* [2]  $^1\text{H}$  NMR,  $^{13}\text{C}$  NMR and HRMS spectra of compound **5i** can be found in <https://doi.org/10.3390/molecules28052058>

28. *N'-[(E)-[5-(benzyloxy)-1H-indol-3-yl]methylidene]-4-methylbenzenesulfonohydrazide, 5j*

Yield: 67%; m.p. 222-223°C.  $^1\text{H}$  NMR (400 MHz, DMSO- $d_6$ ):  $\delta$  = 2.28 (s, 3H, CH<sub>3</sub>), 5.03 (s, 2H, CH<sub>2</sub>), 6.88 (dd,  $J$ =2.5, 8.8 Hz, 1H, H-6), 7.30 (d,  $J$ =8.8 Hz, 1H, H-7), 7.34 (d,  $J$ =8.1 Hz, 2H, H-3' and H-5'), 7.36 (t,  $J$ =7.2 Hz, 1H, H-4''), 7.43 (t,  $J$ =7.4 Hz, 2H, H-3'' and H-5''), 7.53 (d,  $J$ =7.2 Hz, 2H, H-2'' and H-6''), 7.57 (d,  $J$ =2.4 Hz, 1H, H-4), 7.68 (d,  $J$ =2.8 Hz, 1H, H-2), 7.81 (d,  $J$ =8.2 Hz, 2H, H-2' and H-6'), 8.09 (s, 1H, CH), 10.84 (s, 1H, NH), 11.40 (d,  $J$ =2.0 Hz, 1H, NH).

$^{13}\text{C}$  NMR (100 MHz, DMSO- $d_6$ ):  $\delta$  = 20.90 (CH<sub>3</sub>), 69.68 (CH<sub>2</sub>), 104.82 (C-4), 110.81 (C-3), 112.50 (C-6), 113.02 (C-7), 124.48 (C-4a), 127.37 (C-2' and C-6'), 127.84 (C-4''), 127.93 (C-2'' and C-6''), 128.46 (H-3'' and H-5''), 129.41 (C-3' and C-5'), 130.96 (C-2), 131.98 (C-7a), 136.33 (C-1'), 137.35 (C-1''), 143.08 (C-4'), 145.68 (CH), 153.38 (C-5). HRMS (ESI)  $m/z$ : calcd: [M+H]<sup>+</sup> 404.142723. Found: [M+H]<sup>+</sup> 420.1373

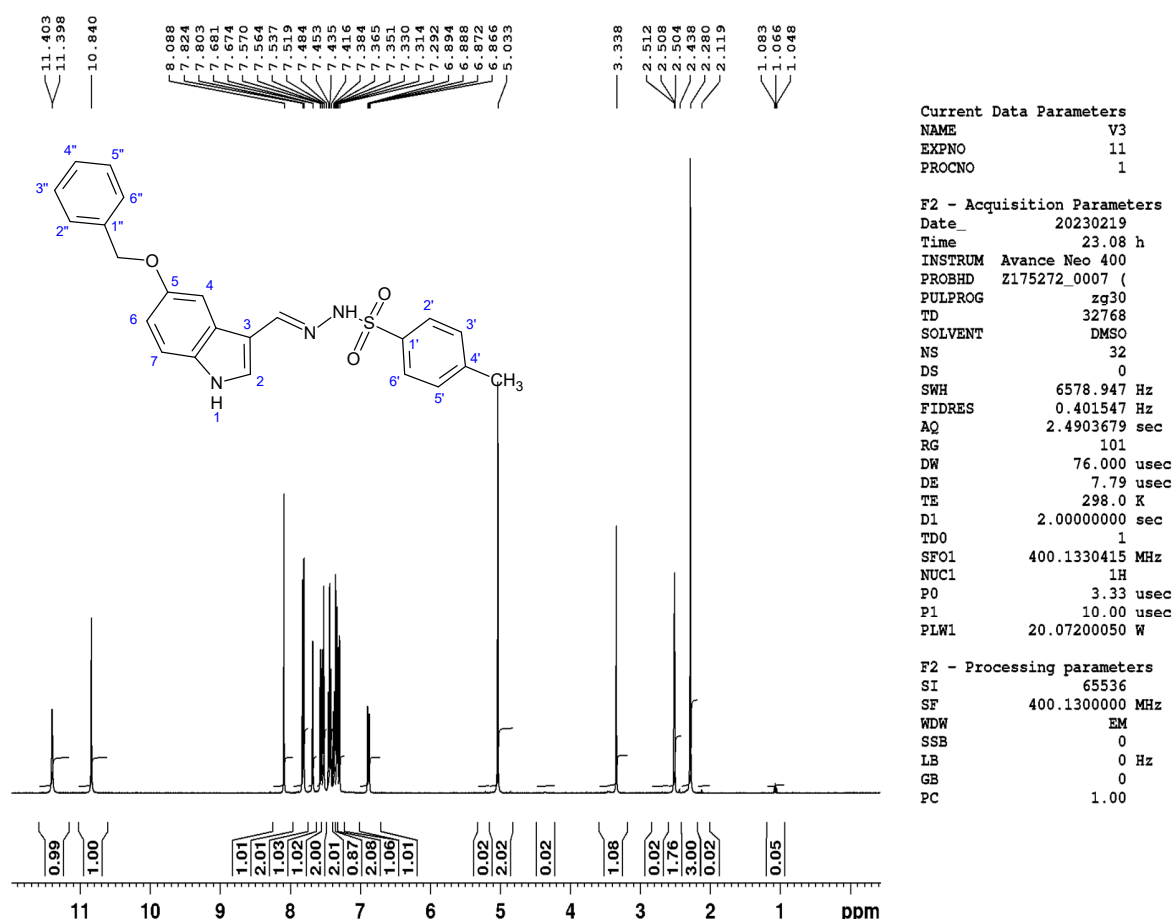

Figure S78.  $^1\text{H}$  NMR spectrum of compound **5j** in DMSO- $d_6$

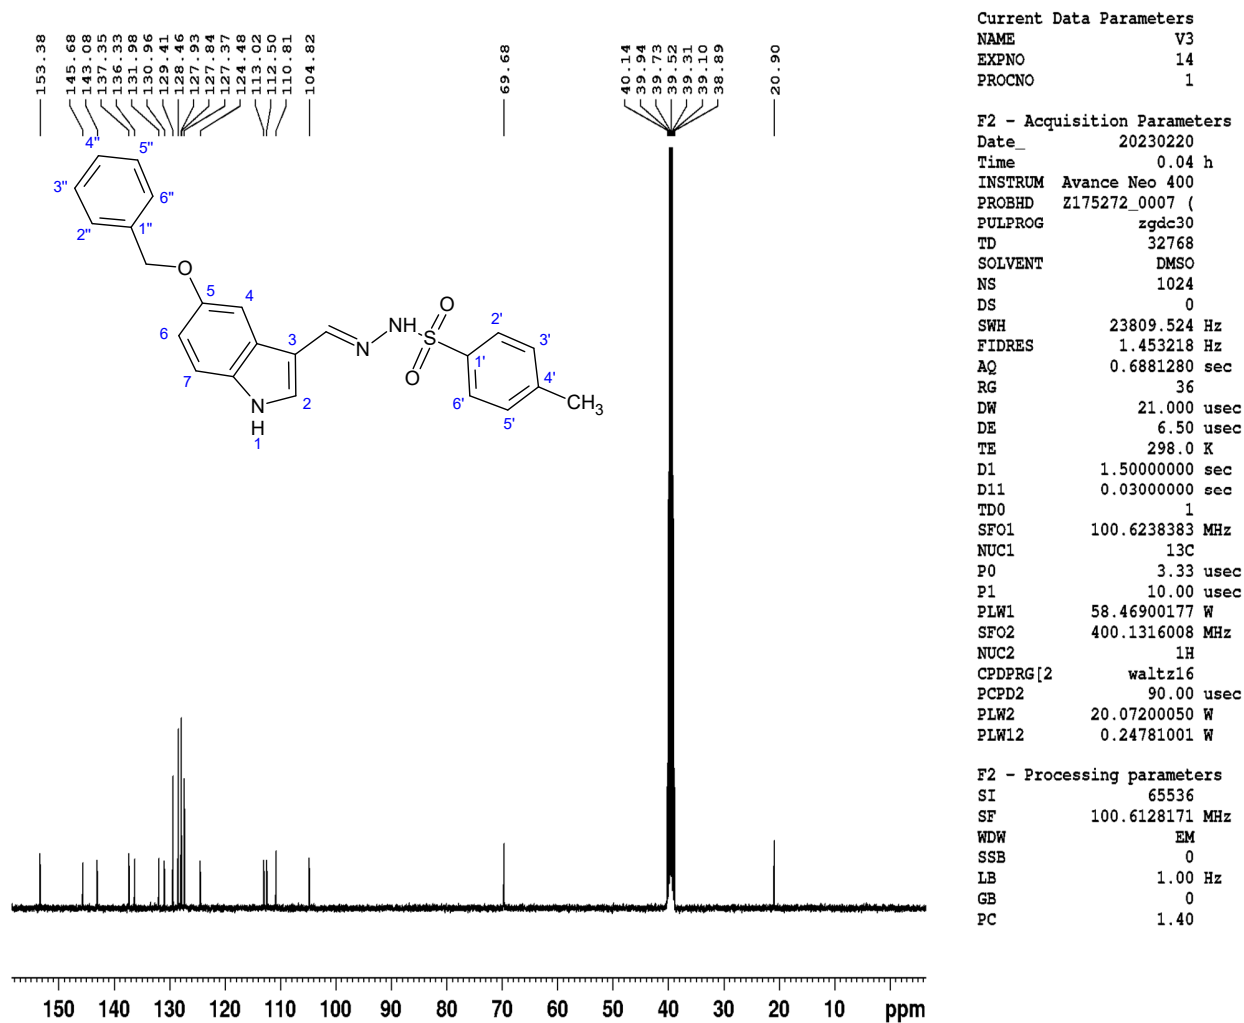

Figure S79. <sup>13</sup>C NMR spectrum of compound **5j** in DMSO-*d*<sub>6</sub>

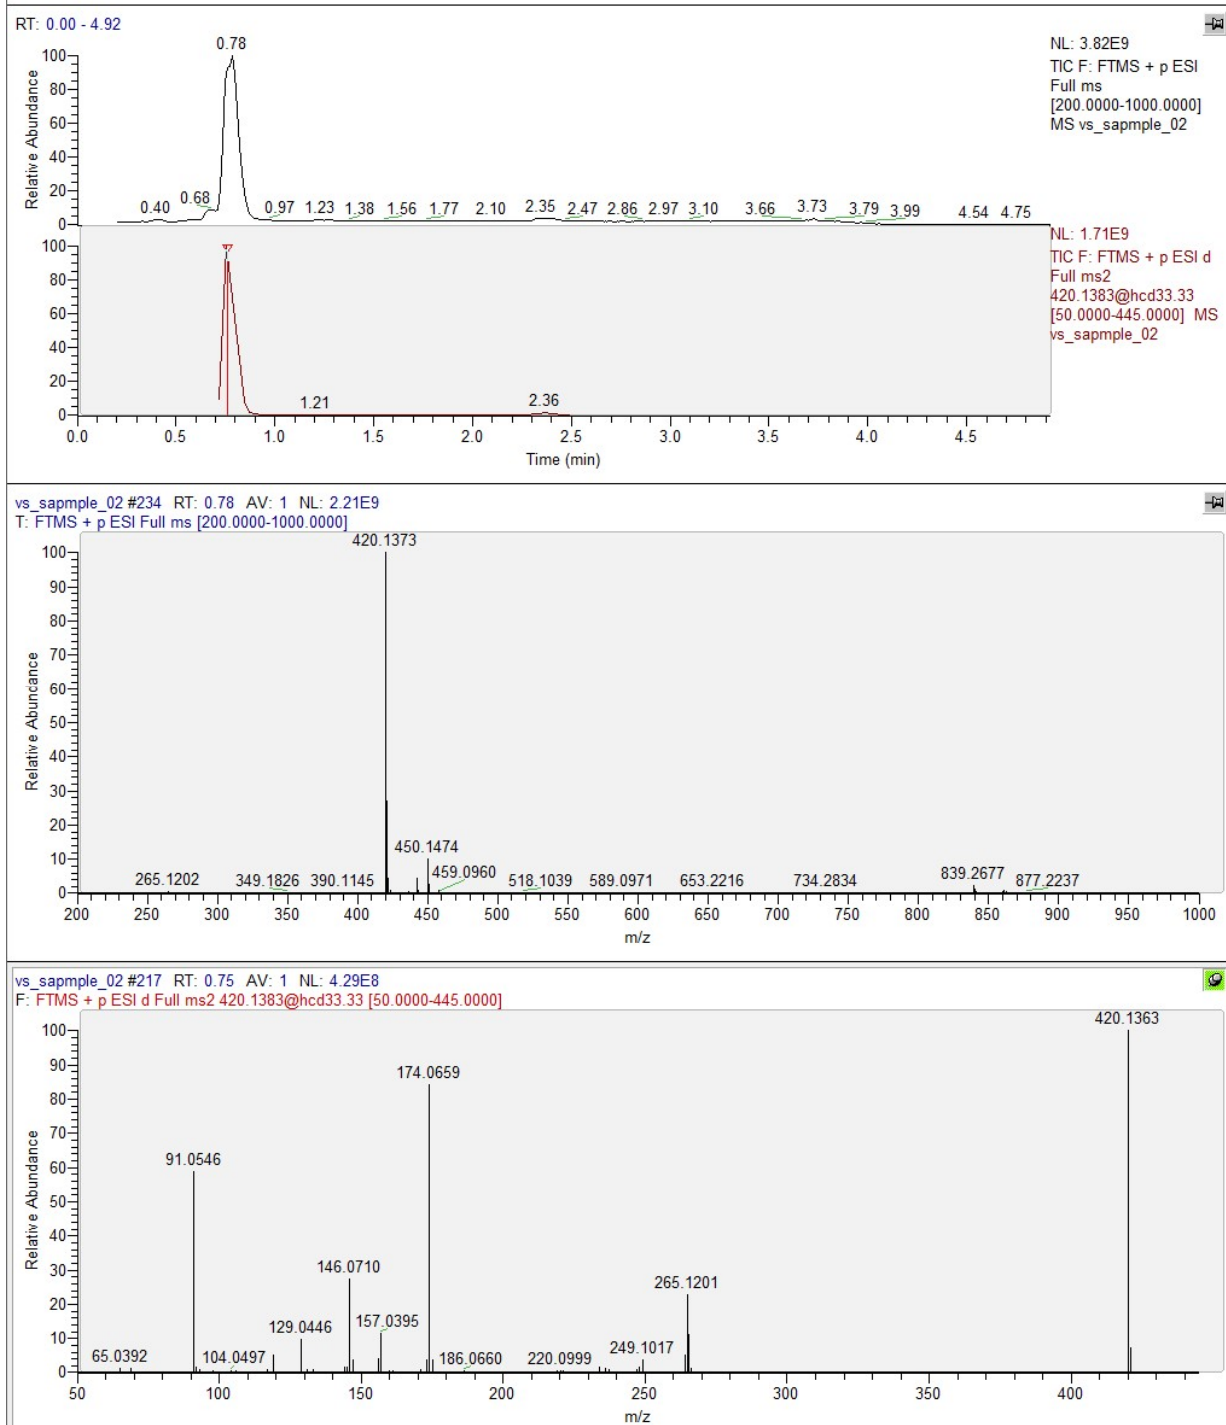Figure S80. HRMS of compound **5j**

29. *N'-((E)-[5-(benzyloxy)-1H-indol-3-yl]methylidenebenzenesulfonohydrazide, 5k* [2] <sup>1</sup>H NMR, <sup>13</sup>C NMR and HRMS spectra of compound 5k can in <https://doi.org/10.3390/antibiotics11050562>
30. *N'-[(E)-(4-chlorophenyl)methylidene]benzenesulfonohydrazide, 5l* [2] <sup>1</sup>H NMR, <sup>13</sup>C NMR and HRMS spectra of compound 5l can be found in <https://doi.org/10.3390/molecules28052058>

## References

- [1] V.R. Karabeliov, M.S. Kondeva-Burdina, N.G. Vassilev, K. Elena, V.T. Angelova, Neuroprotective evaluation of novel substituted 1, 3, 4-oxadiazole and aroylhydrazone derivatives, *Bioorganic & Medicinal Chemistry Letters*, 59 (2022) 128516.
- [2] V.T. Angelova, T. Pencheva, N. Vassilev, E. K-Yovkova, R. Mihaylova, B. Petrov, V. Valcheva, Development of new antimycobacterial sulfonyl hydrazones and 4-methyl-1, 2, 3-thiadiazole-based hydrazone derivatives, *Antibiotics*, 11 (2022) 562.
- [3] V.T. Angelova, T. Tatarova, R. Mihaylova, N. Vassilev, B. Petrov, Z. Zhivkova, I. Doytchinova, Novel Arylsulfonylhydrazones as Breast Anticancer Agents Discovered by Quantitative Structure-Activity Relationships, *Molecules*, 28 (2023) 2058.
